1 A candidate causal variant underlying both higher intelligence and  
2 increased risk of bipolar disorder

3  
4 **Authors:** Susan Q. Shen, MD, PhD<sup>1,4</sup>, Jeong Sook Kim-Han, PhD<sup>1,5</sup>, Lin Cheng<sup>2</sup>, Duo Xu,  
5 PhD<sup>3,6</sup>, Omer Gokcumen, PhD<sup>3</sup>, Andrew E.O. Hughes<sup>1</sup>, Connie A. Myers, PhD<sup>1</sup>, Joseph C.  
6 Corbo, MD, PhD<sup>1\*</sup>

7  
8 **Affiliations:**

9  
10 <sup>1</sup>Department of Pathology and Immunology, Washington University School of Medicine, St.  
11 Louis, MO

12  
13 <sup>2</sup>School of Life Science, Peking University, Beijing, China

14  
15 <sup>3</sup>Department of Biological Sciences, State University of New York at Buffalo, Buffalo, NY

16  
17 <sup>4</sup>Current affiliation: Department of Psychiatry, University of California San Francisco, San  
18 Francisco, CA

19  
20 <sup>5</sup>Current affiliation: Department of Pharmacology, Kirksville College of Osteopathic Medicine,  
21 A. T. Still University of Health Sciences, Kirksville, MO

22  
23 <sup>6</sup>Current affiliation: Department of Physiology and Biophysics, Weill Cornell Medical College,  
24 New York, NY

25  
26 \*Correspondence should be addressed to JCC (email: [jcorbo@wustl.edu](mailto:jcorbo@wustl.edu))

27 **ABSTRACT**

28

29 Bipolar disorder is a highly heritable mental illness, but the relevant genetic variants and  
30 molecular mechanisms are largely unknown. Recent GWAS's have identified an intergenic  
31 region associated with both intelligence and bipolar disorder. This region contains dozens of  
32 putative fetal brain-specific enhancers and is located ~0.7 Mb upstream of the neuronal  
33 transcription factor *POU3F2*. We identified a candidate causal variant, rs77910749, that falls  
34 within a highly conserved putative enhancer, LC1. This human-specific variant is a single-base  
35 deletion in a PAX6 binding site and is predicted to be functional. We hypothesized that  
36 rs77910749 alters LC1 activity and hence *POU3F2* expression during neurodevelopment. Indeed,  
37 transgenic reporter mice demonstrated LC1 activity in the developing cerebral cortex and  
38 amygdala. Furthermore, *ex vivo* reporter assays in embryonic mouse brain and human iPSC-  
39 derived cerebral organoids revealed increased enhancer activity conferred by the variant. To  
40 probe the *in vivo* function of LC1, we deleted the orthologous mouse region, which resulted in  
41 amygdala-specific changes in *Pou3f2* expression. Lastly, 'humanized' rs77910749 knock-in  
42 mice displayed behavioral defects in sensory gating, an amygdala-dependent endophenotype  
43 seen in patients with bipolar disorder. Our study elucidates a molecular mechanism underlying  
44 the long-speculated link between higher cognition and neuropsychiatric disease.

45

## 46 INTRODUCTION

47  
48 Genome-wide association studies (GWAS's) have identified thousands of disease-  
49 associated non-coding regions, but pinpointing the underlying 'causal variants' is challenging<sup>1</sup>.  
50 For neuropsychiatric diseases, this is particularly challenging due to the multiple layers of  
51 biological organization between the variant and behavioral phenotype, and the lack of  
52 appropriate model systems. Bipolar disorder (BD) is a neuropsychiatric illness characterized by  
53 altered mood, classically with episodes of mania and depression<sup>2</sup>. It affects ~1% of the world  
54 population and has high morbidity and mortality<sup>3</sup>. While BD is highly (~80%) heritable, the  
55 relevant genes and pathways are largely unknown, although the amygdala and prefrontal cortex  
56 are strongly implicated<sup>2,4,5</sup>. Fascinatingly, BD is associated with heightened creativity,  
57 highlighting the long-speculated link between 'madness' and 'genius'<sup>6,7</sup>.

58 Recently, three GWAS's of BD implicated an intergenic region at the *MIR2113/POU3F2*  
59 locus in 6q16.1<sup>8-10</sup>. In parallel, multiple GWAS's of educational attainment and intelligence  
60 pinpointed the same locus<sup>11-13</sup>. The 'lead SNPs' (i.e., with the lowest p-values) in the studies of  
61 BD and in the studies of intelligence are in strong linkage disequilibrium (LD), suggesting a  
62 common underlying causal variant. Since the nearest protein-coding gene, *POU3F2*, is located  
63 ~0.7 Mb away, we hypothesized that the underlying causal variant affects the activity of a non-  
64 coding *cis*-regulatory element (CRE, i.e., enhancer or silencer) that regulates *POU3F2*.

65 *POU3F2* (*BRN-2*) is a transcription factor (TF) that is widely expressed in the developing  
66 brain. *POU3F2* and *POU3F3* (*BRN-1*) jointly regulate the neurogenesis, maturation, and  
67 migration of upper-layer cortical neurons<sup>14-16</sup>. The transcriptional targets of *POU3F2* likely  
68 include *FOXP2*, a TF involved in speech and vocalization<sup>17</sup>. Furthermore, overexpression of  
69 *POU3F2* facilitates direct reprogramming of fibroblasts and astrocytes into neurons<sup>18,19</sup>. In mice,  
70 both increased and decreased levels of *Pou3f2* are associated with altered neuronal fate, and a  
71 specific mutation in *Pou3f2* affects cognitive function<sup>15,20,21</sup>. In humans, deletions encompassing  
72 *POU3F2*, and a missense mutation in *POU3F2*, are associated with intellectual disability<sup>22,23</sup>.  
73 Thus, *cis*-regulatory changes that alter *POU3F2* expression levels could similarly perturb brain  
74 development, affecting cognition and other neuropsychiatric traits.

75 Here, we identify and investigate a candidate causal variant, rs77910749, which falls  
76 within LC1, a putative brain enhancer located upstream of *POU3F2* in the intergenic region  
77 implicated by GWAS's of BD and intelligence. We create transgenic reporter mice to interrogate  
78 enhancer activity in neurodevelopment. We also implement a multiplex reporter assay, CRE-seq,  
79 in developing mouse brain and human induced pluripotent stem cell (iPSC)-derived cerebral  
80 organoids to quantify the effect of rs77910749 on enhancer activity. Finally, we use CRISPR-  
81 Cas9 to generate LC1 knockout mice and 'humanized' rs77910749 knock-in mice, thereby  
82 establishing models for behavioral assays. We demonstrate evidence for a BD-related behavioral  
83 phenotype in rs77910749 knock-in mice. Together, our studies provide molecular evidence for a  
84 mechanistic link between intelligence and BD.

## 85 86 RESULTS

87  
88 **The *MIR2113/POU3F2* locus harbors non-coding variants associated with both higher**  
89 **intelligence and elevated risk of BD**

90

91 To assess whether genetic markers associated with intelligence and BD might have a  
92 shared biological origin, we first compared lead SNPs across studies. Two GWAS's of  
93 educational attainment in Caucasians identified a genome-wide significant signal at the  
94 *MIR2113/POU3F2* intergenic region (lead SNP rs9320913)<sup>11,24</sup>. Educational attainment was later  
95 shown to be a proxy phenotype for cognitive performance<sup>25,26</sup>. In two GWAS meta-analyses for  
96 cognitive ability, rs9320913 was not directly genotyped, but the proxy variant rs1906252 ( $r^2 =$   
97  $0.96$  with rs9320913) was associated with increased general cognitive ability<sup>12,27</sup>. Similarly,  
98 another GWAS meta-analysis found that the proxy variant rs10457441 ( $r^2 = 0.91$  with rs9320913)  
99 is associated with greater general cognitive ability<sup>13</sup>. Lastly, a study of 1.1 million individuals  
100 identified this locus as one of the top hits for educational attainment, cognitive performance, and  
101 highest math class completed<sup>28</sup>. Thus, multiple studies demonstrated an association between  
102 cognition and variants at this locus, pointing to a single causal haplotype (Table S1).

103 Around the same time, a GWAS of 9,747 Caucasian BD patients and 14,278 controls  
104 identified a novel risk locus at the same intergenic region<sup>8</sup>. The lead SNP, rs12202969, was  
105 associated with ~10-20% increased risk for BD. Another GWAS study of BD confirmed this  
106 signal<sup>10</sup>. A third GWAS of 9,784 Caucasian BD patients and 30,471 controls pinpointed the  
107 proxy variant rs1487441 ( $r^2 = 0.98$  with rs12202969)<sup>9</sup>. We observed that the two BD GWAS  
108 lead SNPs (rs12202969 and rs1487441) were in high LD with the lead SNPs in the GWAS's of  
109 educational attainment and cognition (rs9320913, rs1906252, and rs10457441) (pairwise  $r^2 =$   
110  $0.92-0.99$ ), suggesting a shared genetic basis for intelligence and BD (Table S1). Intriguingly,  
111 the variants associated with *higher* intelligence were associated with *increased* BD risk,  
112 consistent with the finding that children with higher IQs are at higher risk for developing manic  
113 features<sup>29,30</sup>.

114

### 115 **The candidate causal variant rs77910749 is a human-specific non-coding variant**

116

117 To identify candidate causal variants, we surveyed the epigenomic landscape of the 0.5  
118 Mb region (Chr6:98,300,000-98,800,000 Mb in hg19) identified by the GWAS's (Fig. 1A,  
119 yellow box). This LD block contains dozens of human fetal brain-specific DNase-seq peaks,  
120 which are open chromatin regions that demarcate putative CREs<sup>31</sup>. We then focused on the ~60  
121 kb region of highest LD, which contains all five lead SNPs, SNPs: rs9320913, rs1906252,  
122 rs10457441, rs12202969, and rs1487441 (Fig. 1A, purple box). Within this region, we identified  
123 six fetal brain-specific DNase I hypersensitive sites (DHSs), termed LC0 through LC5 (the 'local  
124 cluster') (Fig. 1B). While none of the lead SNPs fell within fetal brain DHSs, four variants in LD  
125 with rs9320913 ( $r^2 > 0.2$  based on HaploReg v4.1 using 1000 Genomes Phase 1 for  
126 Europeans<sup>32,33</sup>) fell within fetal brain DHSs in the local cluster (Fig. 1C top panel, blue font):  
127 rs77910749 in LC1, rs13208578 in LC2, rs12204181 in LC4, and rs17814604 in LC5.

128 Since phylogenetic conservation often reflects functionality, we hypothesized that the  
129 causal variant fell within a phylogenetically conserved region. As LC4 exhibits low conservation,  
130 rs12204181 was deemed a less likely candidate. LC2 is highly conserved, but the derived allele  
131 corresponding to rs13208578 is present in multiple vertebrate species, including primates,  
132 suggesting that it is well-tolerated (Fig. S1A). Furthermore, LC2 did not exhibit enhancer  
133 activity at E11.5 in a transgenic reporter mouse<sup>34</sup>. Thus, rs77910749 and rs17814604 were the  
134 top candidates, a finding corroborated by CADD, a bioinformatic tool that predicts variant  
135 deleteriousness. CADD ranked rs77910749 and rs17814604 respectively in the top 0.2% and  
136 0.04% of all possible human variants for predicted deleteriousness (Fig. 1C, bottom)<sup>35</sup>.

137 Next, we examined rs77910749 and rs17814604. Phylogenetic analyses demonstrated  
138 that rs17814604 is a newer and rarer allele that emerged from a haplotype already containing  
139 rs77910749 (Fig. S3A and SI). In particular, the allele frequency of rs17814604 is only 0.2% in  
140 East Asians (1000 Genomes Phase 3)<sup>36</sup>. A study of 342 Han Chinese found a significant  
141 association between rs12202969 ( $r^2 = 0.96$  with rs9320913 in Han Chinese) and math ability<sup>37</sup>.  
142 Since rs17814604 is nearly absent in Han Chinese, it is unlikely that rs17814604 is the  
143 underlying causal variant. By contrast, rs77910749 is relatively common worldwide (Fig. S3B  
144 and SI), with an allele frequency of 51% in Europeans (1000 Genomes Phase 3)<sup>36</sup>.

145 Inspection of rs77910749 revealed that it is a single base pair deletion of a ‘T’ in a stretch  
146 of ~100 bases that are nearly perfectly conserved among vertebrates down to coelacanth (Fig.  
147 S1B). Furthermore, although we did not find evidence of a traditional selective sweep,  
148 rs77910749 appears to be a human-specific variant (Fig. S4, Fig. S5, and SI). Thus, rs77910749  
149 is a common, human-specific variant at an evolutionarily conserved nucleotide, which is  
150 hypothesized to be associated with both enhanced intelligence and increased risk of BD.

151

### 152 **rs77910749 falls within a putative developmental brain enhancer**

153

154 Since LC1 is highly conserved, we examined the orthologous region in other vertebrate  
155 genomes. We found that LC1 is located between *Mir2113* and *Pou3f2* in multiple vertebrate  
156 genomes, suggesting that LC1 is part of a genomic regulatory block whose conserved synteny  
157 reflects functionality<sup>38</sup>. This was corroborated by analysis of available Hi-C data (Fig. S6 and SI).

158 Next, we examined the epigenomic landscape of LC1. Published DNase-seq data across  
159 multiple mouse tissues<sup>39</sup> demonstrated that LC1 is a region of open chromatin in the developing  
160 mouse brain, with a strong signal at E14.5 and greatly diminished signal by E18.5 and adulthood  
161 (Fig. 2A). ChIP-seq for two enhancer marks, p300 and H3K27ac<sup>40,41</sup>, suggested that LC1 is an  
162 active brain enhancer at E14.5 (Fig. 2A). Moreover, DNase-seq of mouse retina showed that LC1  
163 is open in the early postnatal period but subsequently closes, suggesting that LC1 has a role in  
164 neurogenesis in both brain and retina (Fig. 2A)<sup>42</sup>. Human methylation data support the notion  
165 that LC1 is active in neural progenitors (Fig. S7). Interestingly, rs77910749 creates a novel CpG  
166 site in LC1 with potential for methylation (Fig. S8).

167

### 168 **rs77910749 increases the affinity of a PAX6 binding site within LC1**

169

170 Because *cis*-regulatory variants can alter enhancer activity by disrupting TF binding, we  
171 searched for predicted TF motifs within LC1 using FIMO (see SI)<sup>43</sup>. We found that rs77910749  
172 falls within a predicted binding site for PAX6 (Fig. 2A). PAX6 is a TF with multiple critical  
173 roles in brain development and likely directly regulates *Pou3f2*<sup>15,44-46</sup>. Published PAX6 ChIP-seq  
174 data from E12.5 mouse forebrain revealed that LC1 is strongly bound by PAX6 *in vivo* (80<sup>th</sup>  
175 ranked peak out of 3,536 peaks) and the only prominent peak in the region (Fig. 2A and 2B)<sup>47</sup>.

176 Based on *in vitro* binding preferences from SELEX<sup>48</sup>, rs77910749 is predicted to slightly  
177 (~3%) decrease PAX6 binding affinity (Fig. 2B). To directly measure the effect of rs77910749  
178 on binding affinity, we expressed and purified the paired domain (PD) of PAX6 and conducted  
179 quantitative electrophoretic mobility shift assays (EMSAs) with fluorescently labeled DNA  
180 probes<sup>49</sup> (Fig. 2C). Since PAX6 has a homeodomain (HD) that can interact with PD, we also  
181 expressed PD with HD (‘PD-HD’ protein). We found that both PD alone and PD-HD can bind  
182 both the wild-type sequence (‘Ref’) and the rs77910749-containing sequence (‘Var’), as

183 demonstrated by specific gel shifts. However, PD5a (an isoform of canonical PAX6) cannot bind  
184 to either the reference or variant sequence (Fig. S9 and SI).

185 Upon quantification of probe binding, we found that rs77910749 confers ~40% increased  
186 binding affinity for PD (95% confidence interval [CI]: 1.32-1.52 fold higher affinity) and ~60%  
187 increased binding affinity for PD-HD (95% CI: 1.28-2.05 fold higher affinity) (Fig. 2D). Thus,  
188 contrary to *in silico* predictions, rs77910749 confers a significant increase in PAX6 binding  
189 affinity.

190

### 191 **Transgenic reporter mice show evidence of LC1 enhancer activity in the developing central** 192 **nervous system (CNS)**

193

194 To test whether LC1 is a *bona fide* enhancer and to investigate its spatiotemporal activity  
195 pattern, we created transgenic reporter mice carrying human LC1 (~1 kb fragment) cloned  
196 upstream of the minimal *Hsp68* promoter and LacZ (Fig. 3A and SI)<sup>50</sup>. Since the mouse DNase-  
197 seq signal for LC1 is strongest at E14.5, we screened ‘transient’ transgenic embryos at E14.5 (i.e.,  
198 embryos were F0’s and represented independent transgenesis events). Among the seven embryos  
199 that were genotypically positive for LacZ, five showed LacZ expression (Fig. 3B): in cerebral  
200 cortex (lines #1, 4, 5), amygdala (lines #1, 2, and 3), and skin (line #5).

201 We also created three independent stable lines (in which F0 transgenics were outcrossed  
202 to generate F1’s). Two stable lines showed essentially no enhancer activity in multiple  
203 genotypically positive E14.5 embryos. The third stable line showed consistent LacZ expression  
204 in the developing amygdala (Fig. 3C). Thus, overall, 6/10 transgenic lines showed LacZ  
205 expression in the developing brain, with 4/6 in the developing amygdala and 3/6 in the  
206 developing cortex. Additionally, 5/6 expressed LacZ in the developing retina (Fig. 3), consistent  
207 with retinal DNase-seq data (Fig. 2A). Together, these data indicate that LC1 is transcriptionally  
208 active in the developing amygdala, cerebral cortex, and retina. PAX6 has known roles in the  
209 development of all three regions<sup>51-53</sup>, whereas POU3F2 has known roles in the cerebral cortex  
210 and retina, and a suggested role in the amygdala<sup>14,16,54</sup>. Some variability in expression was seen  
211 among the reporter lines, possibly due to insertion site effects<sup>55</sup>.

212

### 213 **rs77910749 increases LC1 enhancer activity in mouse cerebral cortex and human cerebral** 214 **organoids**

215

216 To quantitatively assess whether rs77910749 alters the enhancer activity of LC1, we  
217 utilized a multiplexed plasmid reporter assay, CRE-seq<sup>56</sup>. In CRE-seq, a library of barcoded  
218 reporter constructs is introduced into cells, and the resulting expressed transcripts are quantified  
219 by RNA-seq. We previously used CRE-seq to assay thousands of CREs in postnatal mouse retina  
220 and adult cerebral cortex<sup>56,57</sup>. Here, we assayed a smaller pool of constructs with greater  
221 coverage and depth. We created three types of constructs: wild-type LC1 (‘Ref’), LC1 with  
222 rs77910749 (‘Var’), and a promoter-only control. To increase the sensitivity of our assay, the  
223 enhancers were synthesized as multimers (Fig. 4A and SI). For each of the three construct types,  
224 twenty barcoded constructs were created, for a total of sixty barcoded constructs in the GFP  
225 reporter library.

226 We introduced this library into developing mouse cerebral cortex by *ex vivo*  
227 electroporation at E12.5, followed by two days of explant culture<sup>58</sup>. Histologic examination  
228 revealed GFP expression in the deeper cortical layers (Fig. 4B). By contrast, *pDcx-DsRed* (a co-

229 electroporated control construct) was expressed in the upper cortical layers, as expected<sup>59</sup>. *Dcx*  
230 encodes doublecortin, which is expressed in post-mitotic, migrating cortical neurons<sup>60</sup>. There  
231 was little colocalization of DsRed and GFP, suggesting that the CRE-seq library was not active  
232 in migrating neurons, but rather in progenitors and/or a subset of developing neurons in the  
233 cerebral cortex.

234 In parallel, we introduced the CRE-seq library into human iPSC-derived cerebral  
235 organoids (Fig. S10)<sup>61,62</sup>. Seven days after electroporation, live imaging showed electroporated  
236 cells expressing the pCAG-DsRed (a co-electroporated control construct with ubiquitous activity)  
237 (Fig. 4B). A subset of DsRed-expressing cells also expressed GFP, indicating CRE-seq library  
238 activity.

239 We then quantified the *cis*-regulatory activity of the constructs by barcode sequencing  
240 (Fig. 4C and SI). For both mouse cerebral cortex and human cerebral organoids, we observed  
241 enhancer activity of LC1 multimers (both ‘Ref’ and ‘Var’) relative to the promoter-only control.  
242 In the mouse cerebral cortex, the ‘Var’ multimer had ~11% higher activity than ‘Ref’, while in  
243 the human cerebral organoids, the ‘Var’ multimer had ~32% higher activity than ‘Ref’. Thus,  
244 rs77910749 confers significantly higher LC1 enhancer activity in two orthogonal assay systems.

245

### 246 ***In vivo* deletion of LC1 confers region-specific changes in *Pou3f2* expression**

247

248 To directly address whether LC1 regulates *Pou3f2* expression and whether rs77910749  
249 affects *Pou3f2* expression, we used CRISPR-Cas9 to delete the mouse LC1 region (~1 kb) (‘LC1  
250 KO’ mice). We also used CRISPR-Cas9 to knock-in rs77910749 into the orthologous position of  
251 the mouse genome (‘humanized’ KI mice) (Fig. 4D). A global survey of gene expression with  
252 E14.5 whole-brain RNA-seq of homozygous LC1 KO mice and homozygous rs77910749 KI  
253 mice (and corresponding controls) revealed minimal changes (Table S2). This suggested that  
254 LC1 may act in a cell type- and/or region-specific manner not detectable in whole-brain assays<sup>63</sup>.

255 As a more focused approach, we developed an allele-specific expression assay. First, we  
256 used CRISPR-Cas9 to generate mice with a small deletion (4 bp) in the 3’ UTR of *Pou3f2*, which  
257 serves as a barcode. Mice heterozygous for the LC1 deletion (‘LC1 het’) were crossed to mice  
258 with the 3’ UTR variant (Fig. 4E). By measuring allele-specific *Pou3f2* transcripts, we quantified  
259 changes in expression due to the LC1 KO allele relative to the LC1 wild-type allele.

260 Examination of the whole brain revealed no difference in allele-specific *Pou3f2*  
261 expression (Fig. 4F). Since the LacZ transgenic reporter assays suggested that LC1 is active in  
262 the amygdala and cerebral cortex (Fig. 3), we then analyzed the amygdala and cerebral cortex  
263 separately. No difference in *Pou3f2* expression was observed in the microdissected cortex.  
264 However, in the microdissected amygdala, the LC1 KO allele was associated with ~8% higher  
265 *Pou3f2* expression (Fig. 4F). This suggests that LC1 acts as a silencer in a subset of cells in the  
266 amygdala at E14.5.

267 To test the effect of rs77910749 on *Pou3f2* expression, we crossed rs77910749 KI mice  
268 to *Pou3f2* 3’ UTR variant mice and conducted an analogous series of experiments. We did not  
269 observe any allele-specific changes in *Pou3f2* expression associated with rs77910749 in the  
270 whole brain, amygdala, or cerebral cortex at E14.5 (Fig. 4F). Altogether, these data suggest that  
271 LC1 has a role in regulating *Pou3f2*, but rs77910749 alone does not significantly alter *Pou3f2*  
272 expression at this level of tissue resolution in the developing mouse brain.

273

274 **LC1 knockout mice have normal behavior, but humanized rs77910749 knock-in mice have**  
275 **defective sensory gating**

276  
277 Next, we asked whether deletion of LC1 alters behavior. We subjected adult homozygous  
278 LC1 KO mice and wild-type siblings to a locomotion assay and sensorimotor battery, which did  
279 not detect any gross abnormalities. We then assayed the animals for the following: spatial  
280 learning and memory (Morris water maze), conditioned fear, sensorimotor reactivity and sensory  
281 gating (acoustic startle and prepulse inhibition), and anxiety (elevated plus maze and open field  
282 test) (File S1 and SI). The LC1 KO animals appeared normal as measured by these standard  
283 behavioral assays.

284 We then asked whether rs77910749 modifies mouse behavior. In homozygous  
285 rs77910749 KI mice compared to wild-type siblings, no abnormalities in locomotion,  
286 sensorimotor battery, Morris water maze, conditioned fear, or elevated plus maze were seen.  
287 However, when subjected to acoustic startle/prepulse inhibition (PPI) testing, the homozygous  
288 KI mice had a significant ( $p = 0.039$ , ANOVA) defect in PPI, with 22% less PPI compared to  
289 WT (Fig. 5; File S2 and SI). PPI is a measure of sensory gating and correlates strongly with  
290 altered cognition (thought disturbances and psychosis) in humans, and defective PPI is  
291 associated with BD, especially acute mania<sup>64</sup>. Furthermore, intact amygdala function is required  
292 for normal PPI<sup>65</sup>. Thus, rs77910749 KI mice have a specific defect in sensory gating, an  
293 amygdala-dependent BD endophenotype. No deficits in a social approach test or tail suspension  
294 test (measuring depressive behavior) were seen, further demonstrating the specificity of this  
295 behavioral deficit (File S2 and SI)<sup>66,67</sup>.

296  
297 **DISCUSSION**

298  
299 Here, we sought to identify the ‘causal variant’ underlying GWAS signals at the  
300 *MIR2113/POU3F2* locus, which is associated with both increased intelligence and higher risk of  
301 BD. Our experiments reveal a causal chain that directly links the human-specific non-coding  
302 variant rs77910749 to a BD-associated phenotype. We thereby provide the first molecular  
303 evidence of a mechanistic link between increased intelligence and higher risk of BD.

304 We found that rs77910749 falls within a PAX6 binding site and increases the binding  
305 affinity of PAX6. We then showed that rs77910749 falls within an active enhancer, LC1, and  
306 increases enhancer activity as assayed in developing mouse cerebral cortex and human cerebral  
307 organoids. We found that LC1 is active in the developing cerebral cortex, amygdala, and retina.  
308 CRISPR-Cas9 deletion of mouse LC1 altered *Pou3f2* expression in the amygdala. Remarkably,  
309 CRISPR-Cas9 knock-in of rs77910749 (‘humanized’ mice) resulted in defective sensory gating,  
310 an amygdala-dependent endophenotype seen in humans with BD.

311 While the amygdala had been strongly implicated in BD previously<sup>5</sup>, here we provide  
312 molecular evidence of a transcriptional program affecting the amygdala, with downstream effects  
313 on neuropsychiatric phenotypes. Future studies with greater spatiotemporal resolution may  
314 reveal the relevant neuronal subpopulations, while environmental or pharmacological  
315 perturbations of the humanized mice may elicit additional relevant phenotypes.

316 Here, we established rs77910749 as a candidate causal variant. However, we cannot rule  
317 out the possibility that multiple tightly linked variants act together in a local ‘haplotype block’  
318 for full phenotypic effect. The *MIR2113/POU3F2* intergenic region contains dozens of fetal  
319 brain-specific DHSs, which may act together or in a functionally redundant manner<sup>68,69</sup>.



320 Additionally, *Pou3f2* and *Pou3f3* have largely overlapping expression patterns in the CNS and  
321 considerable functional redundancy in the mouse cerebral cortex<sup>14,16</sup>. These layers of redundancy  
322 reduce the likelihood that any single variant will profoundly alter neurodevelopment.  
323 Nonetheless, we demonstrated that a common variant can give rise to subtle molecular and  
324 behavioral changes relevant to neuropsychiatric disease. Our studies underscore the notion that  
325 ostensibly positive traits, such as enhanced intelligence, may also confer susceptibility to  
326 neuropsychiatric disease.

## 327 **METHODS**

328

### 329 **Reference genomes**

330

331 Unless otherwise indicated, genomic coordinates are in hg19 (human) and mm9 (mouse).

332

### 333 **Custom materials and antibodies**

334

335 Oligos, primers, and adapters are listed in Table S3. Buffers and media are listed in Table  
336 S4. Antibody information is provided in SI.

337

### 338 **Animals**

339

340 Mice were kept on a 12 hour light/dark cycle at ~20-22 °C with free access to food and  
341 water. Pregnant dams were euthanized with CO<sub>2</sub> anesthesia and cervical dislocation. For timed  
342 pregnancies, mating occurred overnight and the next day was considered E0.5. All experiments  
343 were conducted in accordance with the Guide for the Care and Use of Laboratory Animals of the  
344 National Institutes of Health and approved by the Washington University Institutional Animal  
345 Care and Use Committee. Behavioral assays are described in SI.

346

### 347 **DNase-seq data**

348

349 Human fetal DNase-seq data from Roadmap Epigenomics and mouse (C57BL/6) DNase-  
350 seq data from ENCODE were visualized in the UCSC Genome Browser (see SI)<sup>31,39,70</sup>.

351

### 352 **Calculation of linkage disequilibrium (LD)**

353

354 Unless otherwise indicated, LD measures ( $r^2$  and  $D'$ ) are based on EUR 1000G Phase 1,  
355 as calculated by HaploReg v4.1<sup>32</sup>.

356

### 357 **Electrophoretic mobility shift assays (EMSAs)**

358

359 Quantitative EMSAs were conducted essentially as described (see also SI)<sup>49</sup>. Binding  
360 reactions were conducted light-protected at 4 °C for 1 hr. Protein-DNA complexes were  
361 separated on 10% TBE gels (Invitrogen), followed by imaging and quantification of band  
362 intensities.

363

### 364 **Generation of transgenic reporter mice**

365

366 The LC1-*Hsp68*-LacZ construct was synthesized by cloning a 951 bp fragment of LC1  
367 (chr6:98,566,099-98,567,049 in hg19, initially obtained by PCR of human gDNA) into the  
368 HindIII and PstI sites of *Hsp68*-LacZ Gateway vector<sup>50</sup>. The Sanger sequencing-confirmed  
369 construct was linearized with HindIII, gel-purified, and diluted with Microinjection Buffer. DNA  
370 was microinjected by the Washington University Mouse Genetics Core into fertilized eggs of  
371 C57BL/6 x CBA hybrid mice and implanted into pseudopregnant dams<sup>71</sup>.

372

373 **Mouse cerebral cortex electroporations**

374 *Ex vivo* cerebral cortex electroporation of E12.5 CD-1 mouse embryos was conducted  
375 essentially as described (see also SI)<sup>58</sup>. After two days, electroporated regions were  
376 microdissected under a fluorescent microscope (Leica MZ16 F) in cold HBSS with calcium and  
377 magnesium and stored in TRIzol (Invitrogen) at -80 °C. Each biological replicate consisted of  
378 tissue from five to eight cortices.

379

380 **Human cerebral organoid electroporations**

381

382 Cerebral organoids were cultured from human iPSCs (see SI). The CRE-seq library (1  
383 µg/uL) was co-electroporated with pCAG-DsRed (1 µg/uL)<sup>72</sup> into Day 88-109 organoids. After 7  
384 days, organoids were rinsed with HBSS with calcium and magnesium and stored in TRIzol  
385 (Invitrogen) at -80 °C. Each biological replicate consisted of eight electroporated organoids.

386

387 **CRISPR-Cas9 mice generation**

388

389 For CRISPR-Cas9 design, oligos, and genotyping, see Table S3 and SI. Microinjections  
390 were conducted in a C57BL/6J background by the Washington University Mouse Genetics Core  
391 and the Micro-injection Core (see SI).

392

393 **Allele-specific expression (ASE) analysis**

394

395 E14.5 embryo brains were microdissected and processed with TRIzol (Invitrogen) for  
396 RNA and DNA extraction. The cDNA (from reverse transcription) and DNA underwent PCR to  
397 amplify the 3'UTR of *Pou3f2* for subsequent amplicon-seq (see SI). The allelic counts of variant  
398 and reference 3' UTR sequences were tabulated to calculate normalized allele-specific  
399 expression.

400

401 **Data availability**

402

403 RNA-seq data are available at Gene Expression Omnibus (GEO), accession GSE117877.

404

## 405 **FIGURE LEGENDS**

406

407 **Figure 1. Prioritization of candidate variants at 6q16.1 associated with higher educational**  
408 **attainment, enhanced cognitive performance, and elevated risk for bipolar disorder.** (A)  
409 Genomic context (hg19, 1 Mb window) of the intergenic locus implicated in GWAS's of  
410 educational attainment, cognition, and BD. The 0.5 Mb region identified by these studies (yellow  
411 box) contains a ~60 kb 'local cluster' region (purple box) with the highest LD. All variants in LD  
412 with rs9320913 ( $r^2 > 0.2$ ) are shown. The nearest protein-coding gene, *POU3F2*, is ~0.7 Mb  
413 away. DNase-seq data from three human fetal brains and four other human fetal tissues are  
414 shown<sup>31</sup>. PhastCons depict 100-way vertebrate conservation<sup>73</sup>. The UCSC Genome Browser was  
415 used for visualization<sup>70</sup>. (B) Enlarged view the 60 kb 'local cluster'. Note the fetal brain (fBrain)  
416 DHSs (LC0 to LC5, pink box). Lead SNPs (red font): rs9320913 for educational attainment<sup>11,24</sup>,  
417 rs1906252 for cognitive performance<sup>12</sup>, rs10457441 for cognitive performance<sup>13</sup>, rs12202969 for  
418 BD<sup>8</sup>, and rs1487441 for BD<sup>9</sup>. (C) Variants within the local cluster that are in LD with rs9320913  
419 (as defined by  $r^2 > 0.2$ ). Note the five lead SNPs (red font) and four variants that fall within LC1-  
420 5 (blue font). The  $r^2$  values (green dots) and Phred-scaled CADD scores are shown (red dots)<sup>35</sup>.

421

422 **Figure 2. The candidate causal variant, rs77910749, affects PAX6 binding.** (A) The 30 kb  
423 'local cluster' in the mouse genome (mm9). Mouse LC1 overlaps with E14.5 brain and P1 retina  
424 DNase-seq<sup>39</sup>, E14.5 forebrain p300 ChIP-seq (orange)<sup>40</sup>, E14.5 forebrain H3K27ac ChIP-seq  
425 (pink)<sup>41</sup>, and E12.5 forebrain PAX6 ChIP-seq (dark red; two replicates are shown)<sup>47</sup>. The  
426 orthologous position of human-specific rs77910749 (black vertical line in LC1) falls within the  
427 PAX6 ChIP-seq peak. (B) Comparison of the reference sequence ('Ref'), sequence with  
428 rs77910749 ('Var'), and PAX6 consensus motifs. The position of rs77910749 is indicated (red  
429 highlighted 'T'). The reference sequence is conserved between mouse and human, and the minus  
430 strand is shown. Motifs were scored using SELEX-derived position weight matrices (PWMs) for  
431 PAX6 protein with PD-HD domains<sup>48</sup>. The logo was generated in enoLOGOS<sup>74</sup>. The E12.5  
432 PAX6 ChIP-seq motif was derived from<sup>47</sup>. (C) Quantitative EMSA assay. Reference and variant  
433 probes of equal lengths were fluorescently labeled. A second probe set (not shown) in which  
434 fluorescent labels were reversed yielded similar results. PAI and RED domains form the PAX6  
435 paired domain (PD), which is separated by the homeodomain (HD) with a linker. (D) Left,  
436 representative EMSA gel. Lanes 1-3, PD binding reaction. Lane 4, cold competition reaction  
437 with PD. Lane 5, probes and marker dye only (no protein). Lanes 6-8, PD-HD binding reaction.  
438 Lane 9, cold competition reaction with PD-HD. For cold competition reactions, 500-fold molar  
439 excess of unlabeled vs. labeled probe was used. Right, quantification of EMSA results. Bound  
440 and unbound fractions were quantified, and relative binding affinity was calculated<sup>49</sup>. Error bars  
441 indicate SEM across six binding reactions (three each from the two probe sets with reversed  
442 fluorophores). Black dotted horizontal line: null hypothesis that rs77910749 has no effect on  
443 affinity.  $P < 0.05$  for PD and PD-HD (95% confidence interval).

444

445 **Figure 3. Transgenic reporter mice show evidence of LC1 activity in the developing CNS.**  
446 Mice were generated that carried a reporter construct for wild-type human LC1 (951 bp fragment)  
447 on the *Hsp68* promoter, driving the expression of LacZ, which stains blue with X-gal<sup>50</sup>. (A)  
448 Schematic of the reporter construct (drawn to scale). (B) Transient transgenic embryos. Of seven  
449 genotypically positive embryos, five (#1-5 shown here) exhibited LacZ staining. Each mouse  
450 represents an independent integration event. Whole mount images of lateral and frontal views;

451 light blue asterisks in the frontal views denote the approximate location of annotated regions in  
452 the brain coronal sections. The entire head was embedded and cryosectioned. For the brain  
453 coronal image of embryo #3, the white oval encircles sparse LacZ-expressing cells. Magnified  
454 images of the eye are also shown. (C) Representative embryo from a stable transgenic line. Of  
455 three genotypically positive stable transgenic lines, only this line exhibited LacZ staining.  
456 Multiple embryos from this stable line had essentially identical LacZ staining patterns, as  
457 expected. Lateral and frontal views are shown. Coronal section of head and corresponding  
458 enlarged images of the amygdala and eye are shown. Sections were counterstained with Nuclear  
459 Fast Red.

460

461 **Figure 4. The variant rs77910749 increases enhancer activity in *ex vivo* mouse brain and**  
462 **human iPSC-derived cerebral organoids, and knockout of LC1 alters *Pou3f2* expression in**  
463 **the developing amygdala *in vivo*.** (A) Schematic of the CRE-seq experiment. Multimers (4X) of  
464 the central 200 bp of human LC1 were cloned upstream of a 3.6 kb *POU3F2* (human) promoter  
465 fragment and GFP with unique 15 bp barcodes (BCs) in the 3' UTR. 'REF' indicates wild-type  
466 sequence and 'VAR' indicates the presence of rs77910749 (red asterisk), whose position is  
467 shown by the black vertical line. Twenty barcoded constructs were generated for each of REF,  
468 VAR, and promoter-only. (B) Library delivery. Left: E12.5 mouse cerebral cortex was  
469 electroporated and harvested after 2 days in culture. A vibratome section (100  $\mu$ m thickness)  
470 shows library GFP expression in the deeper layers of the cerebral cortex. The co-electroporated  
471 control construct, p*Dcx*-DsRed, is expressed in post-mitotic migrating neurons<sup>59</sup>. DAPI is a  
472 nuclear counterstain. Right: Human iPSC-derived cerebral organoids were electroporated and  
473 harvested after 7 days in culture. A representative live image of an electroporated organoid  
474 shows library GFP expression. The co-electroporated control construct, pCAG-DsRed, marks  
475 electroporated cells. (C) Quantification of *cis*-regulatory activity by CRE-seq. P-values were  
476 calculated with two-tailed Student's t-test. (D) CRISPR-Cas9 mutants. Sizes of deletions are  
477 indicated. Note that rs77910749 'knock-in' introduces a 1 bp deletion. (E) Schematic of the ASE  
478 experiment (not to scale). Mice heterozygous for an LC1 mutation were mated to mice with a  
479 variant in the 3' UTR of *Pou3f2*, which served as a molecular transcript barcode (light blue  
480 rectangle). Resulting 'trans-het' mice (heterozygous for both the LC1 mutation and the 3' UTR  
481 variant) were analyzed for allele-specific *Pou3f2* expression at E14.5. The LC1 mutation is in *cis*  
482 to the wild-type 3' UTR. To account for any effects of the 3' UTR variant alone, control animals  
483 (wild-type for LC1 and heterozygous for the 3' UTR variant) were included. (F) E14.5 whole  
484 brain, microdissected amygdala region, and microdissected anterior cortex were analyzed for  
485 allele-specific *Pou3f2* expression in control and trans-het LC1 KO animals (left panel), and in  
486 control and trans-het rs77910749 knock-in animals (right panel). Expression is normalized to  
487 controls. For trans-het LC1 KO whole brain, data were pooled across two lines with nearly  
488 identical deletions (see SI). P-values were calculated with two-tailed Student's t-test. Error bars  
489 indicate SEM between biological replicates. Each biological replicate consisted of tissue from  
490 one embryo. Sample size per condition is indicated (amygdala and anterior cortex samples were  
491 collected from the same embryos). Non-significant, n.s.

492

493 **Figure 5. Prepulse inhibition (PPI) is defective in 'humanized' rs77910749 knock-in mice.**  
494 Adult mice homozygous for the rs77910749 knock-in allele and wild-type (WT) siblings (age-  
495 and sex-matched) underwent acoustic startle testing with prepulse inhibition (PPI) assays. The  
496 knock-in (KI) animals showed defective prepulse inhibition that was statistically significant for

497 the highest decibel (db) tested ( $p = 0.039$ , ANOVA). Mean %PPI  $\pm$  SEM are shown (WT:  $64.6 \pm$   
498  $3.8$ , KI:  $50.4 \pm 5.7$ ). Single block %PPI analysis yielded similar results (File S2). One WT  
499 animal did not have a startle response at baseline and was excluded from the analysis. PPI  
500 measurements were normalized to baseline startle responses. Of note, baseline startle response  
501 magnitudes were lower in KI than WT animals ( $p = 0.018$ ). Non-significant (n.s.) comparisons  
502 are indicated.  
503

504 **ACKNOWLEDGEMENTS**

505

506 We thank the Washington University Animal Behavior Core (David Wozniak), Center  
507 for Genome Sciences and Systems Biology (Jessica Hoisington-Lopez), Micro-injection Core (J.  
508 Michael White), Mouse Genetics Core (Mia Wallace), Protein and Nucleic Acid Chemistry  
509 Laboratory (Misty Veschak), Genome Engineering and iPSC Center (GEiC, Shondra Miller),  
510 and the Genome Technology Access Center for help with genomic analysis. GEiC is supported  
511 in part by NCI grant P30 CA091842, Eberlein, PI. We thank Qiang Lu for the *pDcx*-DsRed  
512 construct and Matthew Toomey, Henry Lather, and Allison Loynd for assistance with  
513 experiments. We are grateful to Shuyi Ma, Daniel Murphy, Matthew Toomey, and Leo Volkov  
514 for critical reading of the manuscript. This work was supported by the NSF grant 1714867 to OG,  
515 NIH grant 5T32EY013360 to SQS, 5T32EY013360 to AH, and EY024958, EY025196, and  
516 EY026672 to JCC, and the Washington University Intellectual and Developmental Disability  
517 Research Center.

518

519 **CONFLICT OF INTEREST**

520

521 The authors do not have any conflicts of interest to disclose.

522

523 **AUTHOR CONTRIBUTIONS**

524

525 SQS and JCC designed the experiments. SQS, JSK, LC, and CAM conducted  
526 experiments. SQS, AEH, DX, and OG conducted bioinformatic analyses. SQS and JCC wrote  
527 the manuscript.

528

## 529 REFERENCES

- 530
- 531 1 Zhang, F. & Lupski, J. R. Non-coding genetic variants in human disease. *Hum Mol Genet* **24**,  
532 R102-110, doi:10.1093/hmg/ddv259 (2015).
- 533 2 Craddock, N. & Sklar, P. Genetics of bipolar disorder. *Lancet* **381**, 1654-1662,  
534 doi:10.1016/S0140-6736(13)60855-7 (2013).
- 535 3 Merikangas, K. R. *et al.* Prevalence and correlates of bipolar spectrum disorder in the world  
536 mental health survey initiative. *Arch Gen Psychiatry* **68**, 241-251,  
537 doi:10.1001/archgenpsychiatry.2011.12 (2011).
- 538 4 Harrison, P. J. Molecular neurobiological clues to the pathogenesis of bipolar disorder. *Curr Opin*  
539 *Neurobiol* **36**, 1-6, doi:10.1016/j.conb.2015.07.002 (2016).
- 540 5 Maletic, V. & Raison, C. Integrated neurobiology of bipolar disorder. *Front Psychiatry* **5**, 98,  
541 doi:10.3389/fpsy.2014.00098 (2014).
- 542 6 Srivastava, S. & Ketter, T. A. The link between bipolar disorders and creativity: evidence from  
543 personality and temperament studies. *Curr Psychiatry Rep* **12**, 522-530, doi:10.1007/s11920-  
544 010-0159-x (2010).
- 545 7 Seneca, L. A. *De Tranquillitate Animi*. Vol. 1 (Harvard University Press, 1970).
- 546 8 Muhleisen, T. W. *et al.* Genome-wide association study reveals two new risk loci for bipolar  
547 disorder. *Nat Commun* **5**, 3339, doi:10.1038/ncomms4339 (2014).
- 548 9 Hou, L. *et al.* Genome-wide association study of 40,000 individuals identifies two novel loci  
549 associated with bipolar disorder. *Hum Mol Genet* **25**, 3383-3394, doi:10.1093/hmg/ddw181  
550 (2016).
- 551 10 Bipolar, D., Schizophrenia Working Group of the Psychiatric Genomics Consortium. Electronic  
552 address, d. r. v. e., Bipolar, D. & Schizophrenia Working Group of the Psychiatric Genomics, C.  
553 Genomic Dissection of Bipolar Disorder and Schizophrenia, Including 28 Subphenotypes. *Cell* **173**,  
554 1705-1715 e1716, doi:10.1016/j.cell.2018.05.046 (2018).
- 555 11 Rietveld, C. A. *et al.* GWAS of 126,559 individuals identifies genetic variants associated with  
556 educational attainment. *Science* **340**, 1467-1471, doi:10.1126/science.1235488 (2013).
- 557 12 Trampush, J. W. *et al.* Independent evidence for an association between general cognitive ability  
558 and a genetic locus for educational attainment. *Am J Med Genet B Neuropsychiatr Genet* **168B**,  
559 363-373, doi:10.1002/ajmg.b.32319 (2015).
- 560 13 Davies, G. *et al.* Genetic contributions to variation in general cognitive function: a meta-analysis  
561 of genome-wide association studies in the CHARGE consortium (N=53949). *Mol Psychiatry* **20**,  
562 183-192, doi:10.1038/mp.2014.188 (2015).
- 563 14 Sugitani, Y. *et al.* Brn-1 and Brn-2 share crucial roles in the production and positioning of mouse  
564 neocortical neurons. *Genes Dev* **16**, 1760-1765, doi:10.1101/gad.978002 (2002).
- 565 15 Dominguez, M. H., Ayoub, A. E. & Rakic, P. POU-III transcription factors (Brn1, Brn2, and Oct6)  
566 influence neurogenesis, molecular identity, and migratory destination of upper-layer cells of the  
567 cerebral cortex. *Cereb Cortex* **23**, 2632-2643, doi:10.1093/cercor/bhs252 (2013).
- 568 16 McEvelly, R. J., de Diaz, M. O., Schonemann, M. D., Hooshmand, F. & Rosenfeld, M. G.  
569 Transcriptional regulation of cortical neuron migration by POU domain factors. *Science* **295**,  
570 1528-1532, doi:10.1126/science.1067132 (2002).
- 571 17 Maricic, T. *et al.* A recent evolutionary change affects a regulatory element in the human FOXP2  
572 gene. *Mol Biol Evol* **30**, 844-852, doi:10.1093/molbev/mss271 (2013).
- 573 18 Vierbuchen, T. *et al.* Direct conversion of fibroblasts to functional neurons by defined factors.  
574 *Nature* **463**, 1035-1041, doi:10.1038/nature08797 (2010).
- 575 19 Zhu, X., Zhou, W., Jin, H. & Li, T. Brn2 Alone Is Sufficient to Convert Astrocytes into Neural  
576 Progenitors and Neurons. *Stem Cells Dev* **27**, 736-744, doi:10.1089/scd.2017.0250 (2018).



- 577 20 Belinson, H. *et al.* Prenatal beta-catenin/Brn2/Tbr2 transcriptional cascade regulates adult social  
578 and stereotypic behaviors. *Mol Psychiatry*, doi:10.1038/mp.2015.207 (2016).
- 579 21 Hashizume, K., Yamanaka, M. & Ueda, S. POU3F2 participates in cognitive function and adult  
580 hippocampal neurogenesis via mammalian-characteristic amino acid repeats. *Genes Brain Behav*  
581 **17**, 118-125, doi:10.1111/gbb.12408 (2018).
- 582 22 Kasher, P. R. *et al.* Small 6q16.1 Deletions Encompassing POU3F2 Cause Susceptibility to Obesity  
583 and Variable Developmental Delay with Intellectual Disability. *Am J Hum Genet* **98**, 363-372,  
584 doi:10.1016/j.ajhg.2015.12.014 (2016).
- 585 23 Westphal, D. S. *et al.* A De Novo Missense Variant in POU3F2 Identified in a Child with Global  
586 Developmental Delay. *Neuropediatrics*, doi:10.1055/s-0038-1669926 (2018).
- 587 24 Okbay, A. *et al.* Genome-wide association study identifies 74 loci associated with educational  
588 attainment. *Nature* **533**, 539-542, doi:10.1038/nature17671 (2016).
- 589 25 Rietveld, C. A. *et al.* Common genetic variants associated with cognitive performance identified  
590 using the proxy-phenotype method. *Proc Natl Acad Sci U S A* **111**, 13790-13794,  
591 doi:10.1073/pnas.1404623111 (2014).
- 592 26 Ward, M. E. *et al.* Genetic variation associated with differential educational attainment in adults  
593 has anticipated associations with school performance in children. *PLoS One* **9**, e100248,  
594 doi:10.1371/journal.pone.0100248 (2014).
- 595 27 Savage, J. E. *et al.* Genome-wide association meta-analysis in 269,867 individuals identifies new  
596 genetic and functional links to intelligence. *Nat Genet* **50**, 912-919, doi:10.1038/s41588-018-  
597 0152-6 (2018).
- 598 28 Lee, J. J. *et al.* Gene discovery and polygenic prediction from a genome-wide association study of  
599 educational attainment in 1.1 million individuals. *Nat Genet* **50**, 1112-1121, doi:10.1038/s41588-  
600 018-0147-3 (2018).
- 601 29 Koenen, K. C. *et al.* Childhood IQ and adult mental disorders: a test of the cognitive reserve  
602 hypothesis. *Am J Psychiatry* **166**, 50-57, doi:10.1176/appi.ajp.2008.08030343 (2009).
- 603 30 Smith, D. J. *et al.* Childhood IQ and risk of bipolar disorder in adulthood: prospective birth cohort  
604 study. *British Journal of Psychiatry Open* **1**, 74-80, doi:10.1192/bjpo.bp.115.000455 (2015).
- 605 31 Roadmap Epigenomics, C. *et al.* Integrative analysis of 111 reference human epigenomes.  
606 *Nature* **518**, 317-330, doi:10.1038/nature14248 (2015).
- 607 32 Ward, L. D. & Kellis, M. HaploReg: a resource for exploring chromatin states, conservation, and  
608 regulatory motif alterations within sets of genetically linked variants. *Nucleic Acids Res* **40**, D930-  
609 934, doi:10.1093/nar/gkr917 (2012).
- 610 33 Genomes Project, C. *et al.* An integrated map of genetic variation from 1,092 human genomes.  
611 *Nature* **491**, 56-65, doi:10.1038/nature11632 (2012).
- 612 34 Visel, A., Minovitsky, S., Dubchak, I. & Pennacchio, L. A. VISTA Enhancer Browser--a database of  
613 tissue-specific human enhancers. *Nucleic Acids Res* **35**, D88-92, doi:10.1093/nar/gkl822 (2007).
- 614 35 Kircher, M. *et al.* A general framework for estimating the relative pathogenicity of human  
615 genetic variants. *Nat Genet* **46**, 310-315, doi:10.1038/ng.2892 (2014).
- 616 36 Genomes Project, C. *et al.* A global reference for human genetic variation. *Nature* **526**, 68-74,  
617 doi:10.1038/nature15393 (2015).
- 618 37 Zhu, B., Chen, C., Moyzis, R. K., Dong, Q. & Lin, C. Educational attainment-related loci identified  
619 by GWAS are associated with select personality traits and mathematics and language abilities.  
620 *Personality and Individual Differences* **72**, 96-100,  
621 doi:<http://dx.doi.org/10.1016/j.paid.2014.08.028> (2015).
- 622 38 Kikuta, H. *et al.* Genomic regulatory blocks encompass multiple neighboring genes and maintain  
623 conserved synteny in vertebrates. *Genome Res* **17**, 545-555, doi:10.1101/gr.6086307 (2007).

- 624 39 The ENCODE Project Consortium. An integrated encyclopedia of DNA elements in the human  
625 genome. *Nature* **489**, 57-74, doi:10.1038/nature11247 (2012).
- 626 40 Wenger, A. M. *et al.* The enhancer landscape during early neocortical development reveals  
627 patterns of dense regulation and co-option. *PLoS Genet* **9**, e1003728,  
628 doi:10.1371/journal.pgen.1003728 (2013).
- 629 41 Nord, A. S. *et al.* Rapid and pervasive changes in genome-wide enhancer usage during  
630 mammalian development. *Cell* **155**, 1521-1531, doi:10.1016/j.cell.2013.11.033 (2013).
- 631 42 Wilken, M. S. B., J.A.; La Torre, A.; Siebenthal, K.; Thurman R.; Sabo, P.; Sandstrom, R.S.; Vierstra,  
632 J.; Canfield, T.K.; Hansen, R.S.; Bender, M.A.; Stamatoyannopoulos, J.; Reh, T.A. DNase I  
633 hypersensitivity analysis of the mouse brain and retina identifies region-specific regulatory  
634 elements. *Epigenetics & Chromatin* **8**, doi:doi:10.1186/1756-8935-8-8 (2015).
- 635 43 Grant, C. E., Bailey, T. L. & Noble, W. S. FIMO: scanning for occurrences of a given motif.  
636 *Bioinformatics* **27**, 1017-1018, doi:10.1093/bioinformatics/btr064 (2011).
- 637 44 Ypsilanti, A. R. & Rubenstein, J. L. Transcriptional and epigenetic mechanisms of early cortical  
638 development: An examination of how Pax6 coordinates cortical development. *J Comp Neurol*  
639 **524**, 609-629, doi:10.1002/cne.23866 (2016).
- 640 45 Coutinho, P. *et al.* Discovery and assessment of conserved Pax6 target genes and enhancers.  
641 *Genome Res* **21**, 1349-1359, doi:10.1101/gr.124115.111 (2011).
- 642 46 Ninkovic, J. *et al.* The BAF complex interacts with Pax6 in adult neural progenitors to establish a  
643 neurogenic cross-regulatory transcriptional network. *Cell Stem Cell* **13**, 403-418,  
644 doi:10.1016/j.stem.2013.07.002 (2013).
- 645 47 Sun, J. *et al.* Identification of in vivo DNA-binding mechanisms of Pax6 and reconstruction of  
646 Pax6-dependent gene regulatory networks during forebrain and lens development. *Nucleic Acids*  
647 *Res* **43**, 6827-6846, doi:10.1093/nar/gkv589 (2015).
- 648 48 Jolma, A. *et al.* DNA-binding specificities of human transcription factors. *Cell* **152**, 327-339,  
649 doi:10.1016/j.cell.2012.12.009 (2013).
- 650 49 Man, T. K. & Stormo, G. D. Non-independence of Mnt repressor-operator interaction  
651 determined by a new quantitative multiple fluorescence relative affinity (QuMFRA) assay.  
652 *Nucleic Acids Res* **29**, 2471-2478 (2001).
- 653 50 Pennacchio, L. A. *et al.* In vivo enhancer analysis of human conserved non-coding sequences.  
654 *Nature* **444**, 499-502, doi:10.1038/nature05295 (2006).
- 655 51 Warren, N. *et al.* The transcription factor, Pax6, is required for cell proliferation and  
656 differentiation in the developing cerebral cortex. *Cereb Cortex* **9**, 627-635 (1999).
- 657 52 Tole, S., Remedios, R., Saha, B. & Stoykova, A. Selective requirement of Pax6, but not Emx2, in  
658 the specification and development of several nuclei of the amygdaloid complex. *J Neurosci* **25**,  
659 2753-2760, doi:10.1523/JNEUROSCI.3014-04.2005 (2005).
- 660 53 Marquardt, T. *et al.* Pax6 is required for the multipotent state of retinal progenitor cells. *Cell* **105**,  
661 43-55 (2001).
- 662 54 Garcia-Moreno, F. *et al.* A neuronal migratory pathway crossing from diencephalon to  
663 telencephalon populates amygdala nuclei. *Nat Neurosci* **13**, 680-689, doi:10.1038/nn.2556  
664 (2010).
- 665 55 Wilson, C., Bellen, H. J. & Gehring, W. J. Position effects on eukaryotic gene expression. *Annu*  
666 *Rev Cell Biol* **6**, 679-714, doi:10.1146/annurev.cb.06.110190.003335 (1990).
- 667 56 Kwasnieski, J. C., Mogno, I., Myers, C. A., Corbo, J. C. & Cohen, B. A. Complex effects of  
668 nucleotide variants in a mammalian cis-regulatory element. *Proc Natl Acad Sci U S A* **109**, 19498-  
669 19503, doi:10.1073/pnas.1210678109 (2012).
- 670 57 Shen, S. Q. *et al.* Massively parallel cis-regulatory analysis in the mammalian central nervous  
671 system. *Genome Res* **26**, 238-255, doi:10.1101/gr.193789.115 (2016).

- 672 58 Nichols, A. J., O'Dell, R. S., Powrozek, T. A. & Olson, E. C. Ex utero electroporation and whole  
673 hemisphere explants: a simple experimental method for studies of early cortical development. *J*  
674 *Vis Exp*, doi:10.3791/50271 (2013).
- 675 59 Wang, X., Qiu, R., Tsark, W. & Lu, Q. Rapid promoter analysis in developing mouse brain and  
676 genetic labeling of young neurons by doublecortin-DsRed-express. *J Neurosci Res* **85**, 3567-3573,  
677 doi:10.1002/jnr.21440 (2007).
- 678 60 Gleeson, J. G., Lin, P. T., Flanagan, L. A. & Walsh, C. A. Doublecortin is a microtubule-associated  
679 protein and is expressed widely by migrating neurons. *Neuron* **23**, 257-271 (1999).
- 680 61 Lancaster, M. A. *et al.* Cerebral organoids model human brain development and microcephaly.  
681 *Nature* **501**, 373-379, doi:10.1038/nature12517 (2013).
- 682 62 Pasca, A. M. *et al.* Functional cortical neurons and astrocytes from human pluripotent stem cells  
683 in 3D culture. *Nat Methods* **12**, 671-678, doi:10.1038/nmeth.3415 (2015).
- 684 63 Osterwalder, M. *et al.* Enhancer redundancy provides phenotypic robustness in mammalian  
685 development. *Nature* **554**, 239-243, doi:10.1038/nature25461 (2018).
- 686 64 Perry, W., Minassian, A., Feifel, D. & Braff, D. L. Sensorimotor gating deficits in bipolar disorder  
687 patients with acute psychotic mania. *Biol Psychiatry* **50**, 418-424 (2001).
- 688 65 Forcellì, P. A., West, E. A., Murnen, A. T. & Malkova, L. Ventral pallidum mediates amygdala-  
689 evoked deficits in prepulse inhibition. *Behav Neurosci* **126**, 290-300, doi:10.1037/a0026898  
690 (2012).
- 691 66 Cryan, J. F., Mombereau, C. & Vassout, A. The tail suspension test as a model for assessing  
692 antidepressant activity: review of pharmacological and genetic studies in mice. *Neurosci*  
693 *Biobehav Rev* **29**, 571-625, doi:10.1016/j.neubiorev.2005.03.009 (2005).
- 694 67 File, S. E. & Seth, P. A review of 25 years of the social interaction test. *Eur J Pharmacol* **463**, 35-  
695 53 (2003).
- 696 68 Hong, J. W., Hendrix, D. A. & Levine, M. S. Shadow enhancers as a source of evolutionary novelty.  
697 *Science* **321**, 1314, doi:10.1126/science.1160631 (2008).
- 698 69 Hnisz, D. *et al.* Super-enhancers in the control of cell identity and disease. *Cell* **155**, 934-947,  
699 doi:10.1016/j.cell.2013.09.053 (2013).
- 700 70 Karolchik, D. *et al.* The UCSC Genome Browser database: 2014 update. *Nucleic Acids Res* **42**,  
701 D764-770, doi:10.1093/nar/gkt1168 (2014).
- 702 71 Hogan, B., Beddington, R., Costantini, F. & Lacy, E. Manipulating the mouse embryo: a laboratory  
703 manual. *Plainview (NY): Cold Spring Harbor Laboratory Press Google Scholar* (1994).
- 704 72 Matsuda, T. & Cepko, C. L. Electroporation and RNA interference in the rodent retina in vivo and  
705 in vitro. *Proc Natl Acad Sci U S A* **101**, 16-22, doi:10.1073/pnas.2235688100 (2004).
- 706 73 Siepel, A. *et al.* Evolutionarily conserved elements in vertebrate, insect, worm, and yeast  
707 genomes. *Genome Res* **15**, 1034-1050, doi:10.1101/gr.3715005 (2005).
- 708 74 Workman, C. T. *et al.* enoLOGOS: a versatile web tool for energy normalized sequence logos.  
709 *Nucleic Acids Res* **33**, W389-392, doi:10.1093/nar/gki439 (2005).
- 710

Figure 1

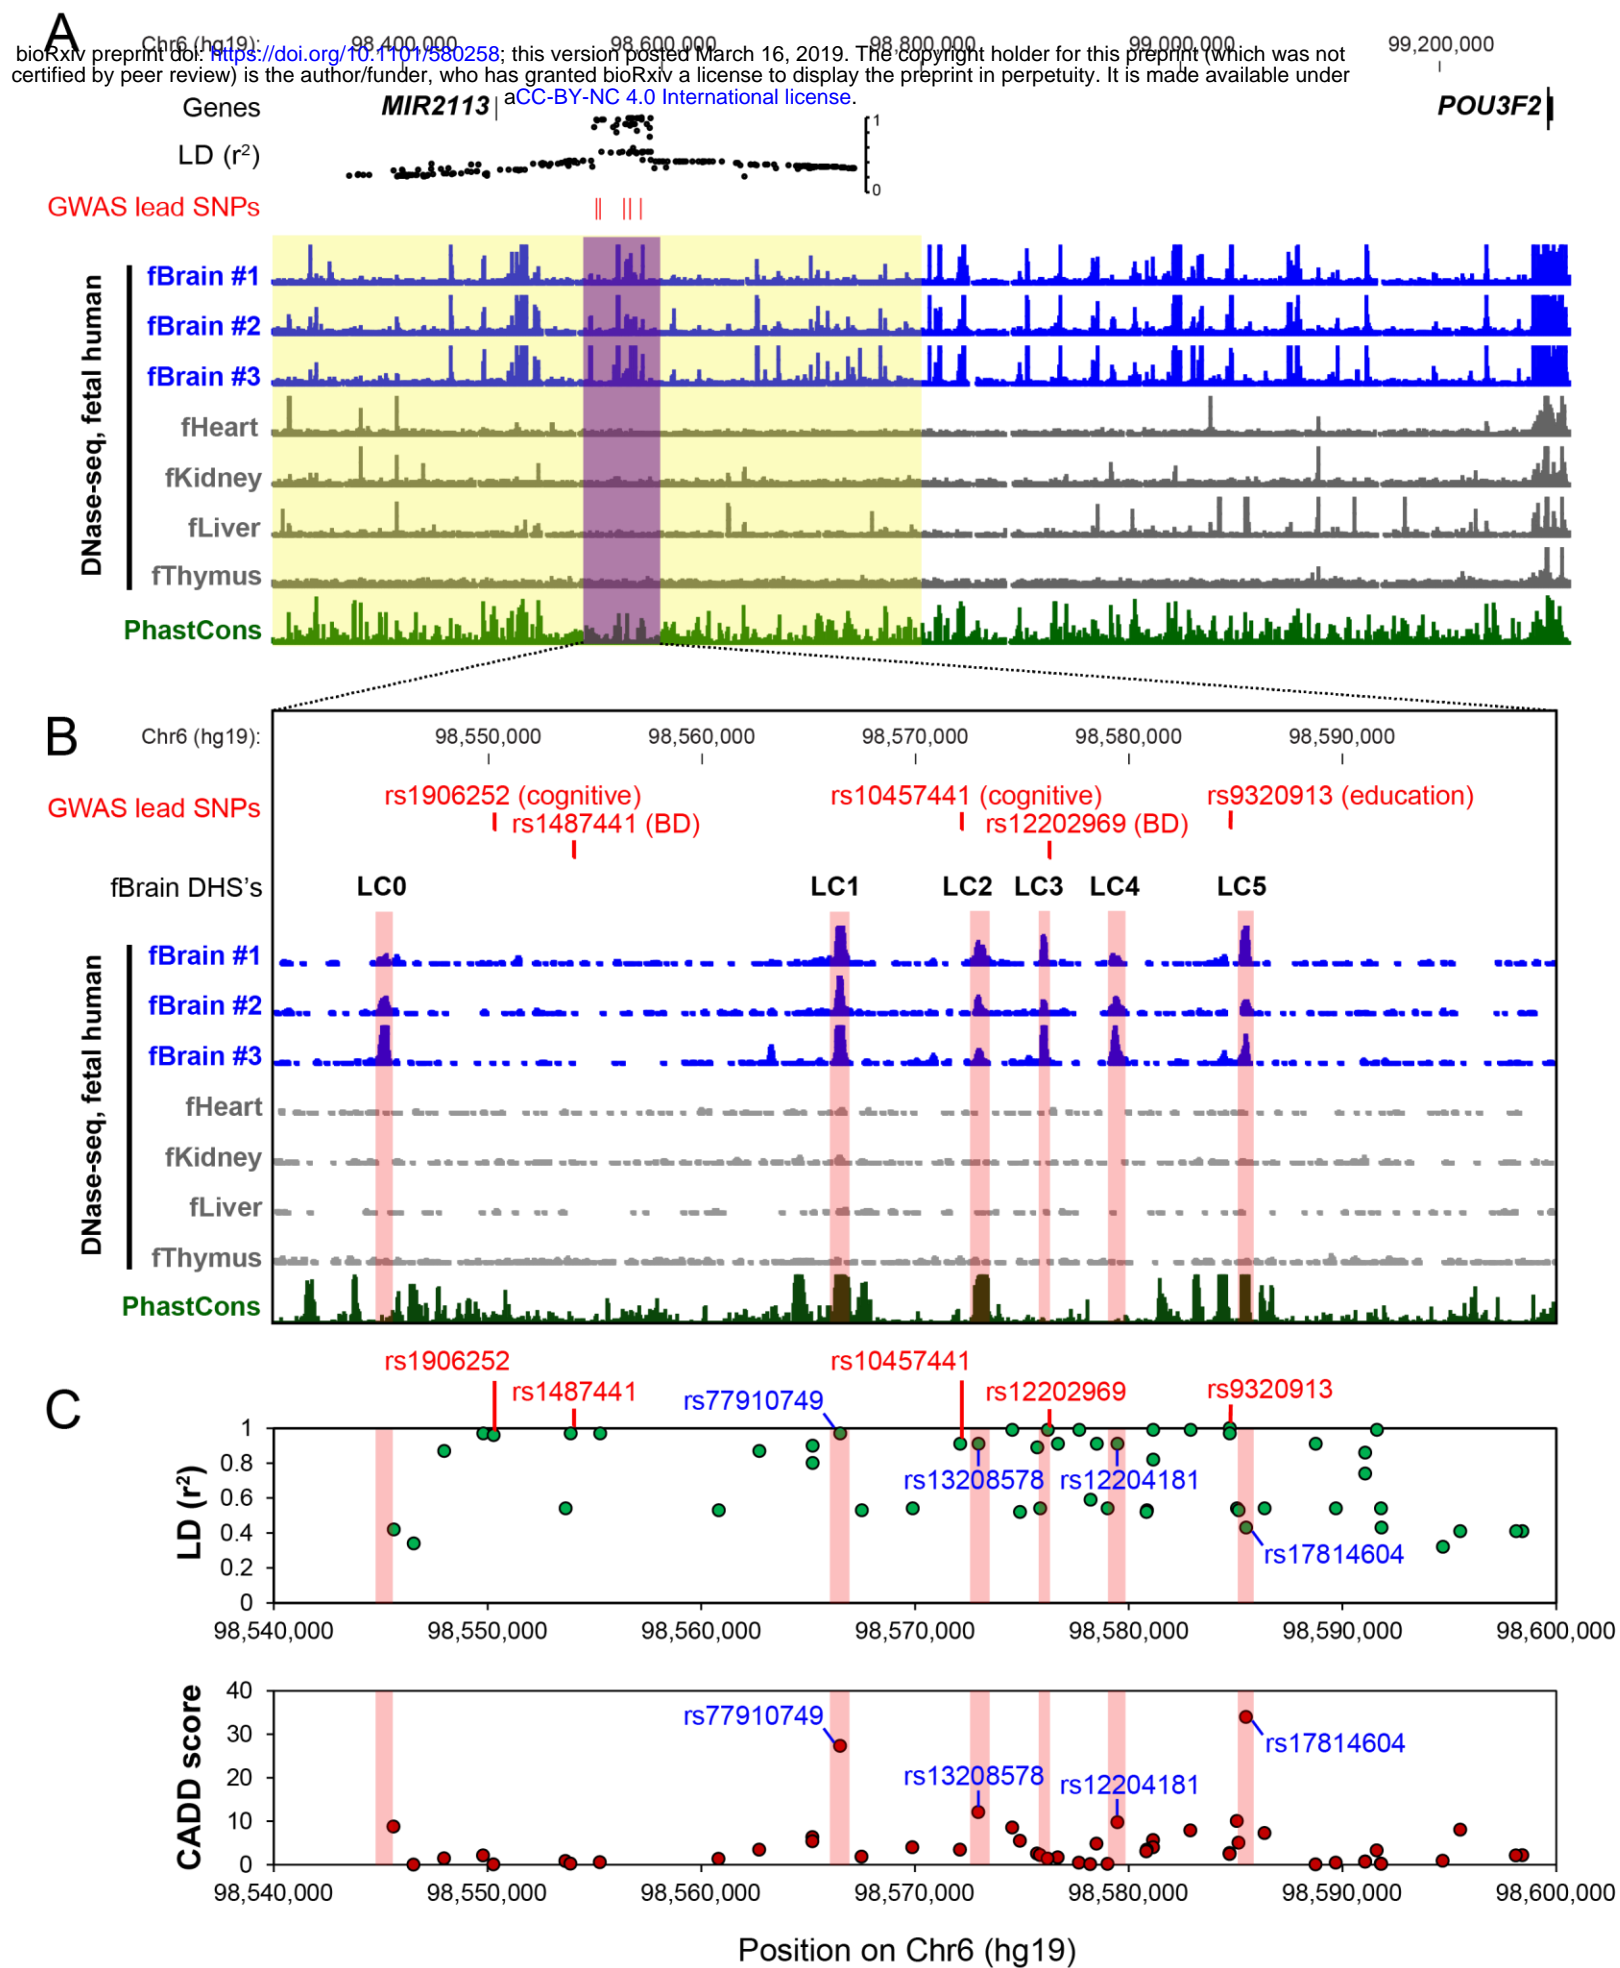

# Figure 2

bioRxiv preprint doi: <https://doi.org/10.1101/580258>; this version posted March 16, 2019. The copyright holder for this preprint (which was not certified by peer review) is the author/funder, who has granted bioRxiv a license to display the preprint in perpetuity. It is made available under aCC-BY-NC 4.0 International license.

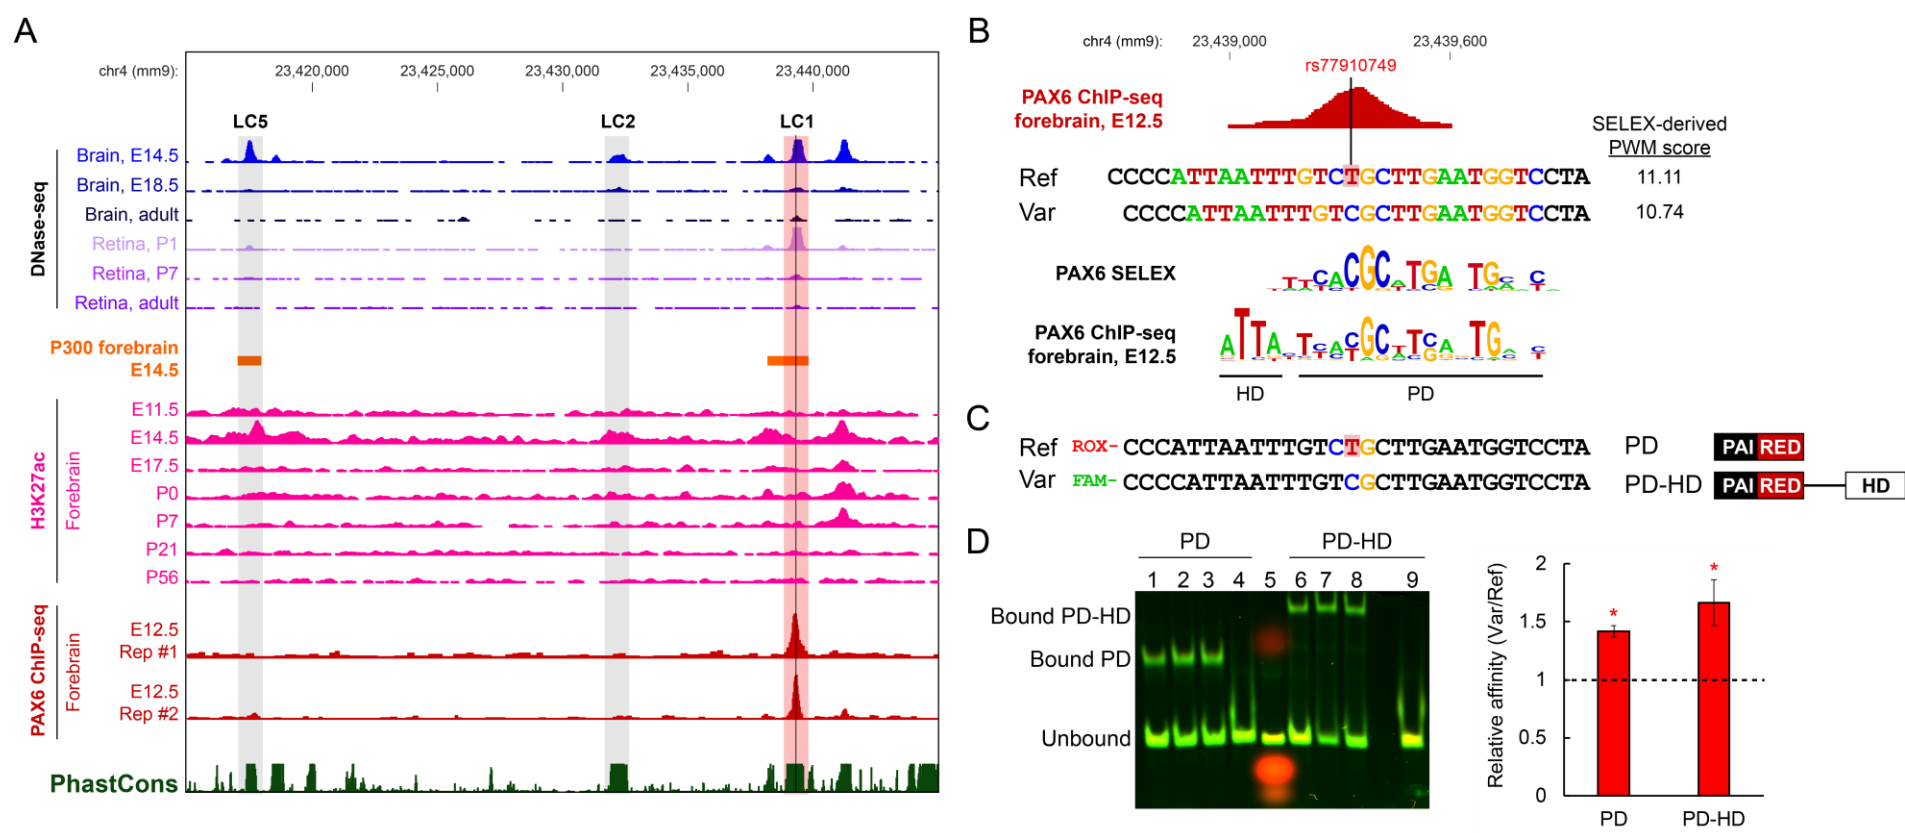

Figure 3

bioRxiv preprint doi: <https://doi.org/10.1101/580258>; this version posted March 16, 2019. The copyright holder for this preprint (which was not certified by peer review) is the author/funder, who has granted bioRxiv a license to display the preprint in perpetuity. It is made available under aCC-BY-NC 4.0 International license.

A

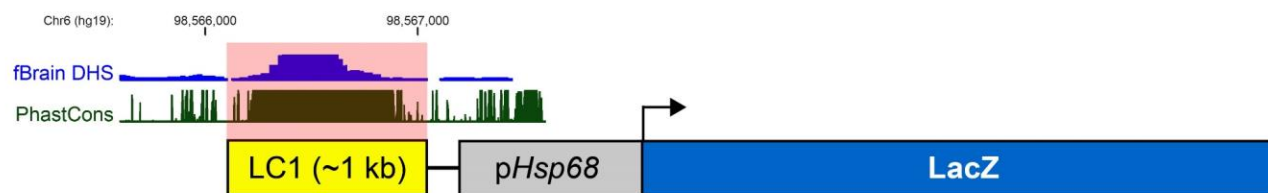

B

**Transient transgenics**

Whole mount    Brain (coronal)    Eye (coronal)

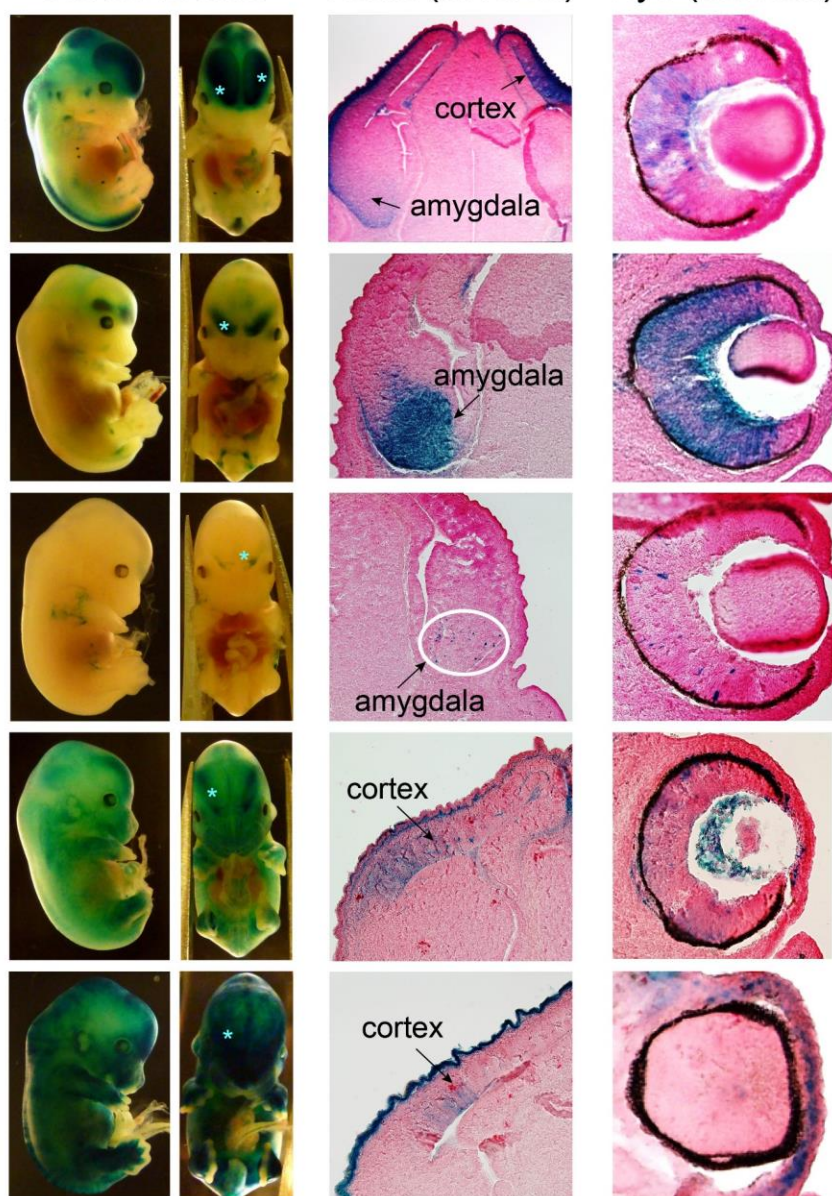

C

**Stable transgenic line**

Representative animal    Coronal

Whole mount

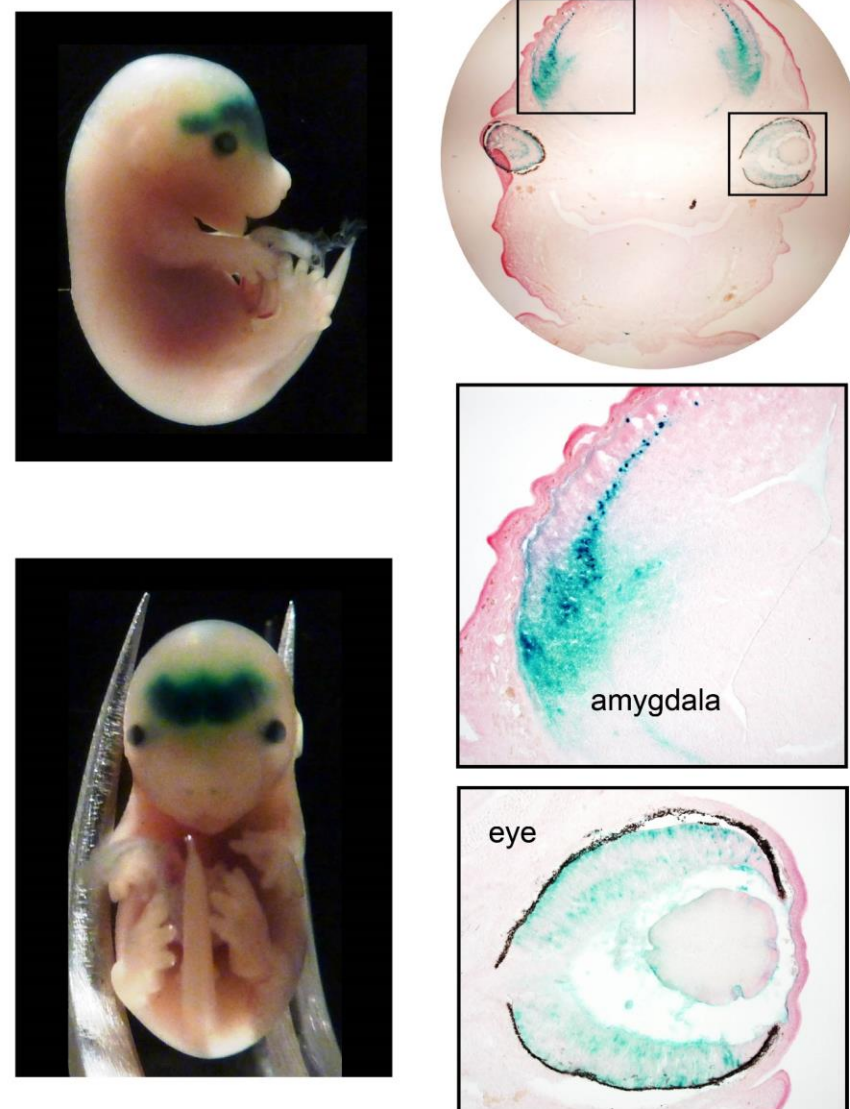

# Figure 4

bioRxiv preprint doi: <https://doi.org/10.1101/580258>; this version posted March 16, 2019. The copyright holder for this preprint (which was not certified by peer review) is the author/funder, who has granted bioRxiv a license to display the preprint in perpetuity. It is made available under aCC-BY-NC 4.0 International license.

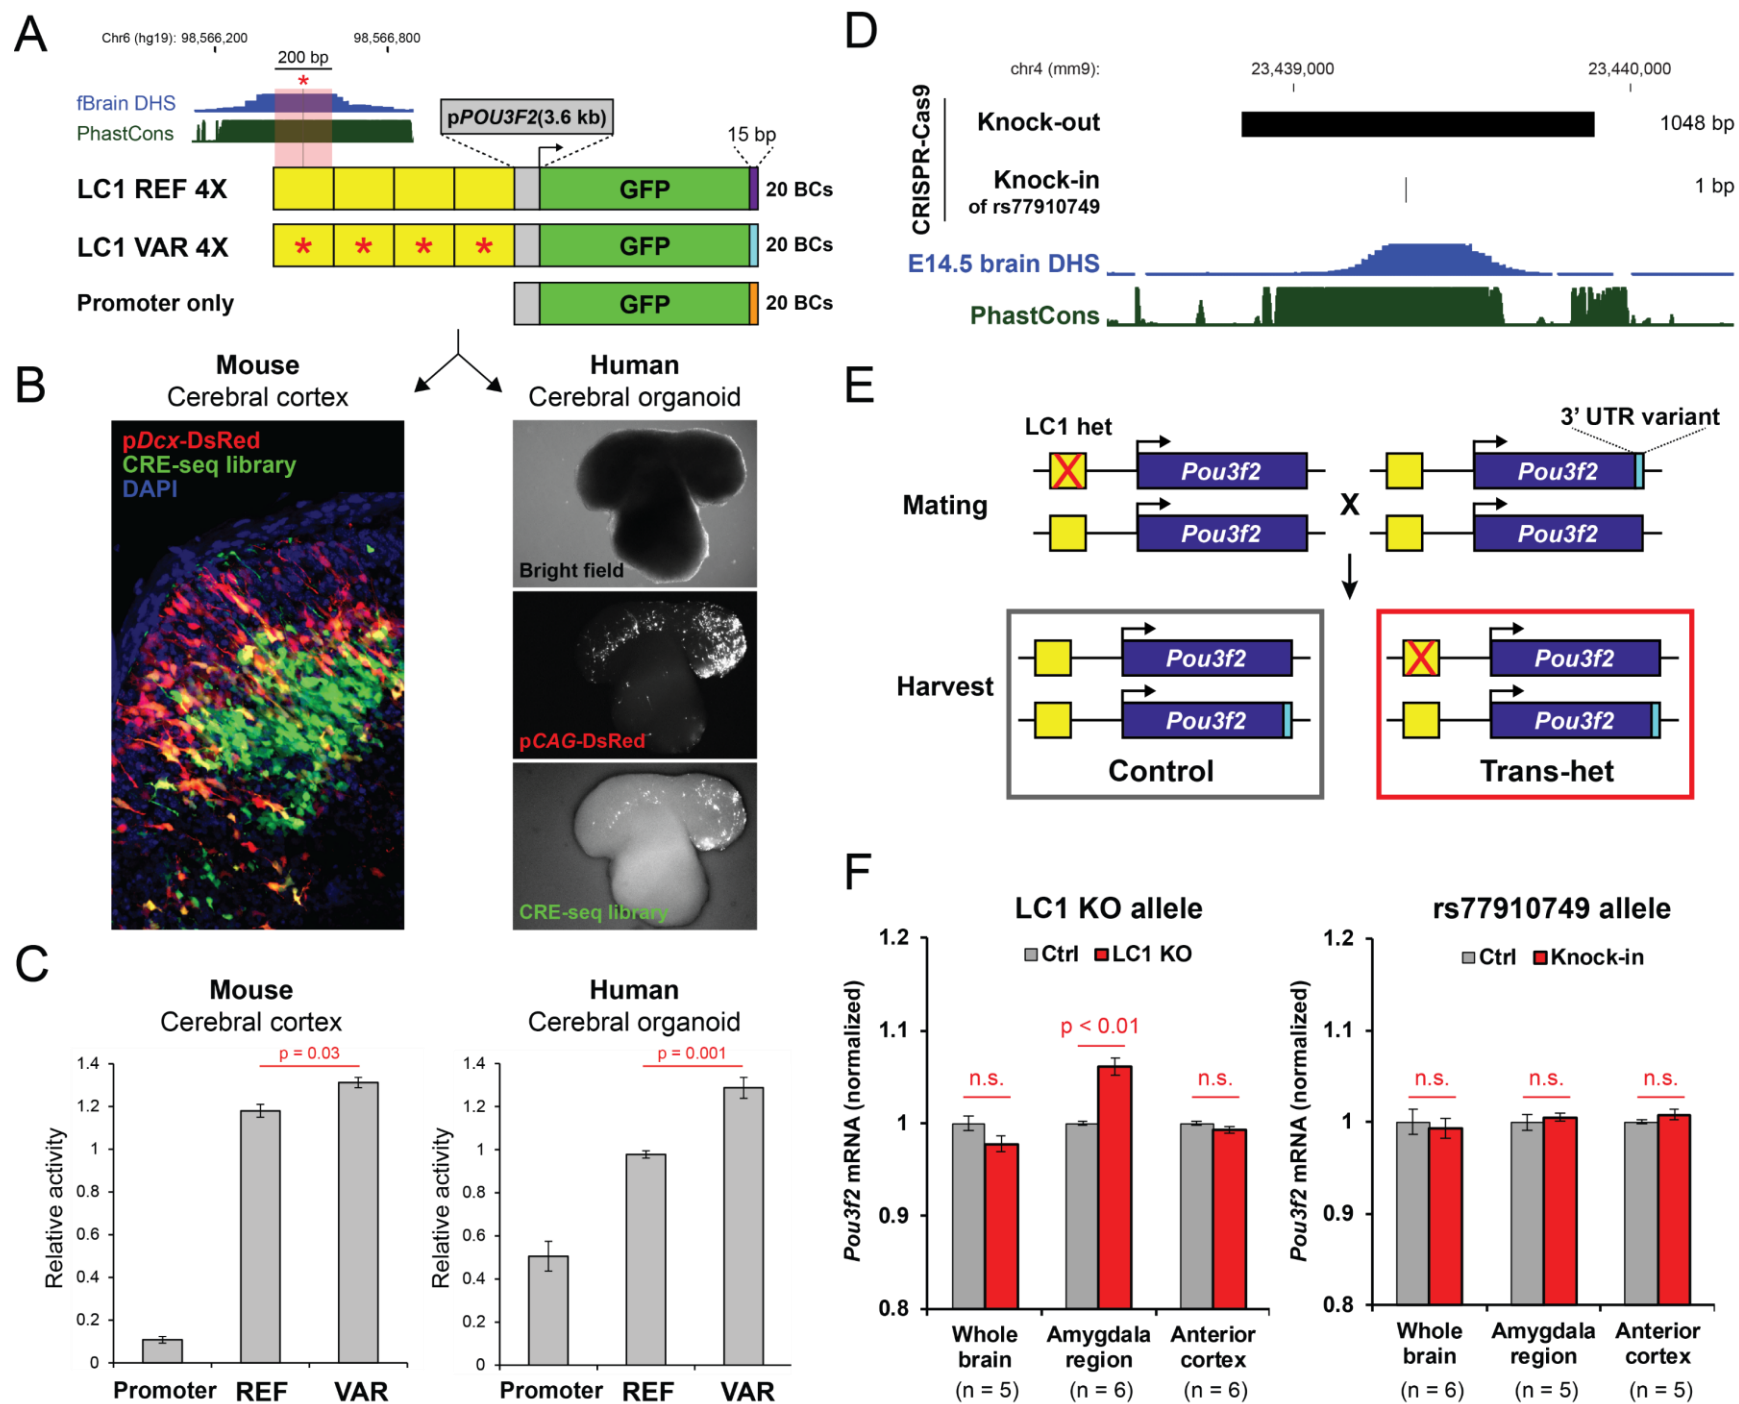

Figure 5

bioRxiv preprint doi: <https://doi.org/10.1101/580258>; this version posted March 16, 2019. The copyright holder for this preprint (which was not certified by peer review) is the author/funder, who has granted bioRxiv a license to display the preprint in perpetuity. It is made available under aCC-BY-NC 4.0 International license.

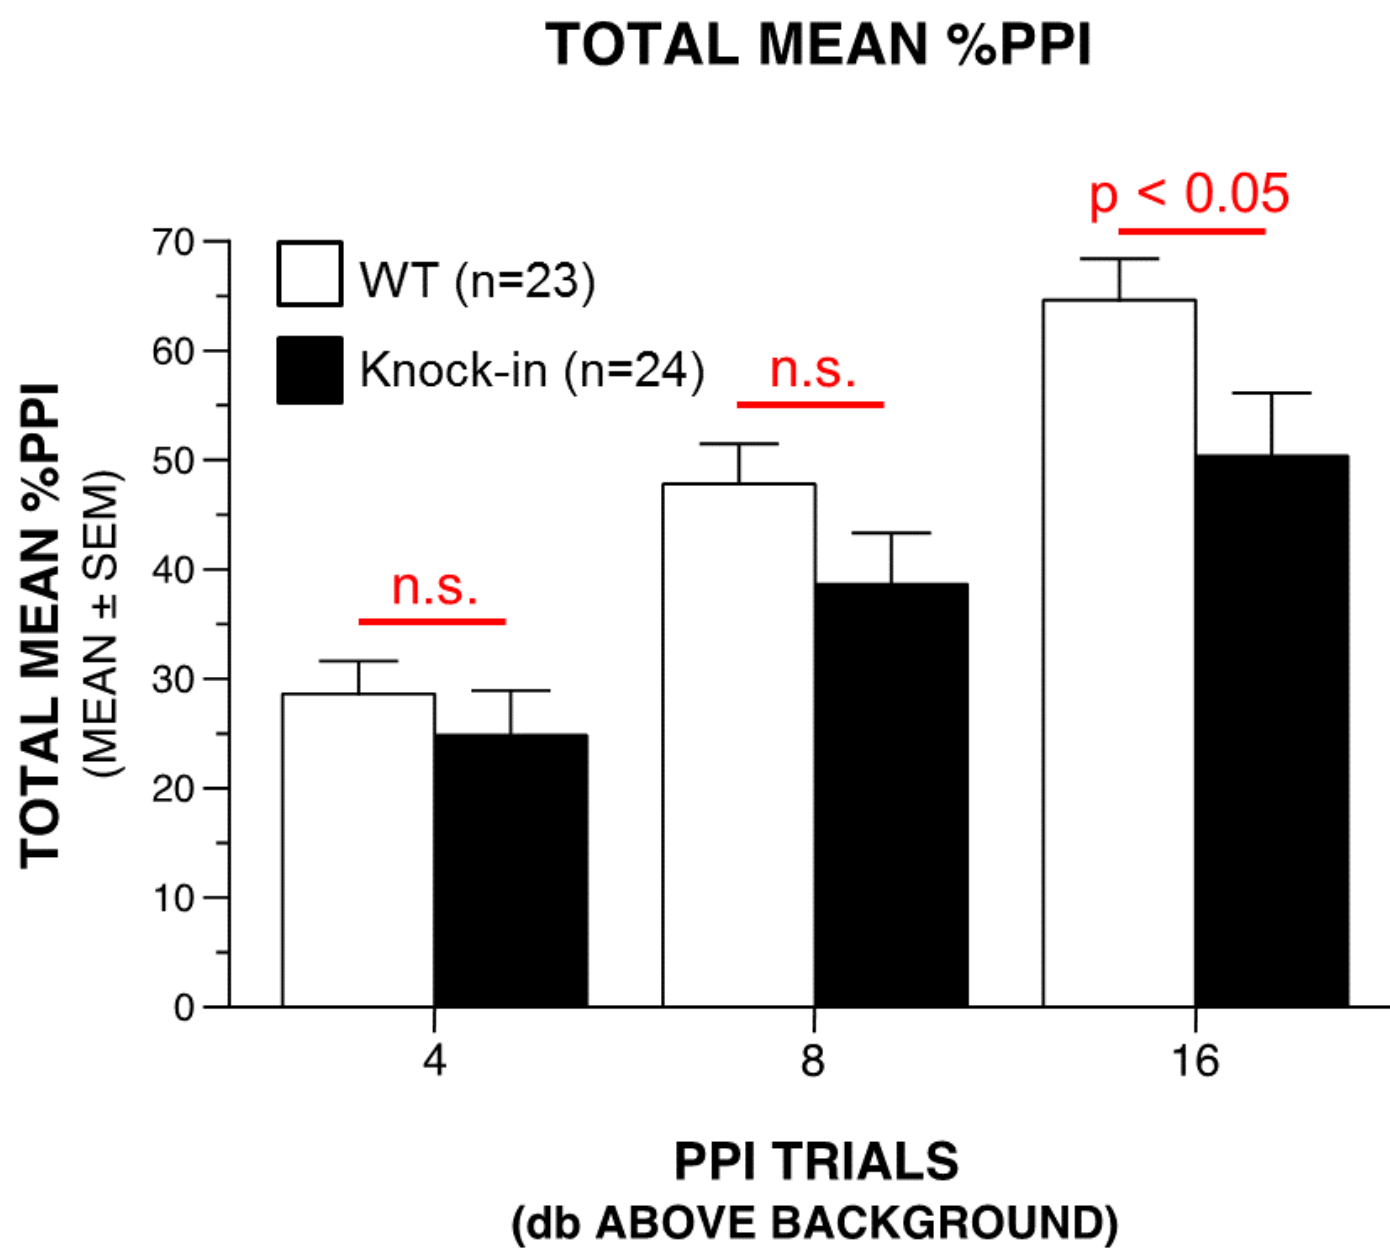

Source: http://biorxiv.org/content/10.1101/580258v1.full.pdf
