# Supplementary material for: A candidate causal variant underlying both enhanced cognitive performance and increased risk of bipolar disorder
Source: bioRxiv or medRxiv preprint supplement (doi:10.1101/580258), 2021-10-28

A

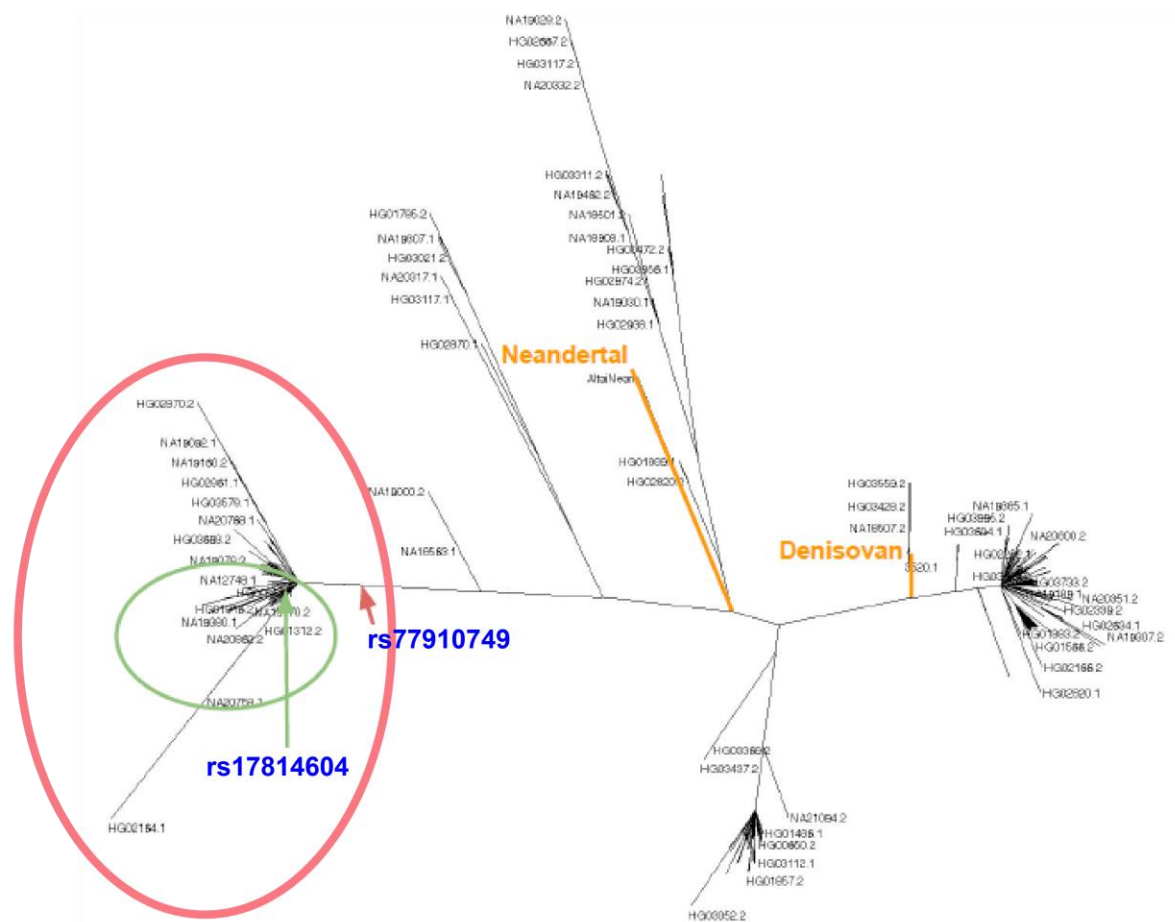

B

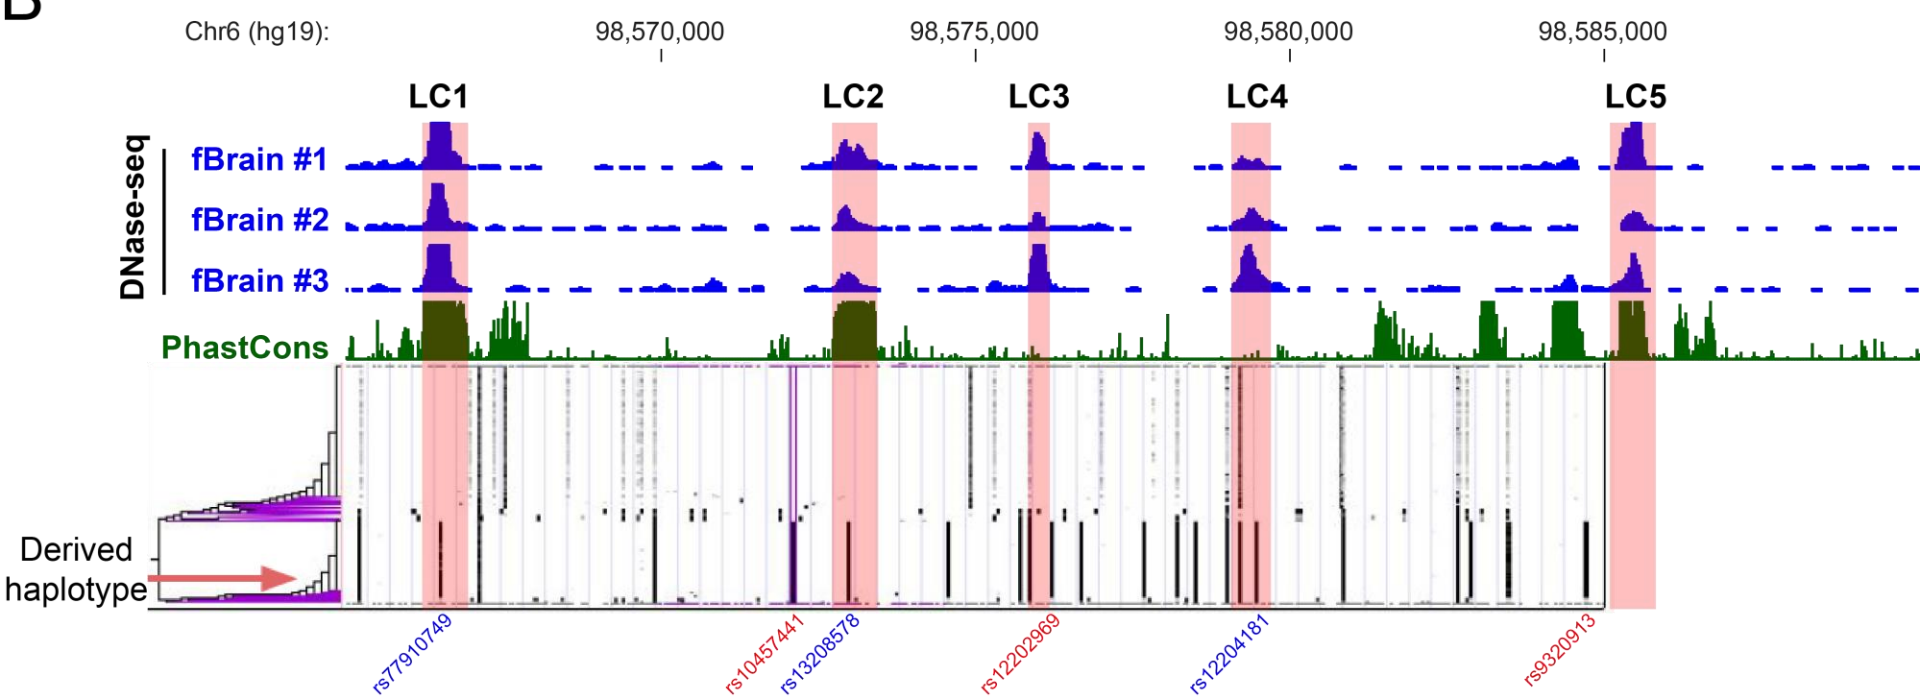

A

rs17814604

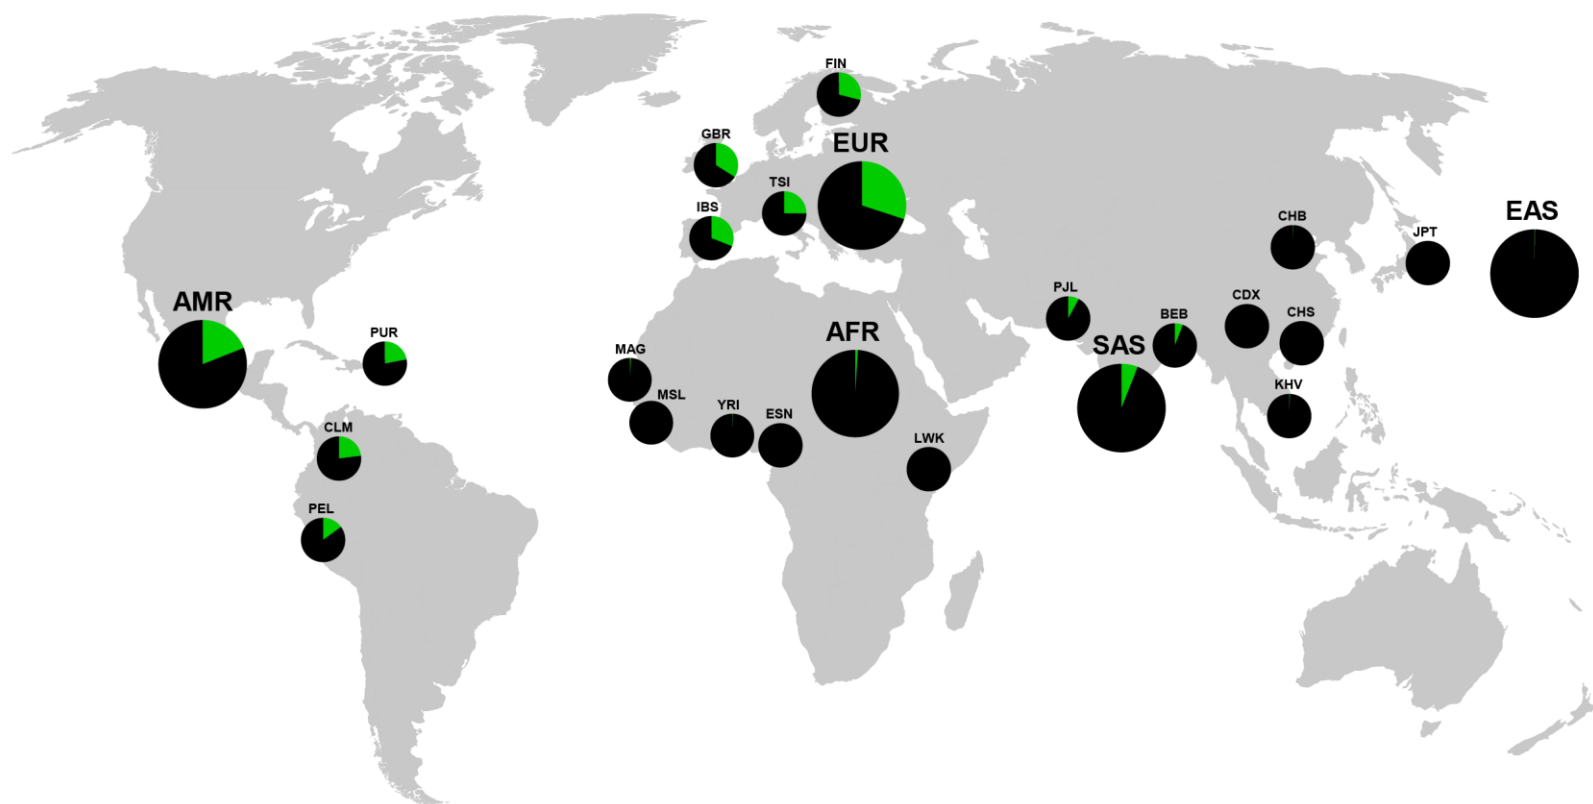

B

rs77910749

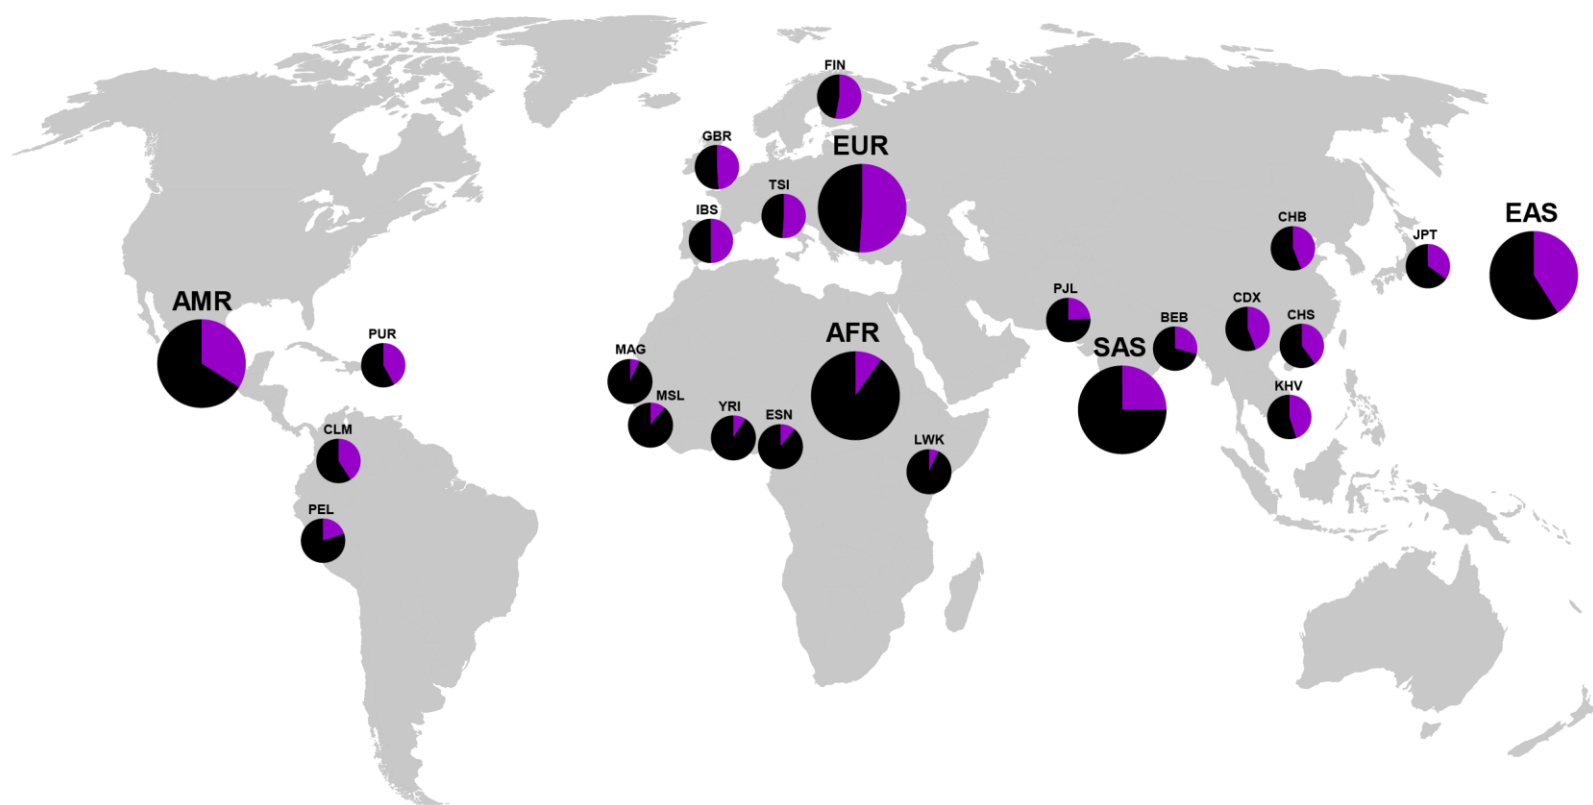

A

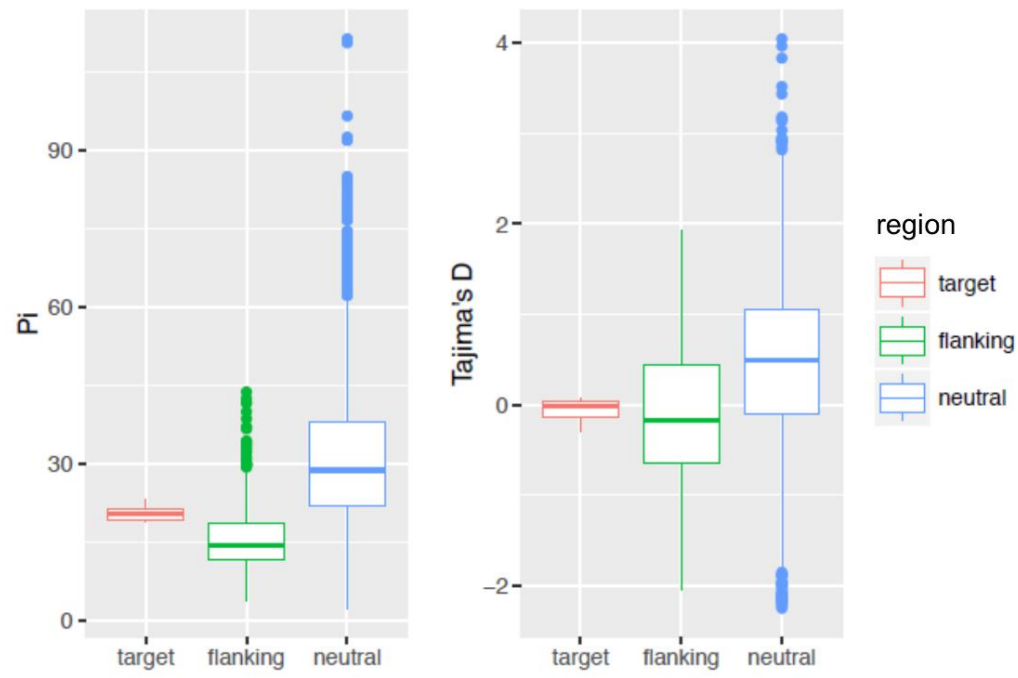

B

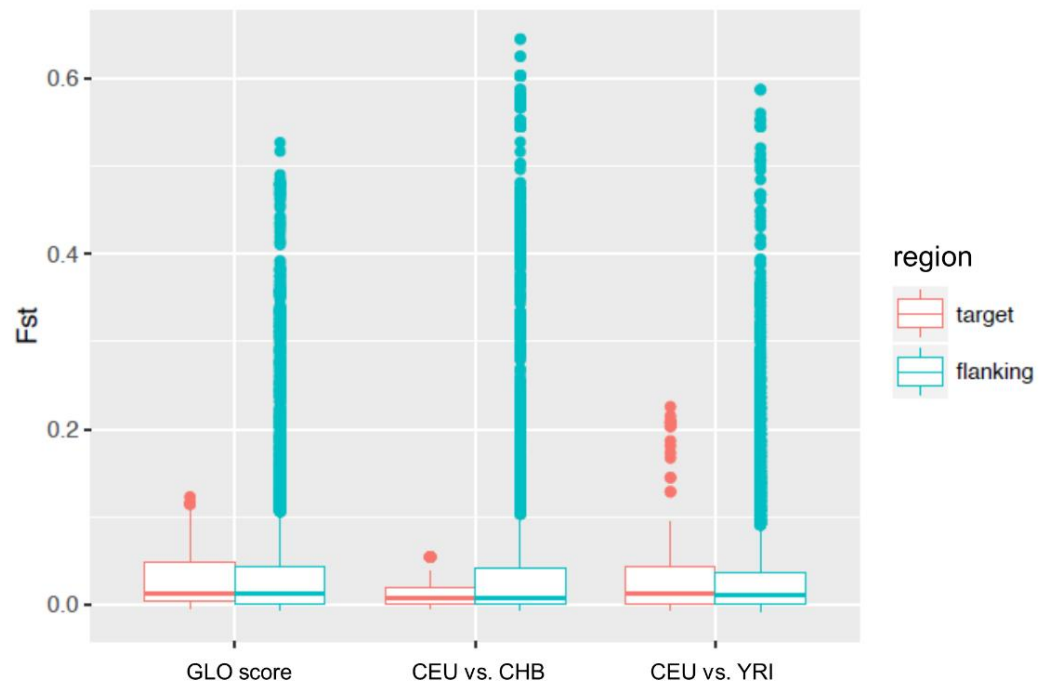

C

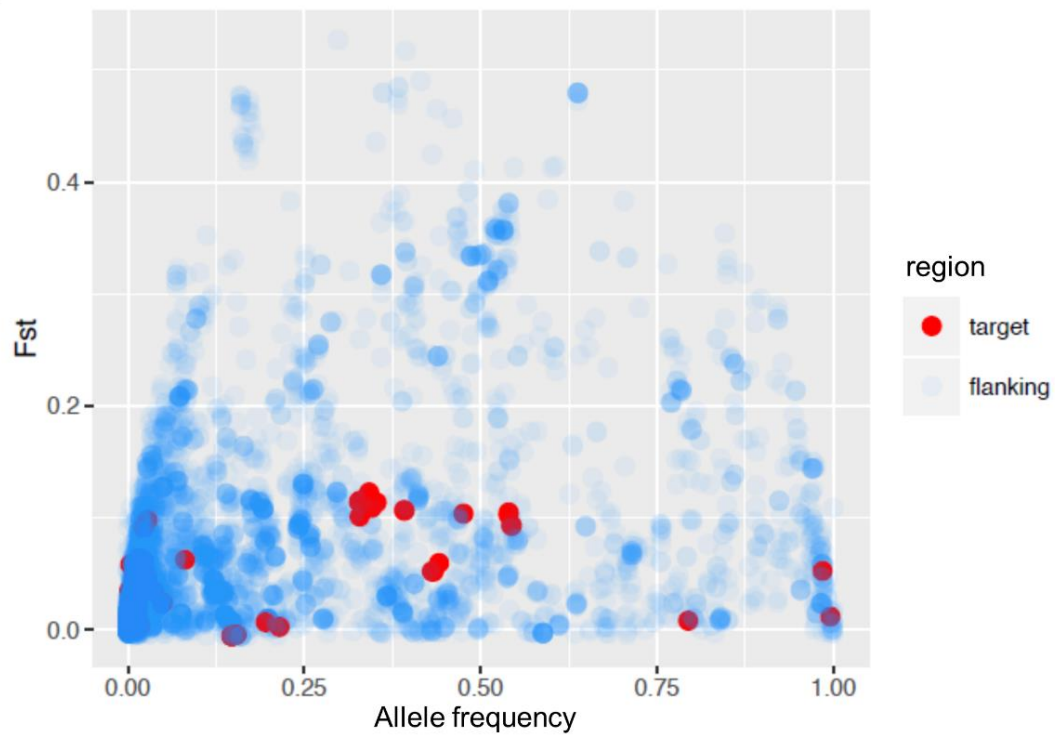

Supplemental Figure S5

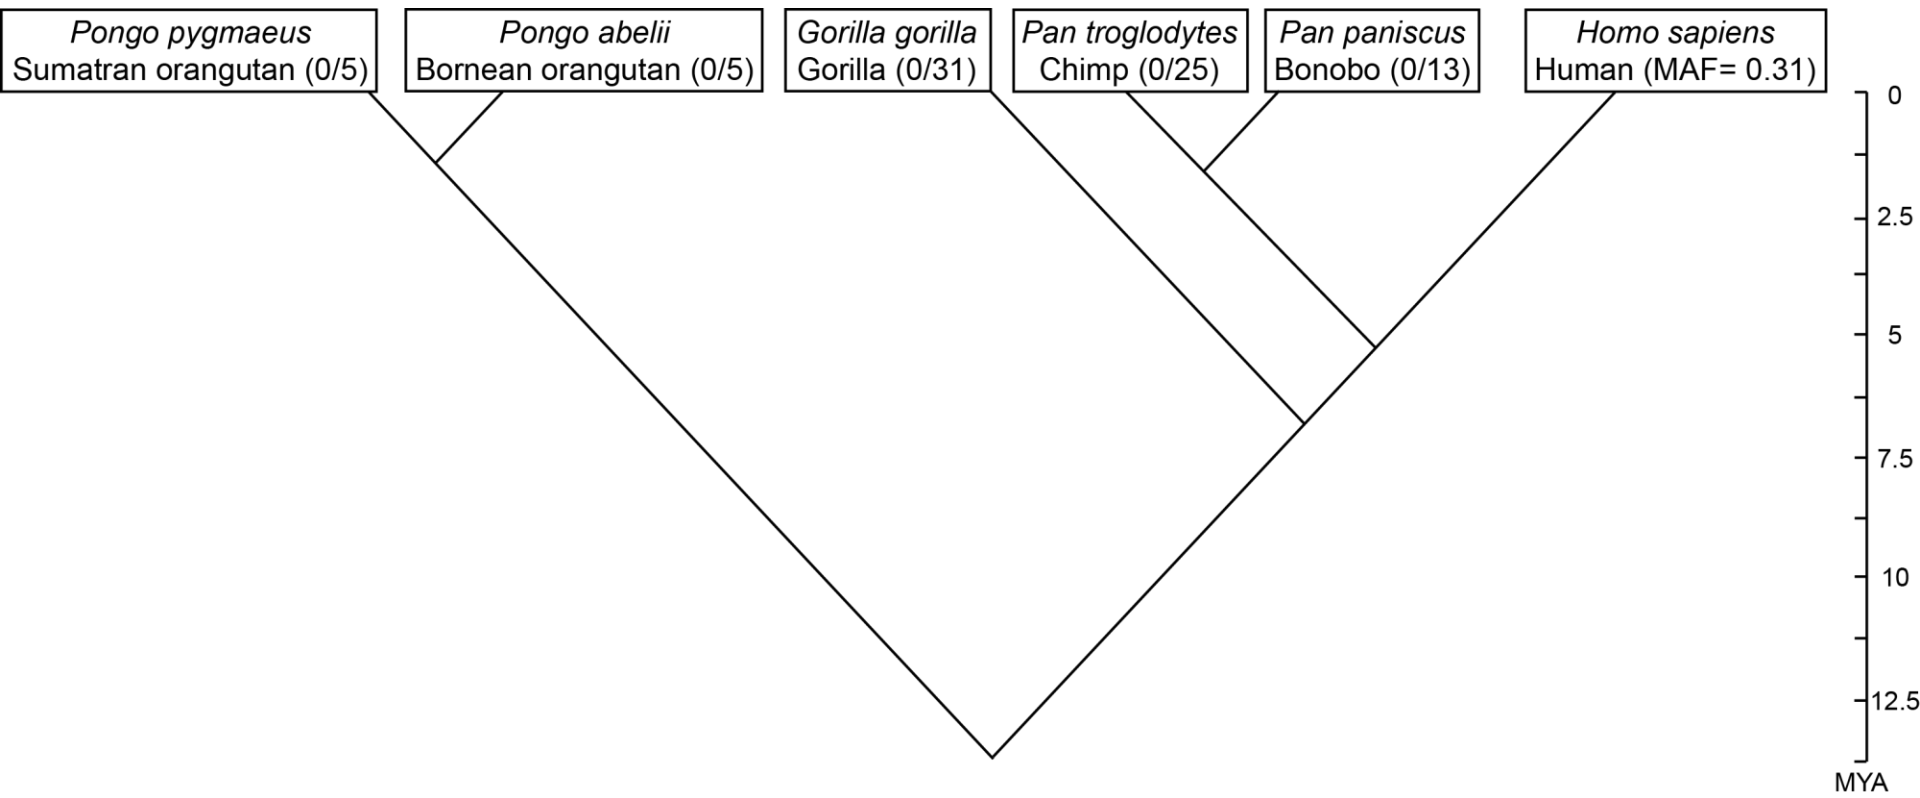

**A**

**Human**

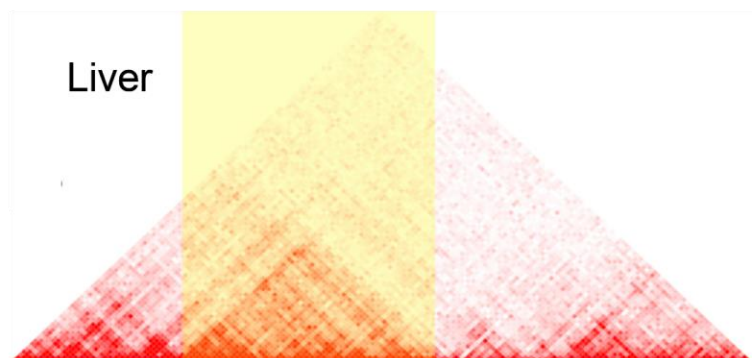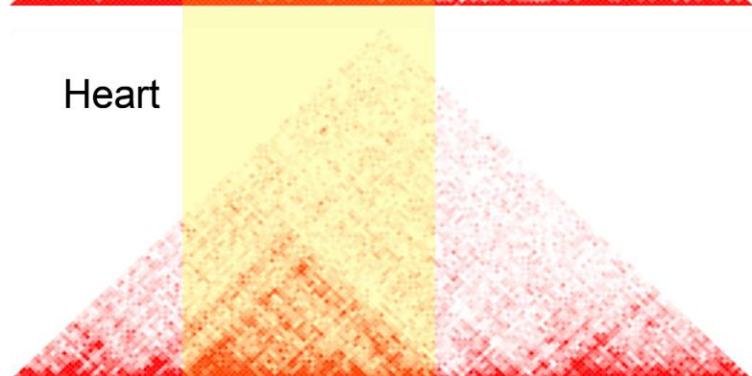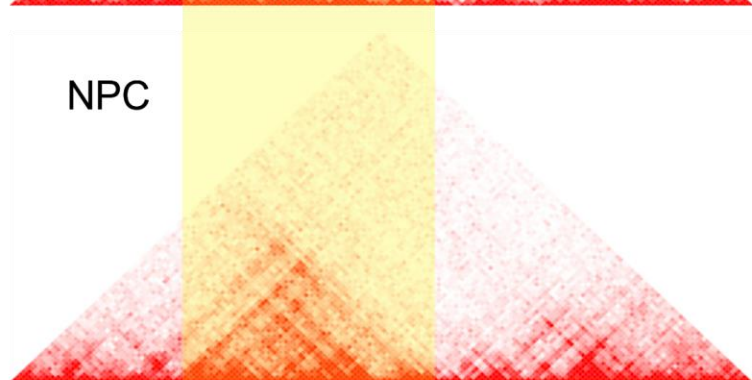

Chr6 (hg19): 97,500,000 98,500,000 99,500,000 100,500,000 101,500,000

**Genes** *MIR2113* *POU3F2*  
LC1

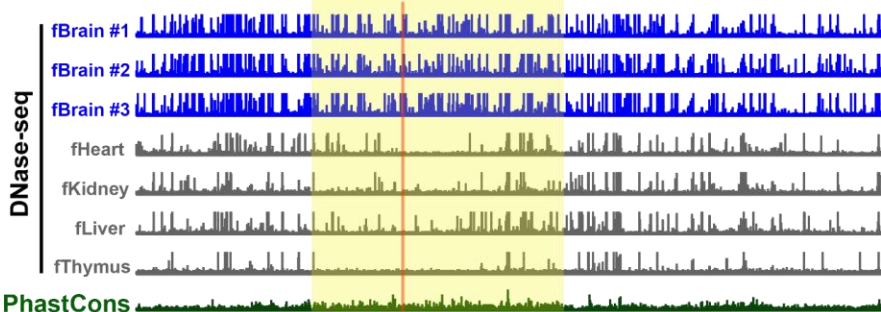

**B**

**Mouse**

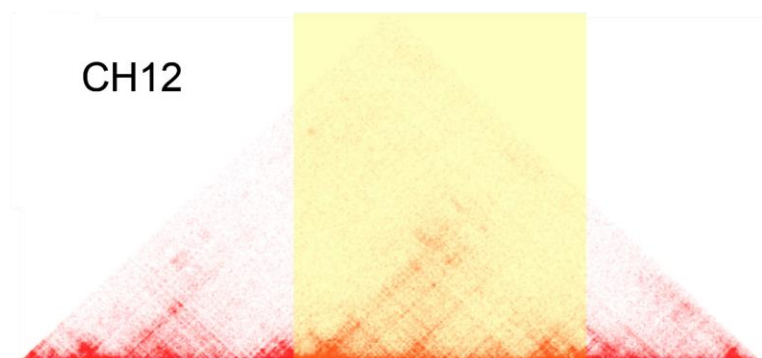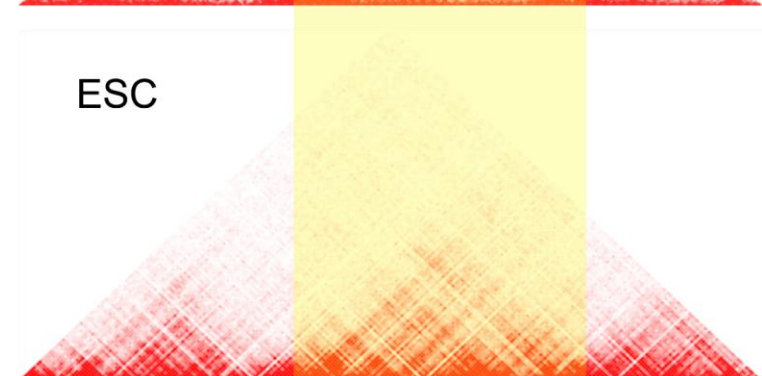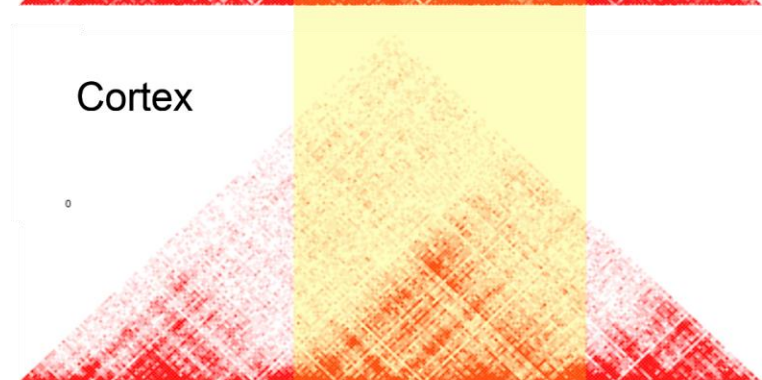

chr4 (mm9): 20,000,000 21,000,000 22,000,000 23,000,000 24,000,000 25,000,000 26,000,000

**Genes** *Pou3f2* *Mir2113*  
LC1

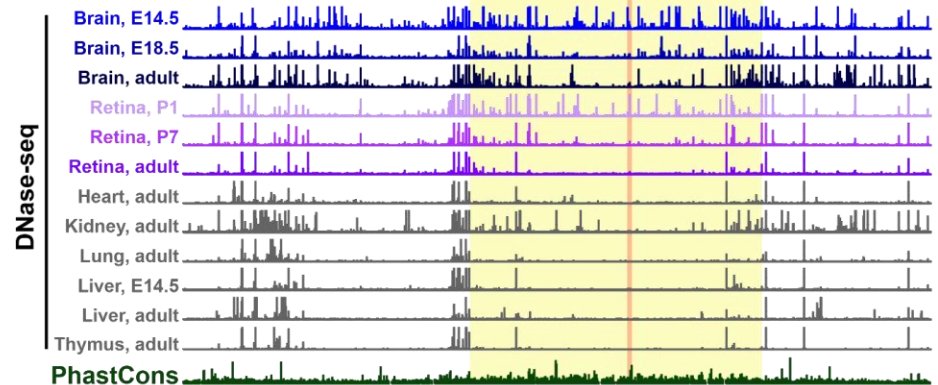

Supplemental Figure S7

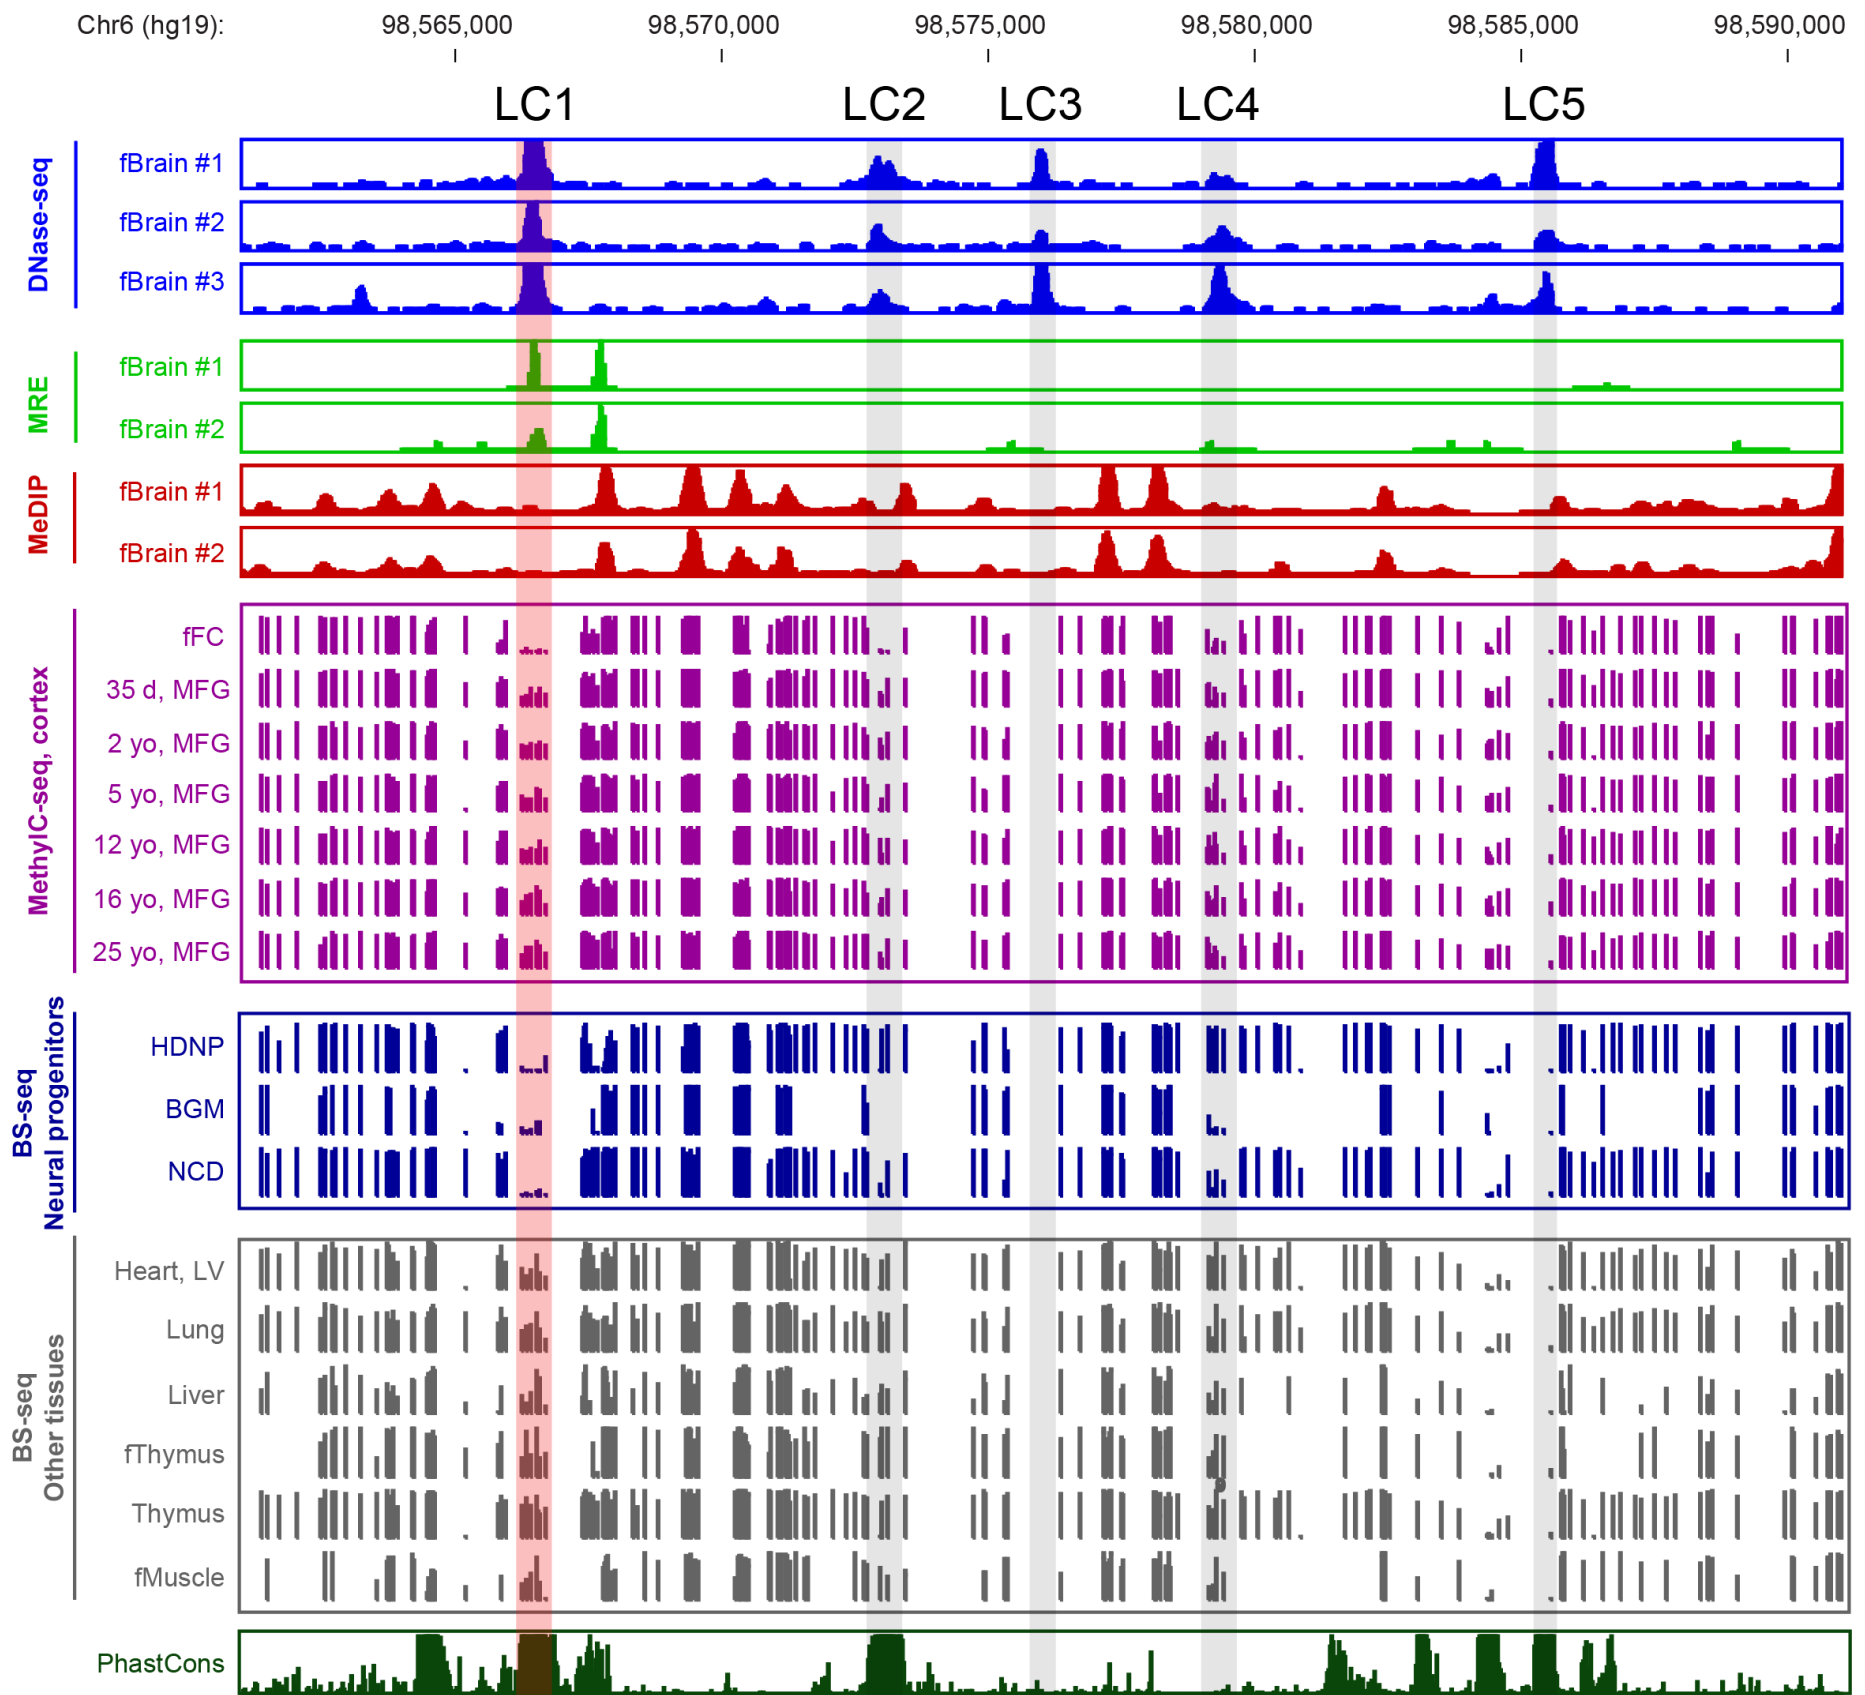

# Supplemental Figure S8

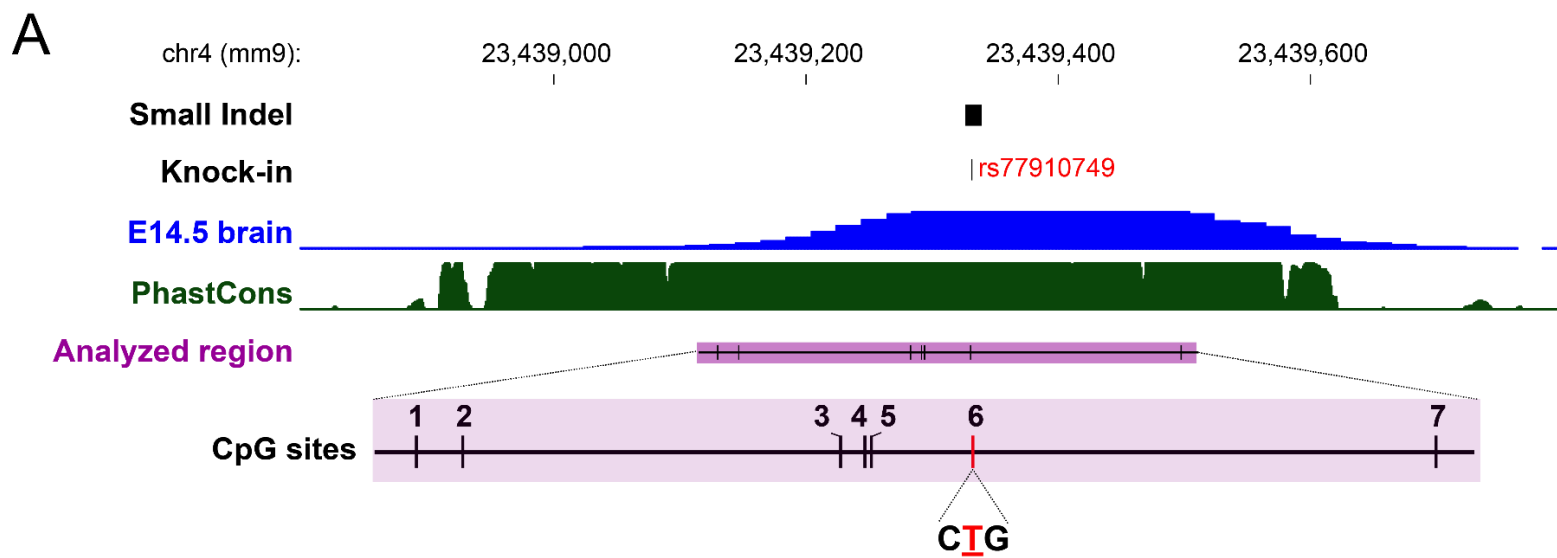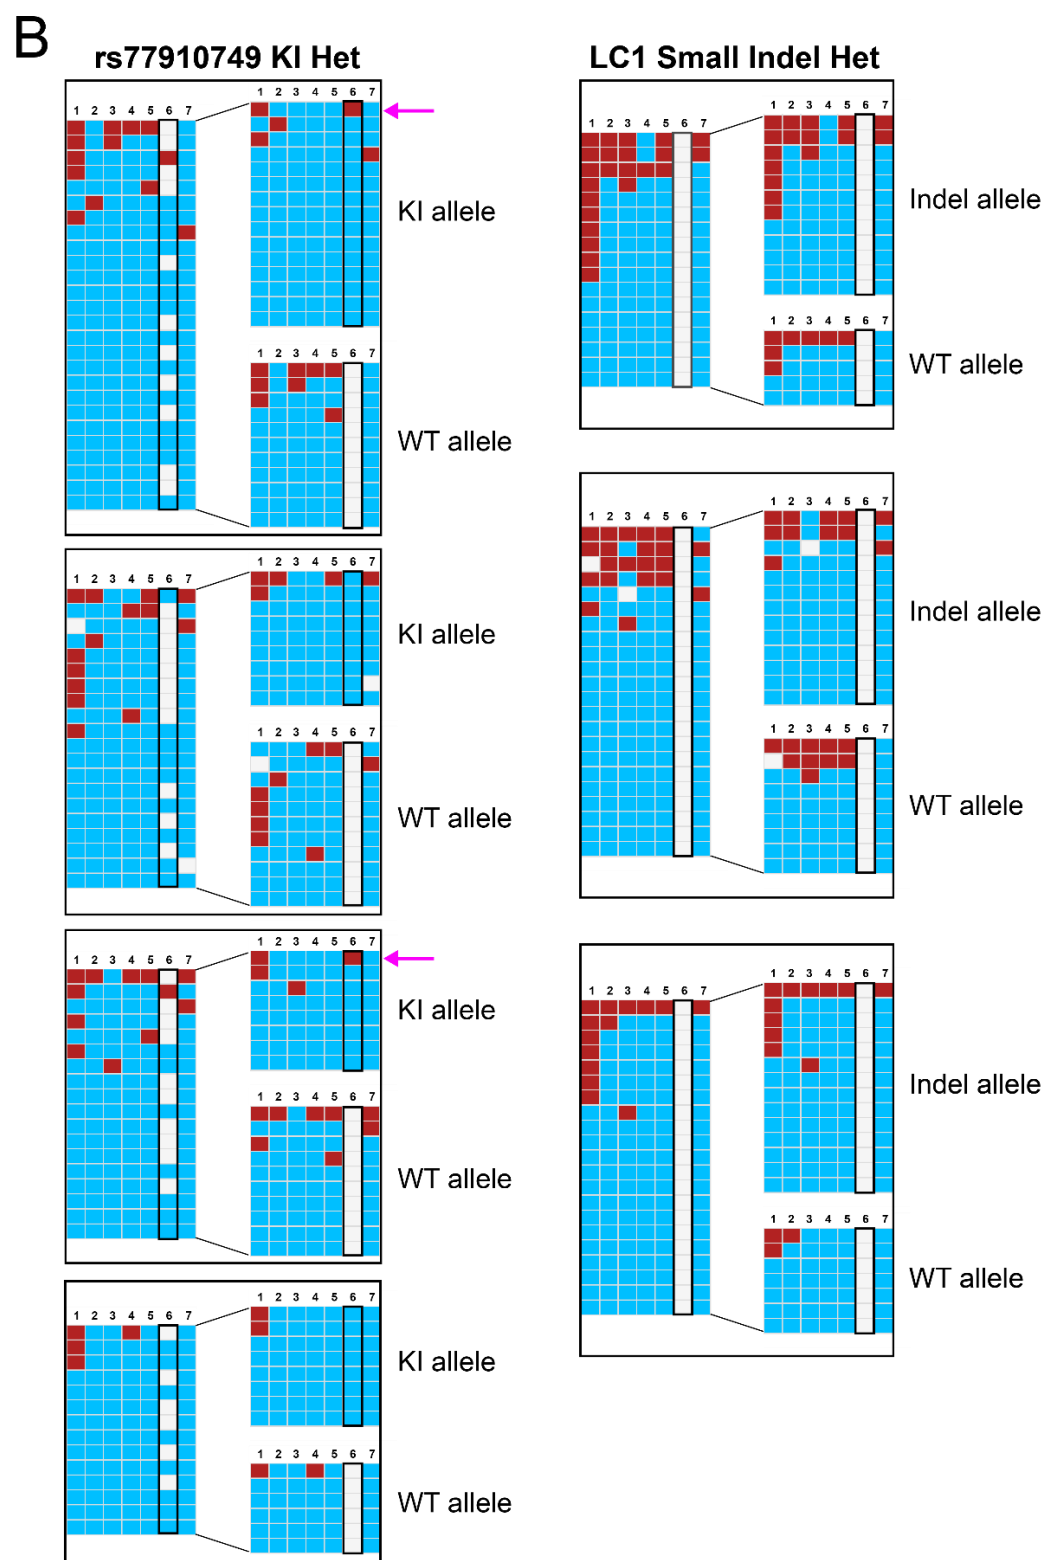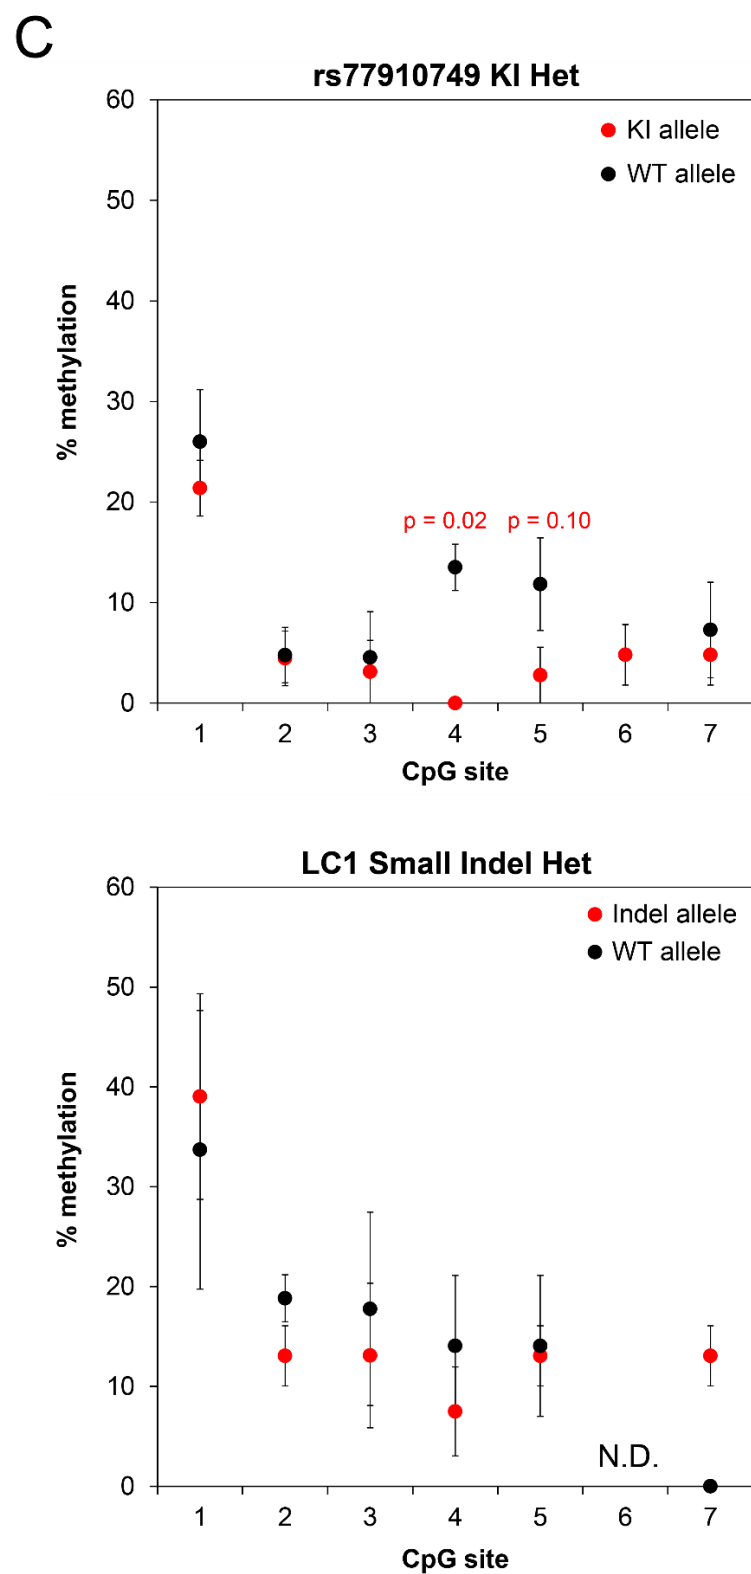



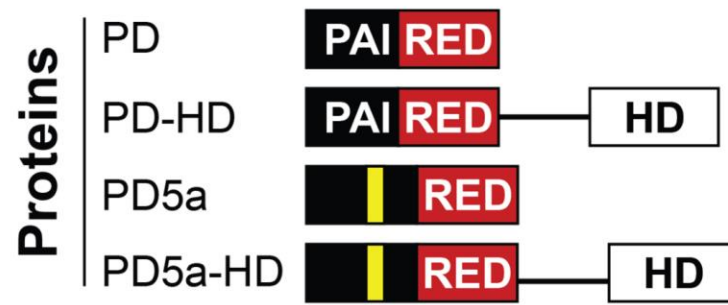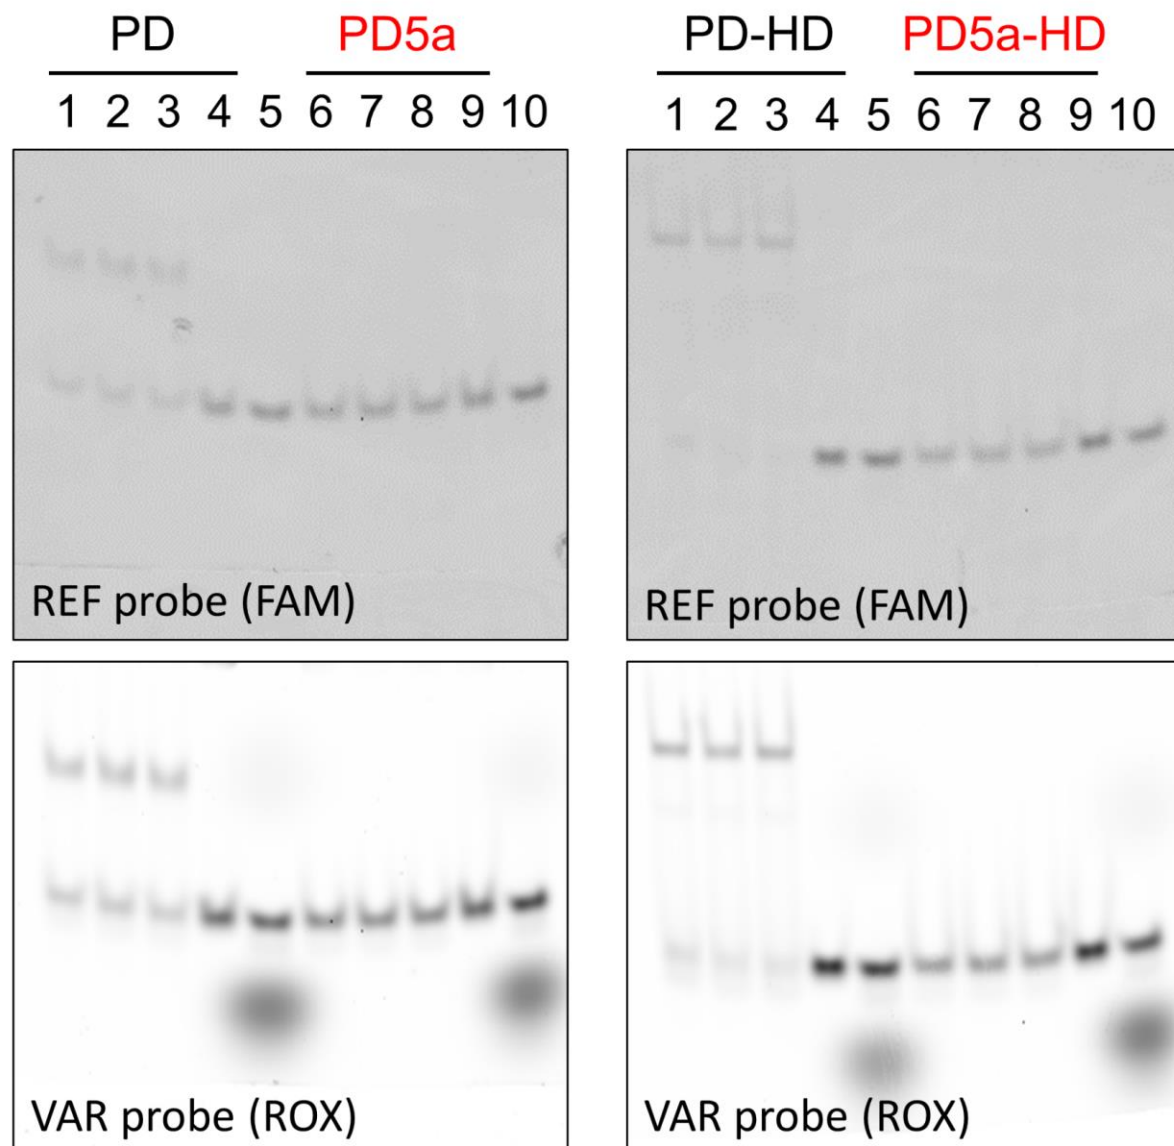

Day 53

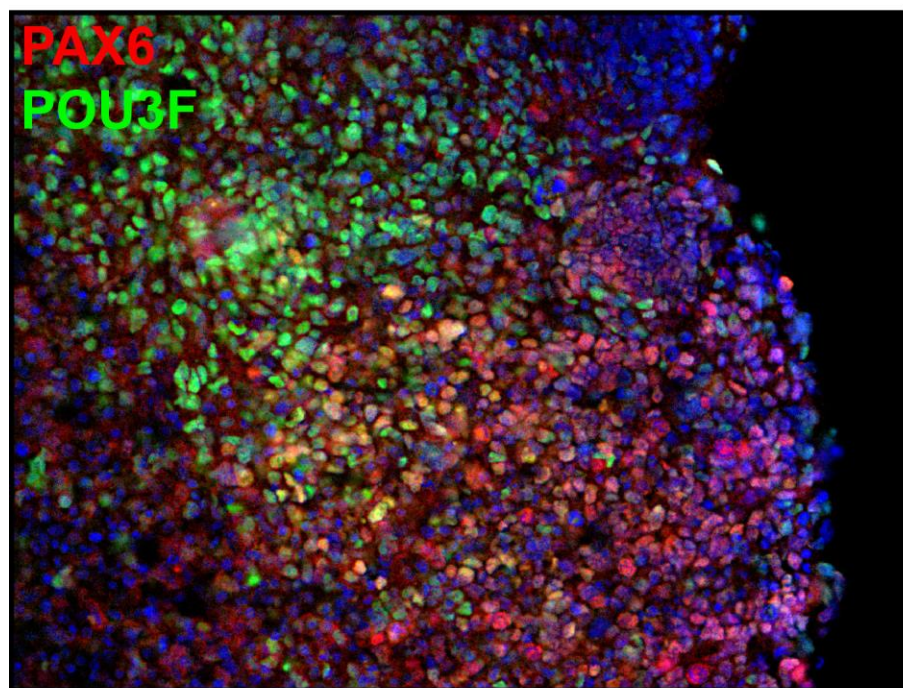

Day 79

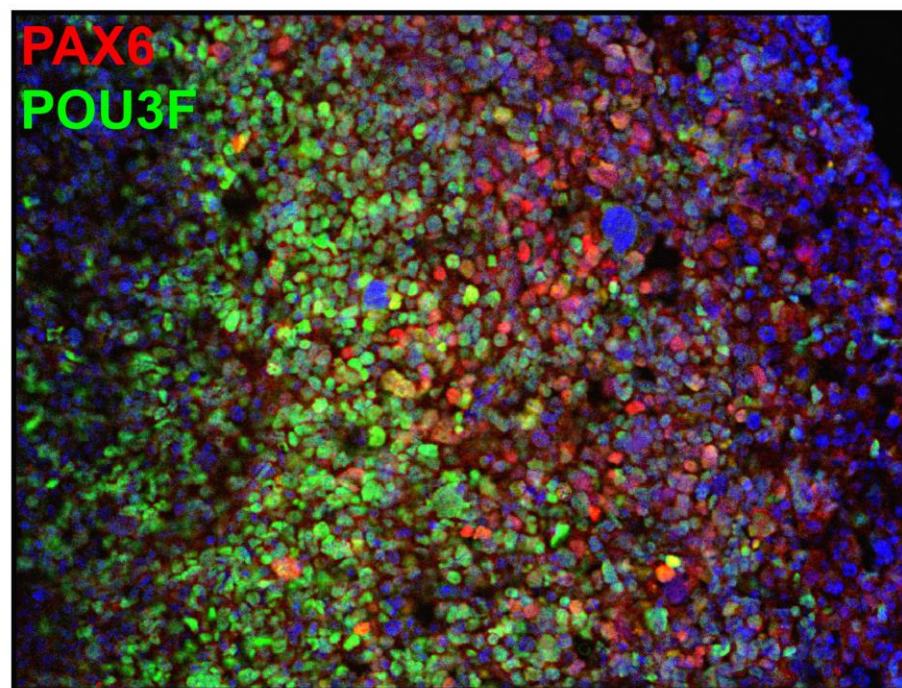

Day 53

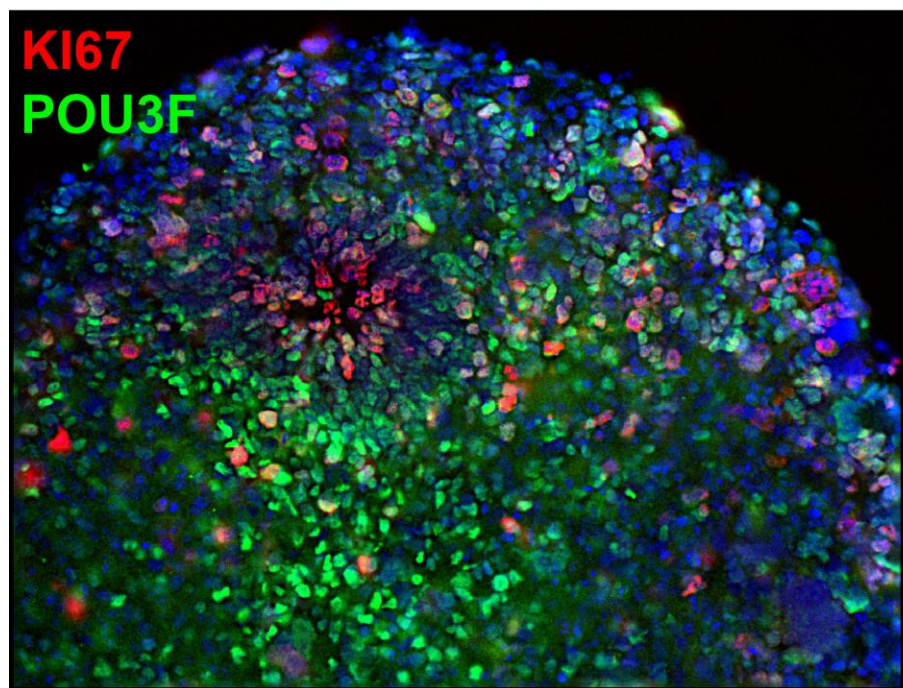

Day 70

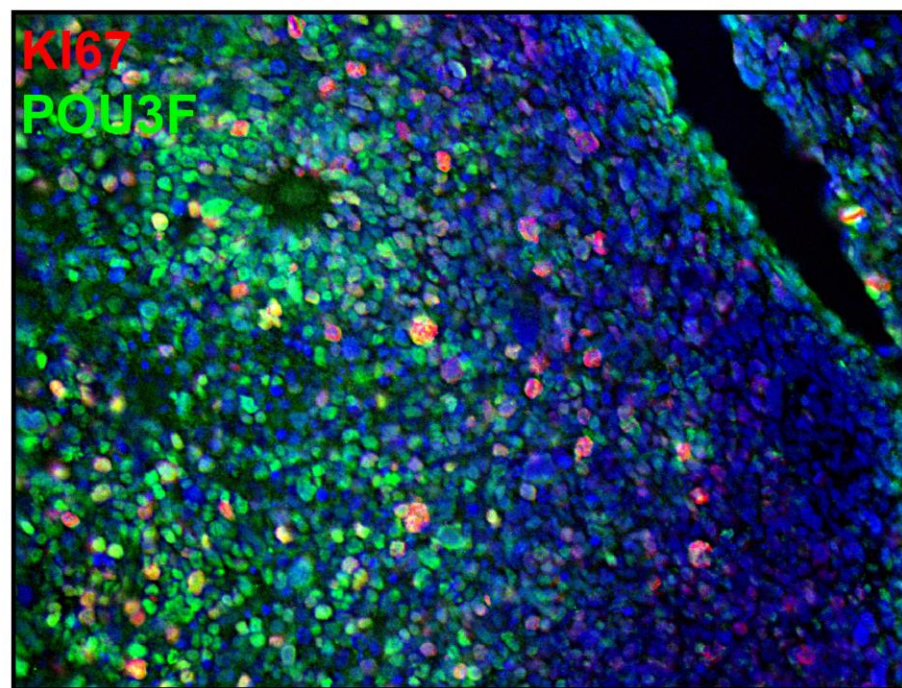

Supplement: Supplementary file [file media-2.pdf]
