# Supplementary material for: A candidate causal variant underlying both enhanced cognitive performance and increased risk of bipolar disorder
Source: bioRxiv or medRxiv preprint supplement (doi:10.1101/580258), 2021-10-28
Supplement: Supplementary file [file media-7.pdf]

## 1-HR LOCOMOTOR ACTIVITY

### AMBULATORY ACTIVITY

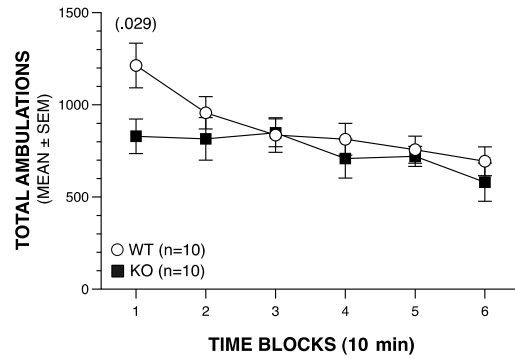

No significant effects involving Genotype or Sex.

### VERTICAL REARING FREQUENCY

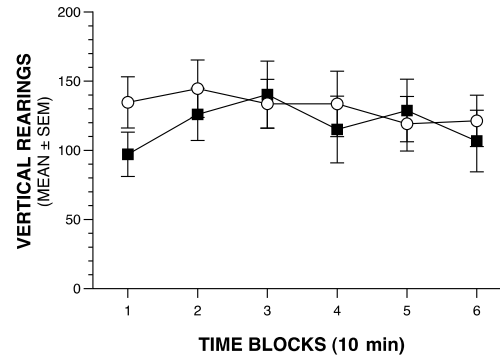

No significant effects involving Genotype or Sex and no significant comparisons.

### DISTANCE IN PERIPHERY

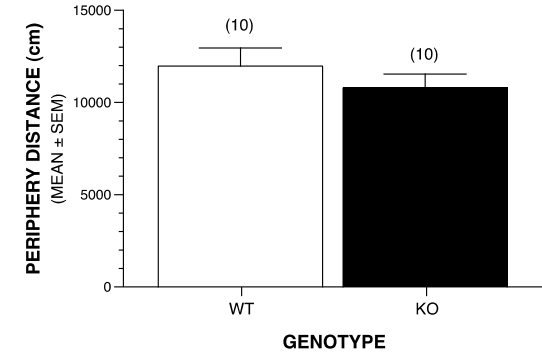

No significant effects involving Genotype or Sex.

### ENTRIES INTO CENTER

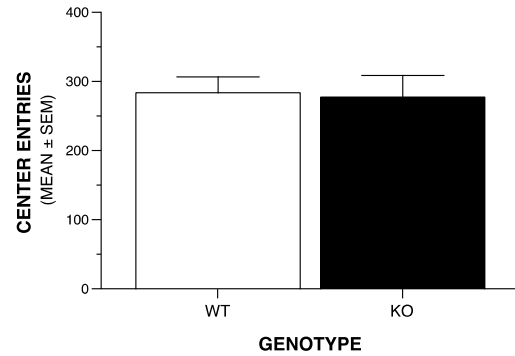

No significant effects involving Genotype or Sex.

### TIME IN CENTER

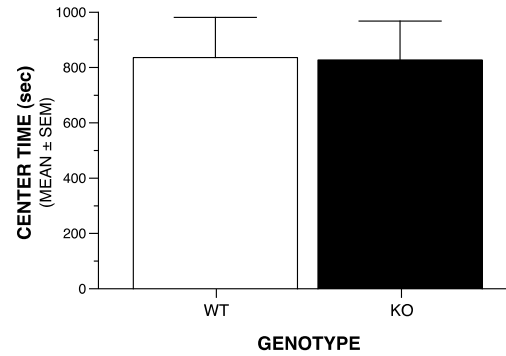

No significant effects involving Genotype or Sex.

### DISTANCE IN CENTER

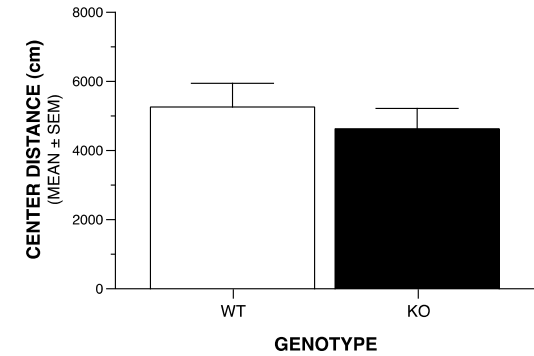

No significant effects involving Genotype or Sex.

**1-HR LOCOMOTOR ACTIVITY: FIRST 5 MIN.**

**DISTANCE IN PERIPHERY**

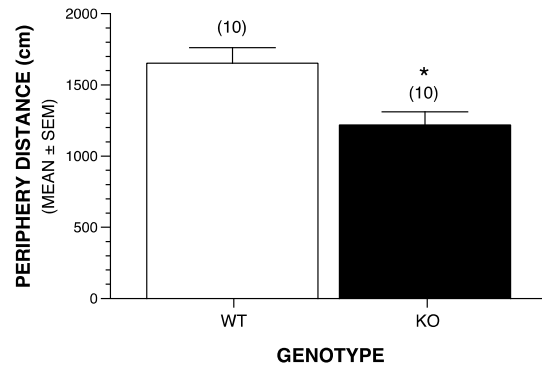

Significant Genotype effect: \* $p=0.10$ .

**DISTANCE IN CENTER**

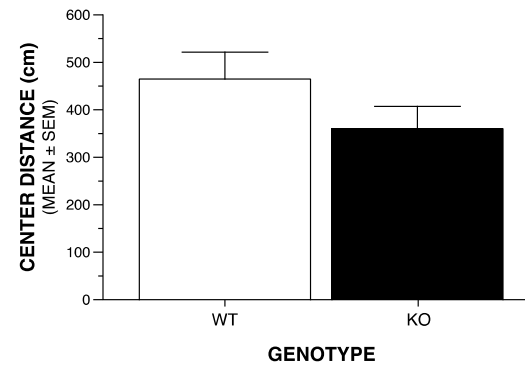

No significant effects involving Genotype or Sex.

**TIME IN CENTER**

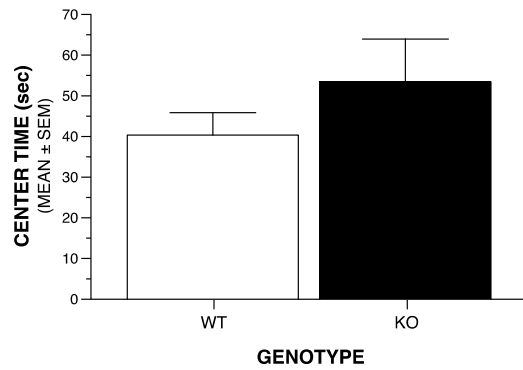

No significant effects involving Genotype or Sex.

**ENTRIES INTO CENTER**

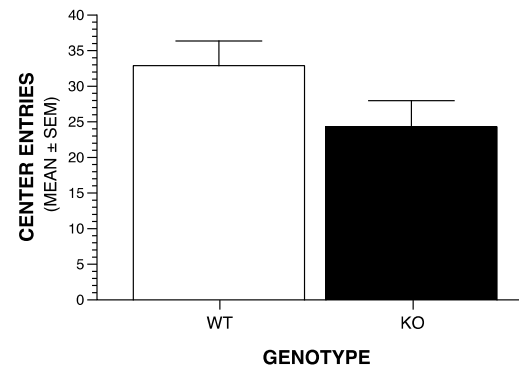

No significant effects involving Genotype or Sex.

## SENSORIMOTOR BATTERY

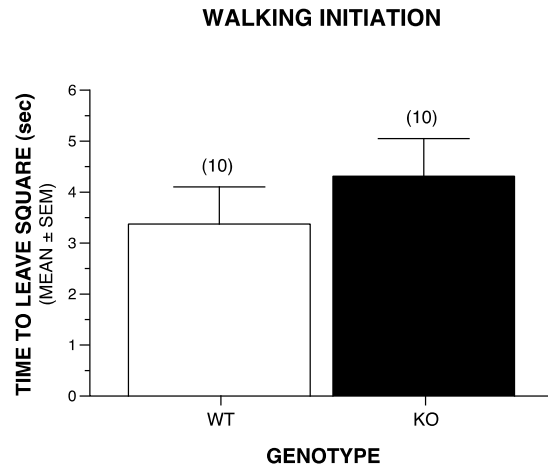

No significant effects involving Genotype or Sex.

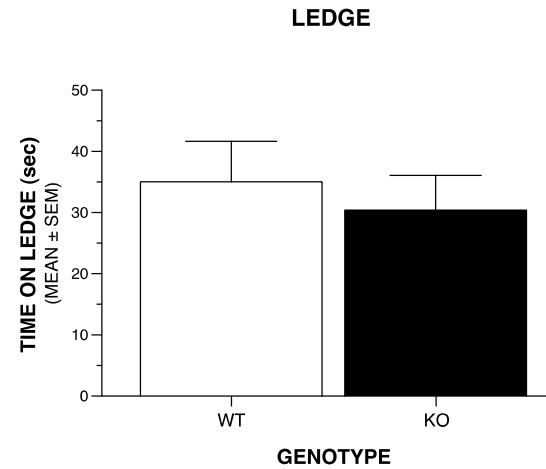

No significant effects involving Genotype or Sex.

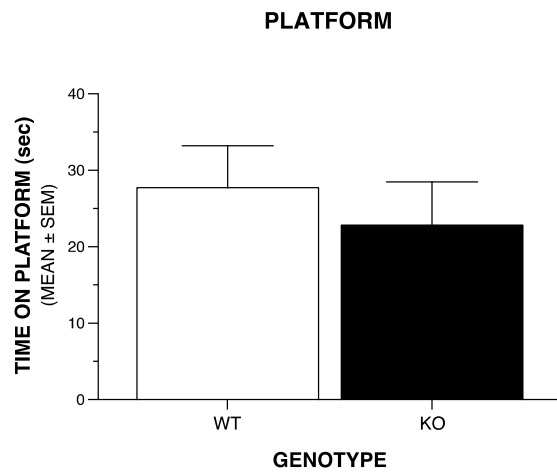

No significant effects involving Genotype or Sex.

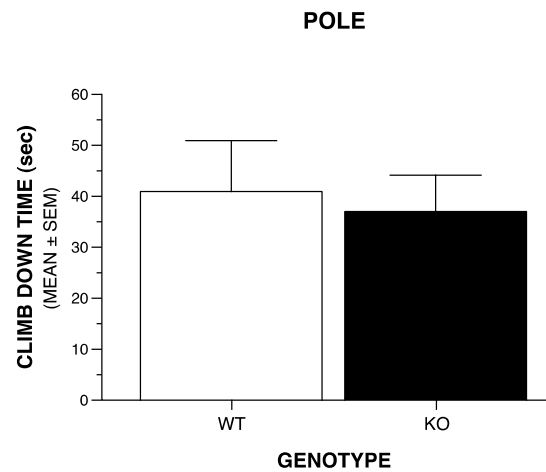

No significant effects involving Genotype or Sex.

## SENSORIMOTOR BATTERY: SCREEN TESTS

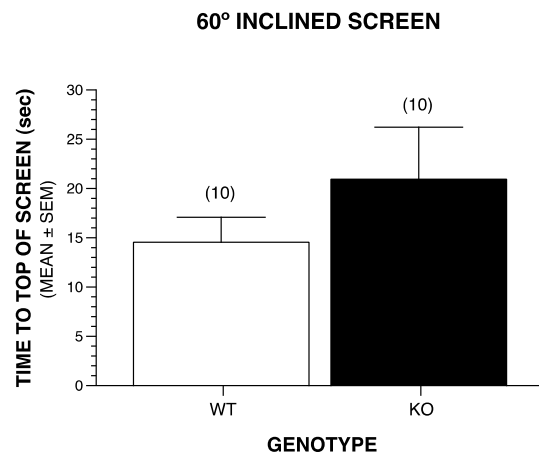

No significant effects involving Genotype or Sex.

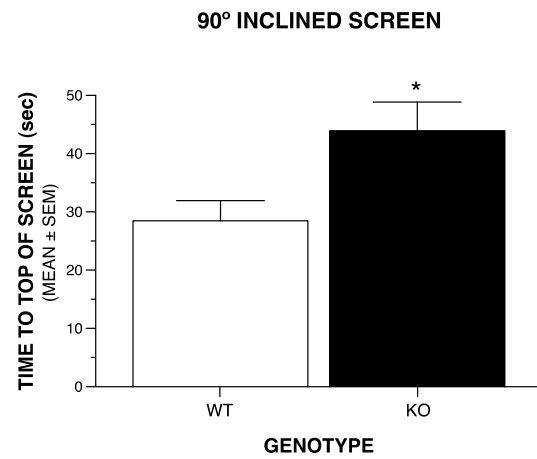

Significant Genotype effect (\* $p=0.015$ ).  
Sex effect:  $p=0.066$ .

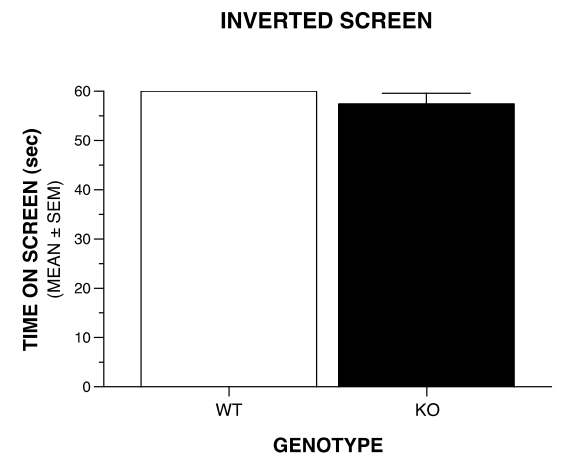

No significant effects involving Genotype or Sex.

## MORRIS WATER MAZE: CUED & PLACE TRIALS

### CUED TRIALS: PATH LENGTH

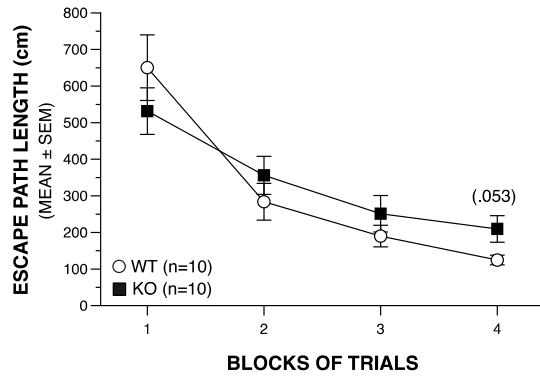

No significant effects involving Genotype or Sex and no significant comparisons.

### CUED TRIALS: LATENCY

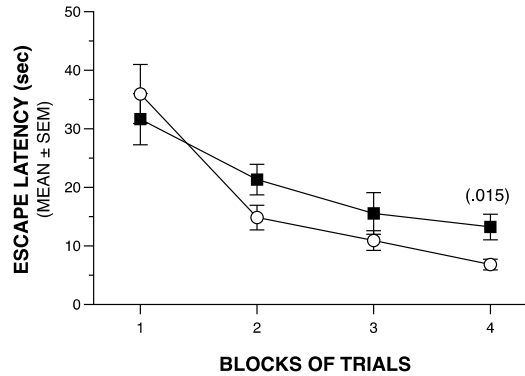

No significant effects involving Genotype, but a significant Sex effect ( $p=.041$ ).

### CUED TRIALS: SWIMMING SPEEDS

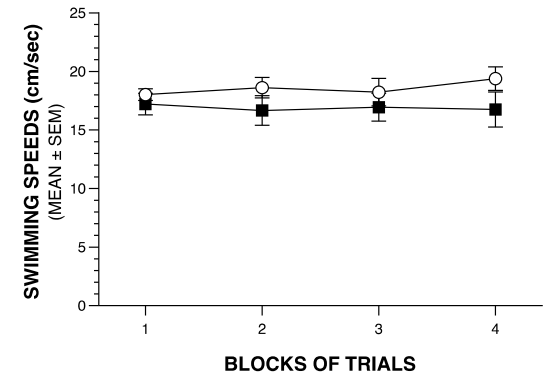

Significant Sex effect ( $p=.0003$ ), and Genotype x Sex interaction ( $p=.036$ ).

### PLACE TRIALS: PATH LENGTH

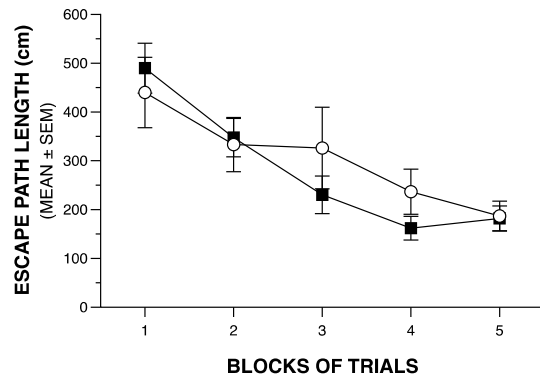

No significant effects involving Genotype or Sex and no significant comparisons.

### PLACE TRIALS: LATENCY

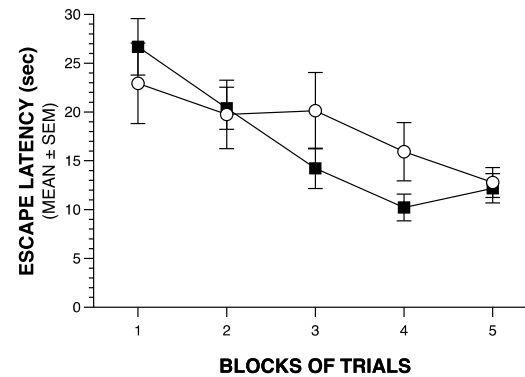

No significant effects involving Genotype or Sex and no significant comparisons.

### PLACE TRIALS: SWIMMING SPEEDS

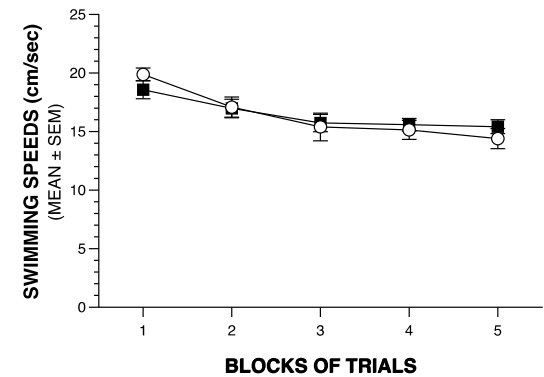

No significant effects involving Genotype or Sex and no significant comparisons.

## MORRIS WATER NAVIGATION: PROBE TRIAL

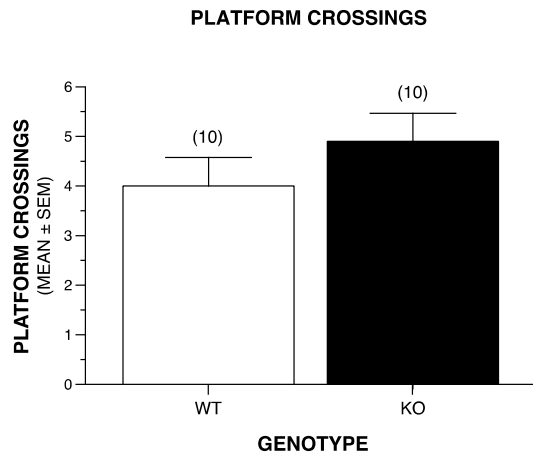

No significant effects involving Genotype or Sex.

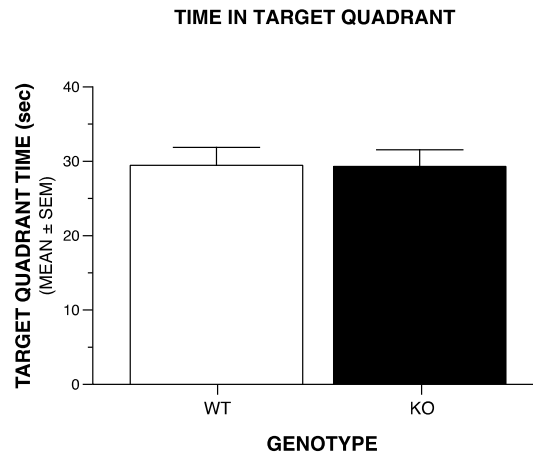

No significant effects involving Genotype or Sex.

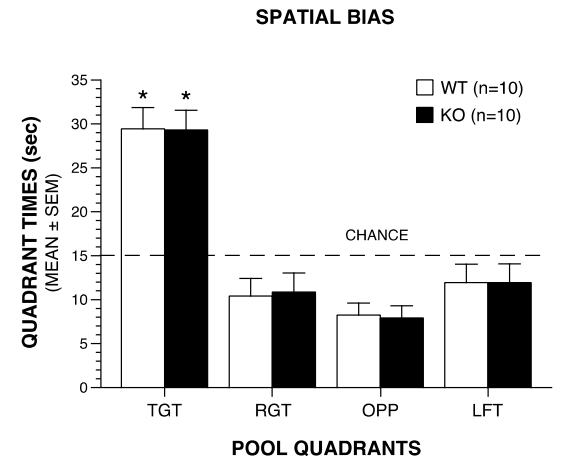

The WT and KO groups each showed spatial bias by spending significantly more time in the target quadrant vs each of the other quadrants (\* $p < .00005$ ).

## CONDITIONED FEAR

### DAY 1: BASELINE - T/S TRAINING

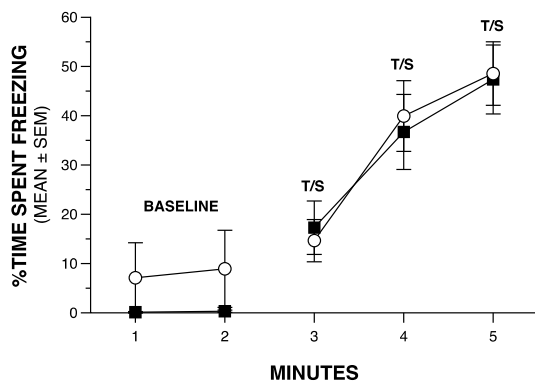

**BASELINE:** no significant effects involving Genotype or Sex and no significant comparisons.

**T/S TRAINING:** no significant effects involving Genotype but a significant Sex effect ( $p=.012$ ). No significant between-groups comparisons.

### DAY 2: CONTEXTUAL FEAR

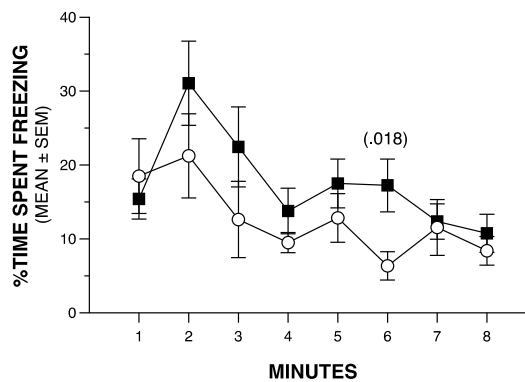

No significant effects involving Genotype or Sex.

### DAY 3: AUDITORY CUE

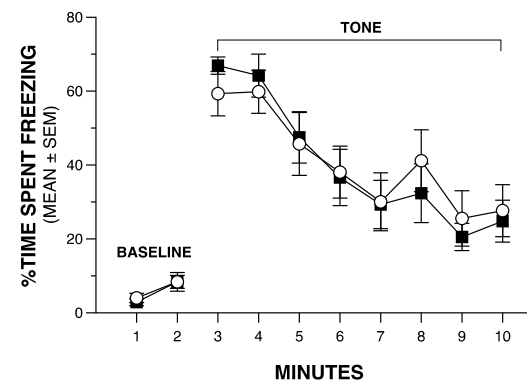

**BASELINE:** no significant effects involving Genotype or Sex and no significant comparisons.

**AUDITORY CUE:** no significant effects involving Genotype, but a significant Sex x Minutes interaction ( $p=.003$ ). No significant between-groups comparisons.

## ACOUSTIC STARTLE/PPI & VOS

### ACOUSTIC STARTLE

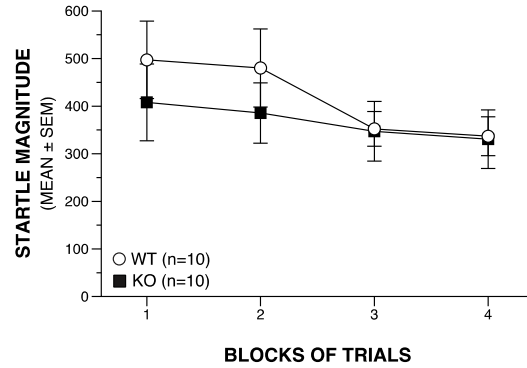

No significant effects involving Genotype or Sex and no significant comparisons.

### % OF MICE SIGNIFICANTLY STARTLED

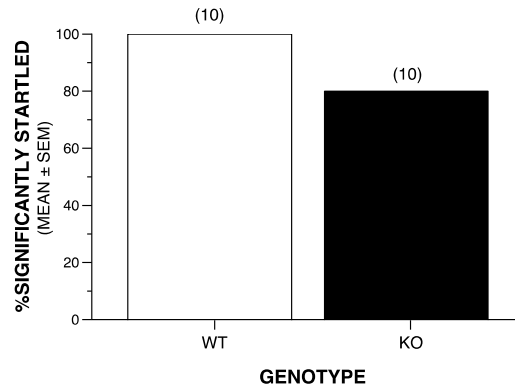

10/10 WT and 8/10 KO mice showed a significant startle response compared to levels during no stimulus trials.

### UNTRANSFORMED PPI DATA

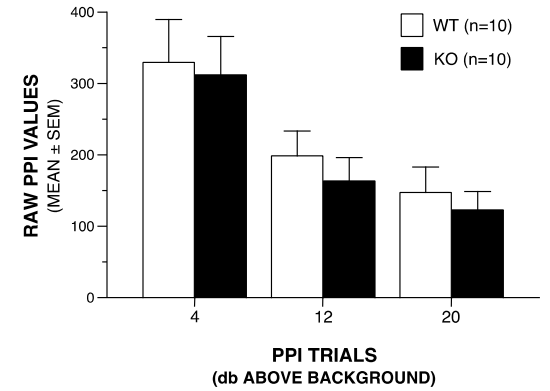

### TOTAL MEAN %PPI

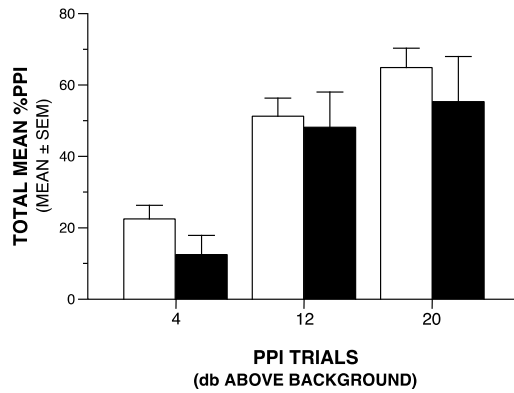

No significant effects involving Genotype and no significant comparisons.

### BODY WEIGHTS AT TESTING

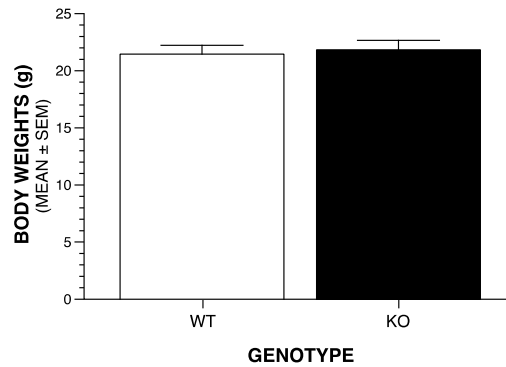

No significant effects involving Genotype but a significant Sex effect ( $p=0.001$ ).



## ELEVATED PLUS MAZE: OPEN ARM VARIABLES

### ENTRIES INTO OPEN ARMS

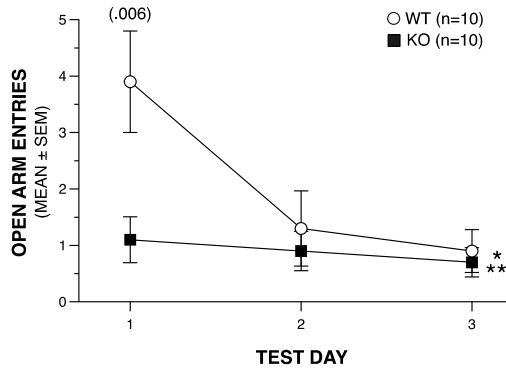

Significant Genotype effect (\* $p=.049$ ), and Genotype x Test Day (\*\* $p=.011$ ) and Genotype x Sex x Test Day ( $p=.017$ ) interactions.

### TIME IN OPEN ARMS

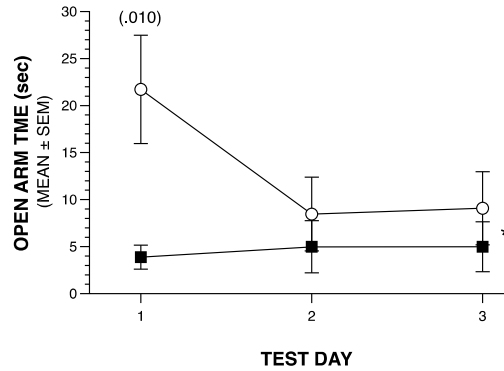

Significant Genotype x Test Day interaction (\* $p=.038$ ), but no significant effects involving Sex. Genotype effect:  $p=.051$ .

### DISTANCE TRAVELED IN OPEN ARMS

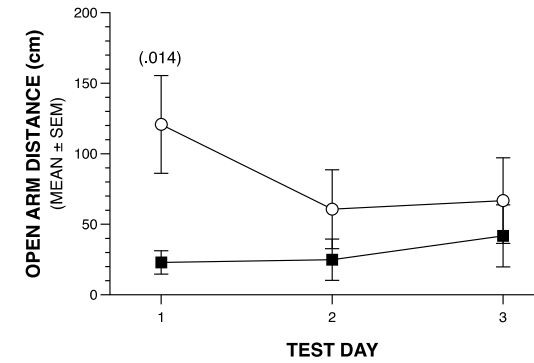

No significant effects involving Genotype or Sex. Genotype effect:  $p=.062$ .

### % OF TOTAL ARM ENTRIES MADE INTO OPEN ARMS

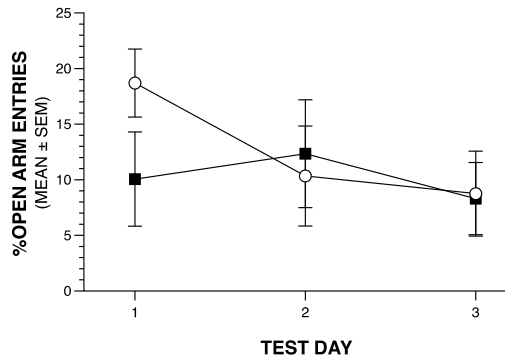

No significant effects involving Genotype or Sex and no significant between-group comparisons.

### % OF TOTAL ARM TIME SPENT IN OPEN ARMS

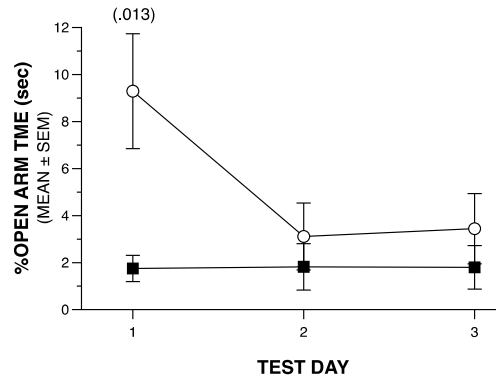

Significant Genotype x Test Day interaction (\* $p=.031$ ), but no significant effects involving Sex. Genotype effect:  $p=.052$ .

### % OF TOTAL ARM DISTANCE TRAVELED IN OPEN ARMS

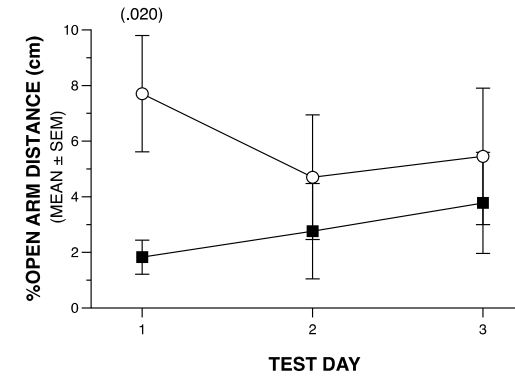

No significant effects involving Genotype or Sex.

# ELEVATED PLUS MAZE

## DISTANCE VARIABLES

### TOTAL DISTANCE TRAVELED

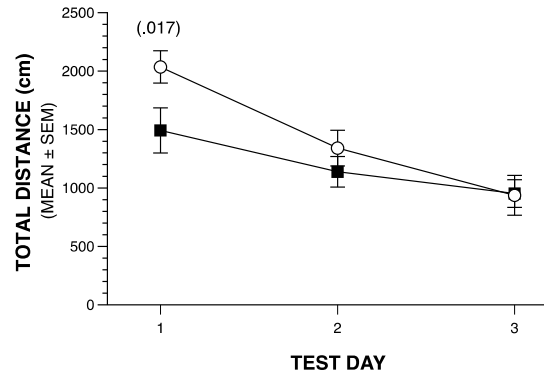

No significant effects involving Genotype or Sex.

### DISTANCE TRAVELED IN CLOSED ARMS

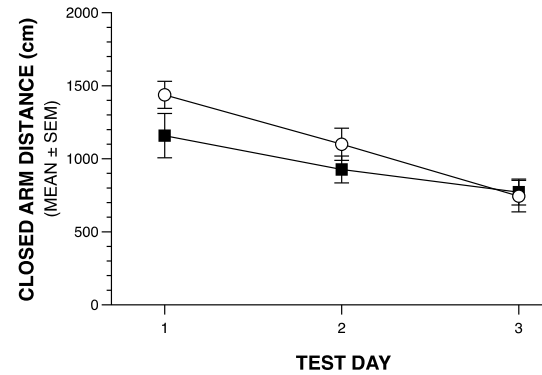

No significant effects involving Genotype or Sex and no significant between-group comparisons.

### DISTANCE TRAVELED IN CENTER

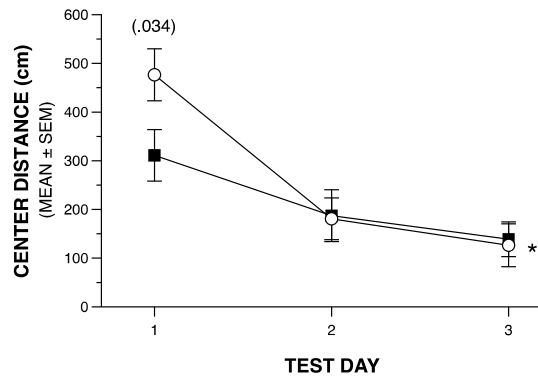

Significant Genotype x Test Day (\* $p=.009$ ), and Sex x Test Day ( $p=.045$ ) interactions.

### DISTANCE TRAVELED IN OPEN ARMS

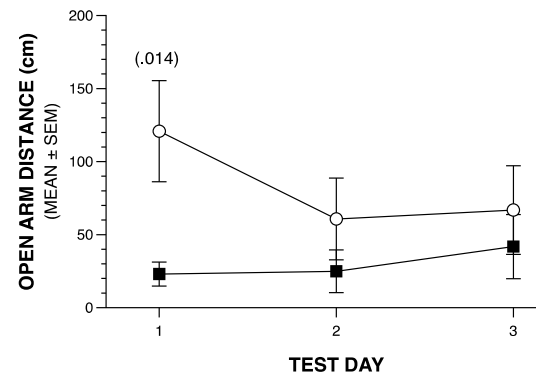

No significant effects involving Genotype or Sex. Genotype effect:  $p=.062$ .

# 1-HR OPEN-FIELD ACTIVITY/EXPLORATORY BEHAVIOR

## ZONE ANALYSES

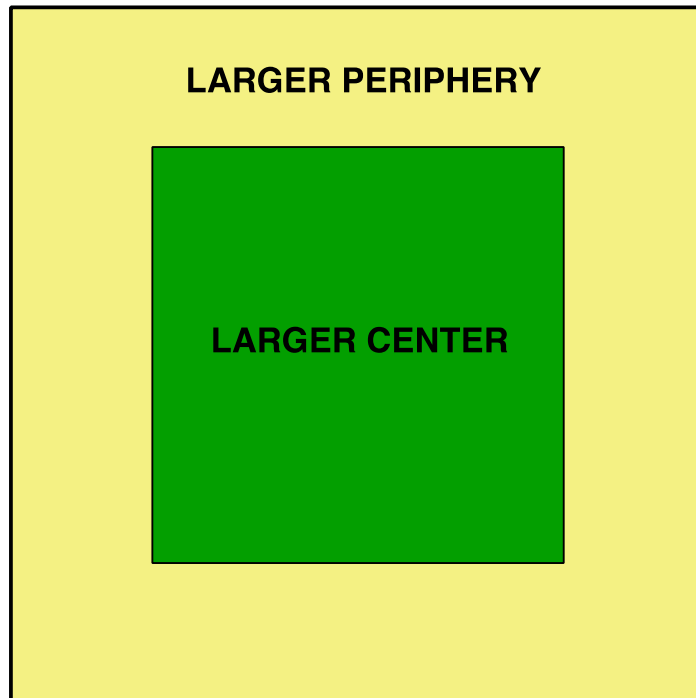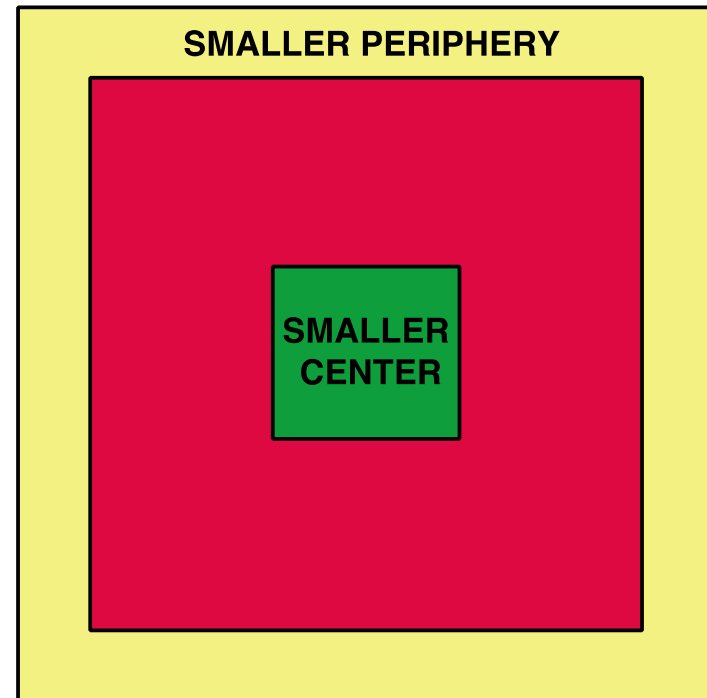

## 1-HR OPEN-FIELD ACTIVITY/EXPLORATORY BEHAVIOR

### DISTANCE IN "LARGER" PERIPHERY

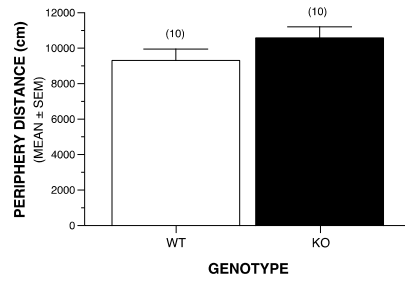

No significant effects involving Group or Sex.

### DISTANCE IN "LARGER" CENTER

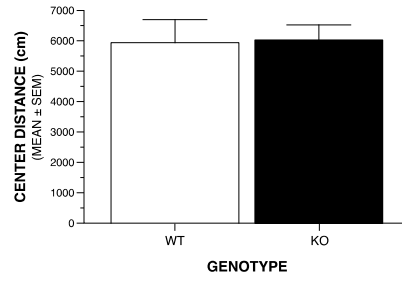

No significant effects involving Group or Sex.

### TIME IN "LARGER" CENTER

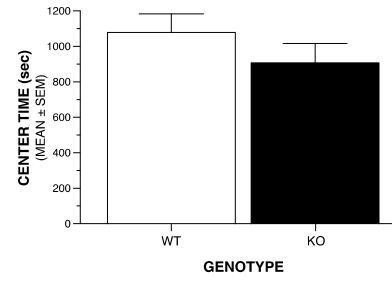

No significant effects involving Group or Sex.

### ENTRIES INTO "LARGER" CENTER

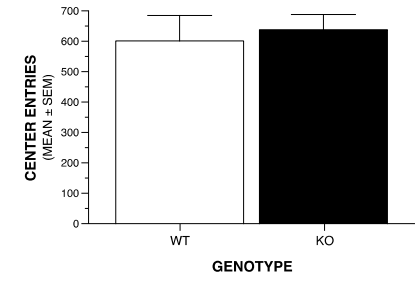

No significant effects involving Group or Sex.

### DISTANCE IN "SMALLER" PERIPHERY

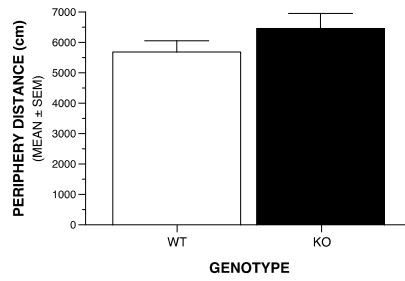

No significant effects involving Group or Sex.

### DISTANCE IN "SMALLER" CENTER

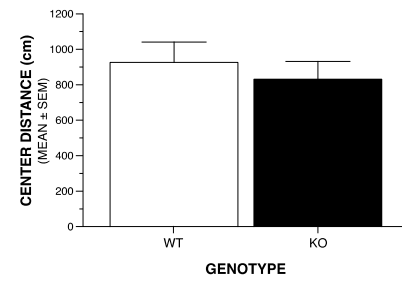

No significant effects involving Group or Sex.

### TIME IN "SMALLER" CENTER

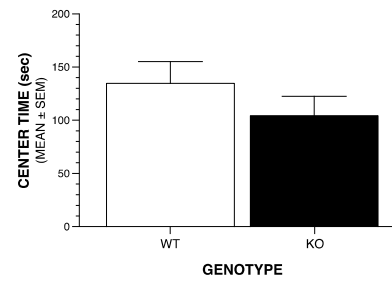

No significant effects involving Group or Sex.

### ENTRIES INTO "SMALLER" CENTER

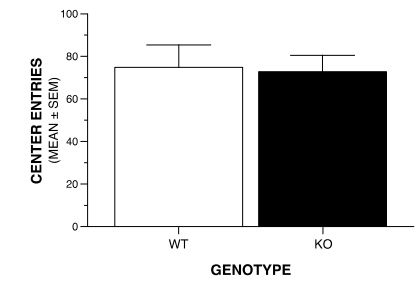

No significant effects involving Group or Sex.

## 1-HR OPEN-FIELD ACTIVITY/EXPLORATORY BEHAVIOR

### AMBULATORY ACTIVITY

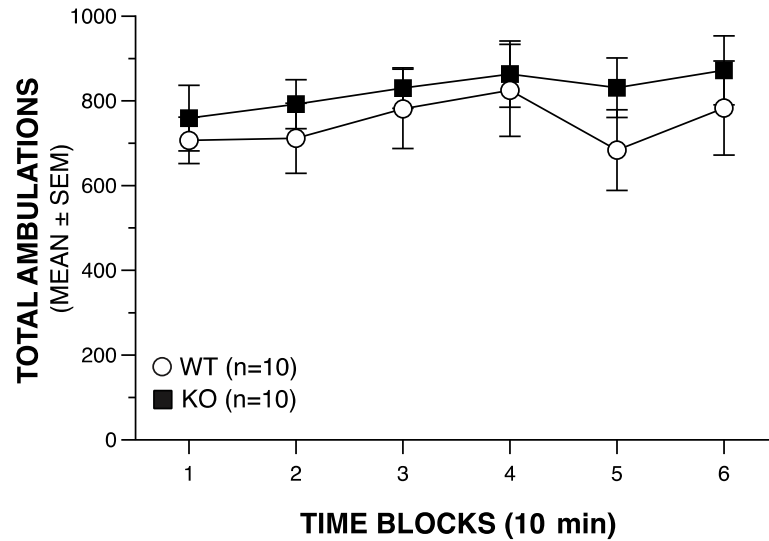

No significant effects involving Genotype or Sex and no significant comparisons.

### VERTICAL REARING FREQUENCY

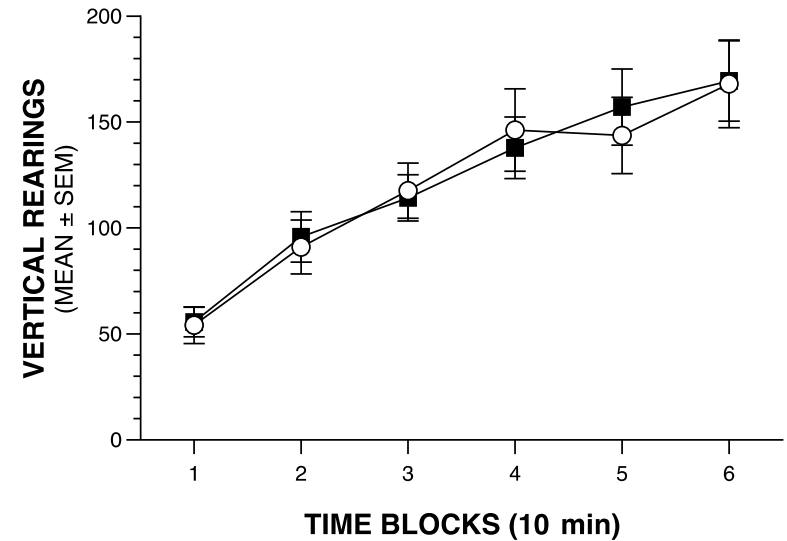

No significant effects involving Genotype or Sex and no significant comparisons.
