# Supplementary material for: A candidate causal variant underlying both enhanced cognitive performance and increased risk of bipolar disorder
Source: bioRxiv or medRxiv preprint supplement (doi:10.1101/580258), 2021-10-28
Supplement: Supplementary file [file media-8.pdf]

## 1-HR LOCOMOTOR ACTIVITY

### AMBULATORY ACTIVITY

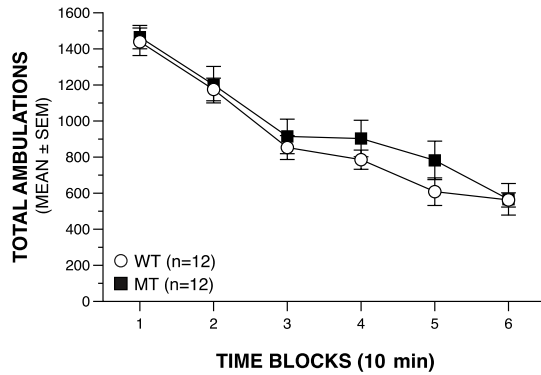

No significant effects involving Genotype or Sex and no significant between-groups comparisons.

### REARING FREQUENCY

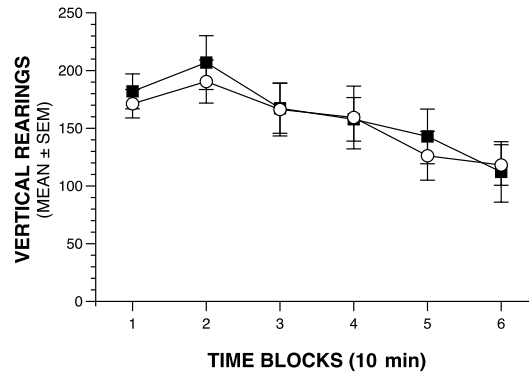

No significant effects involving Genotype, but a significant Sex x Time interaction ( $p=0.018$ ). No significant between-groups comparisons.

### DISTANCE IN PERIPHERY

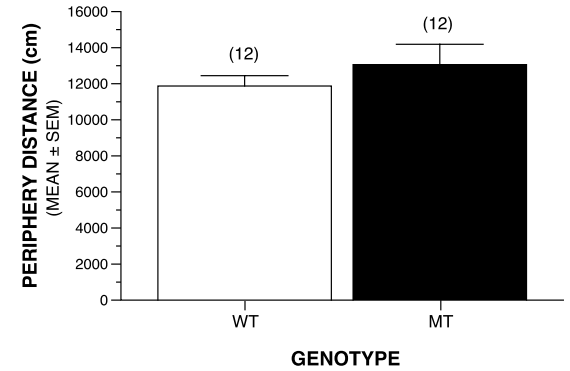

No significant effects involving Genotype or Sex.

### ENTRIES INTO CENTER

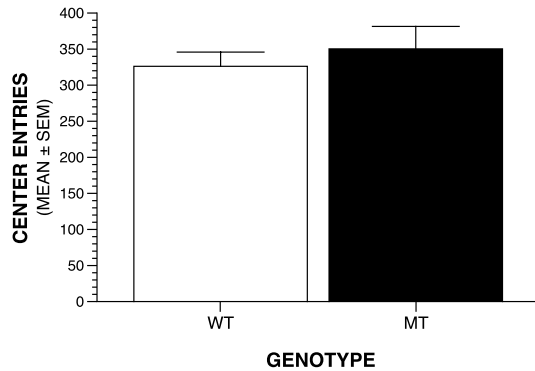

No significant effects involving Genotype or Sex.

### TIME IN CENTER

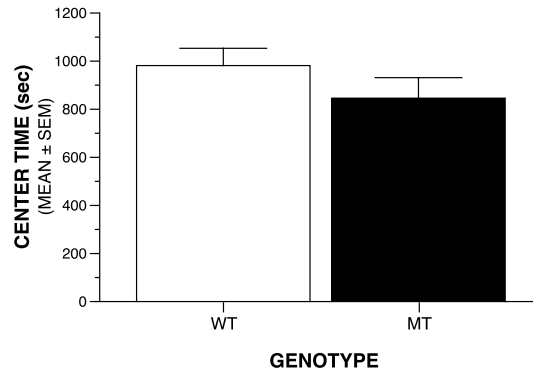

No significant effects involving Genotype or Sex.

### DISTANCE IN CENTER

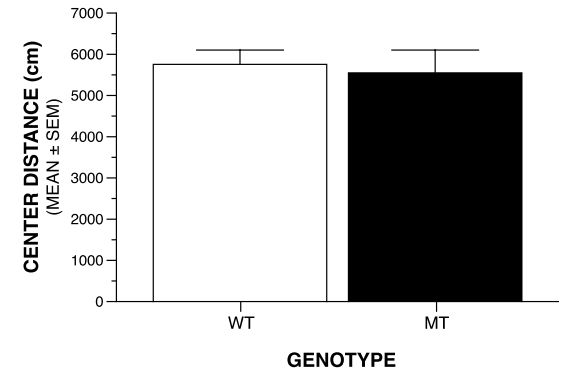

No significant effects involving Genotype or Sex.

# SENSORIMOTOR BATTERY

## WALKING INITIATION

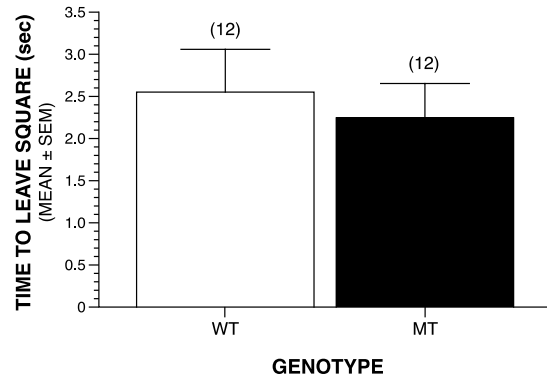

No significant effects involving Genotype or Sex.

## LEDGE

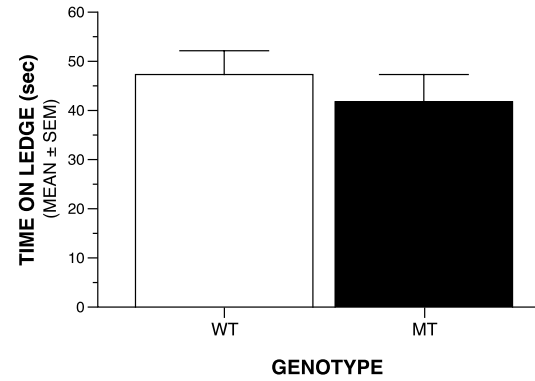

No significant effects involving Genotype or Sex.

## PLATFORM

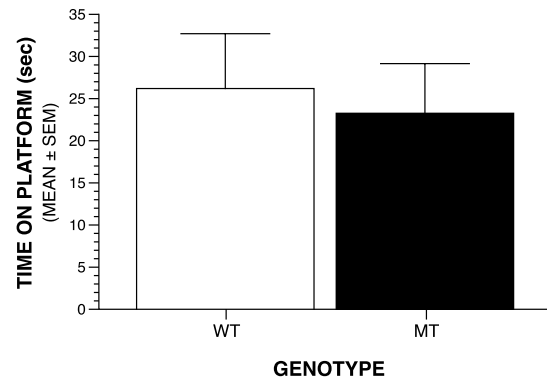

No significant effects involving Genotype or Sex.

## POLE

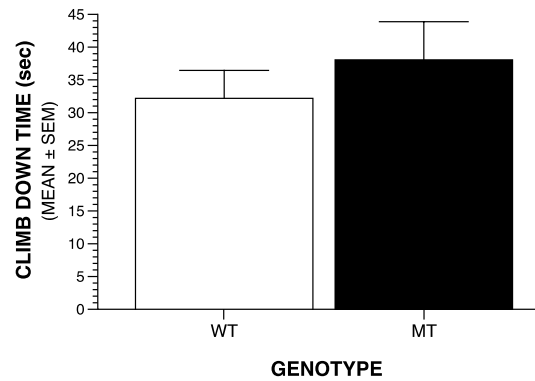

No significant effects involving Genotype or Sex.

**SENSORIMOTOR BATTERY: SCREEN TESTS**

**60° INCLINED SCREEN**

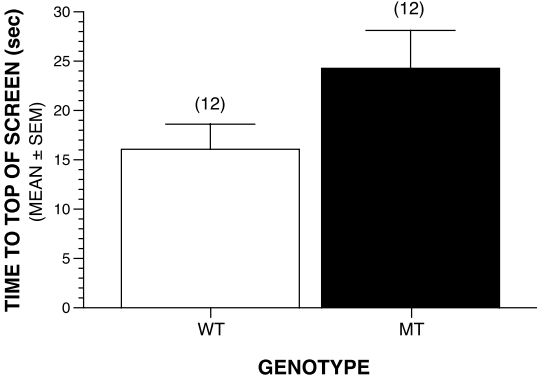

No significant effects involving Genotype or Sex. Genotype effect:  $p=.071$ .

**90° INCLINED SCREEN**

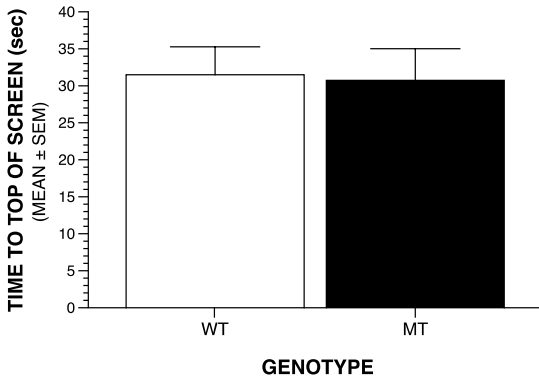

No significant effects involving Genotype or Sex.

**INVERTED SCREEN**

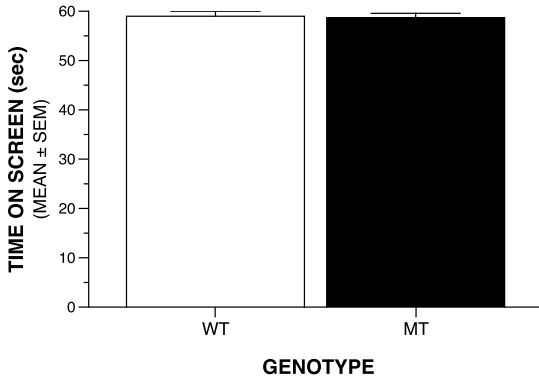

No significant effects involving Genotype or Sex.

## MORRIS WATER MAZE: CUED & PLACE TRIALS

### CUED TRIALS: PATH LENGTH

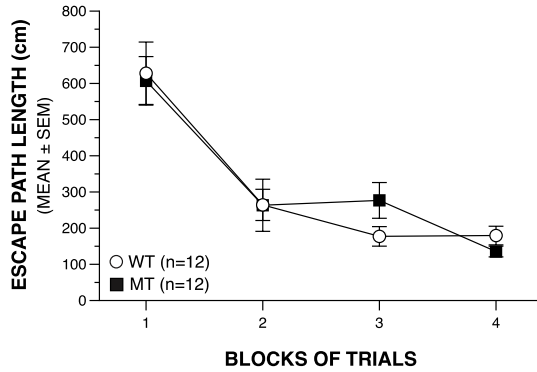

No significant effects involving Genotype or Sex and no significant comparisons.

### CUED TRIALS: LATENCY

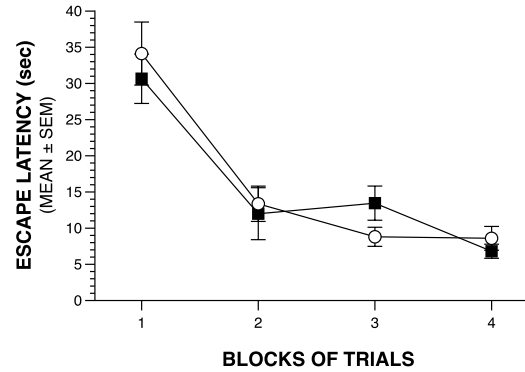

No significant effects involving Group or Sex and no significant comparisons.

### CUED TRIALS: SWIMMING SPEEDS

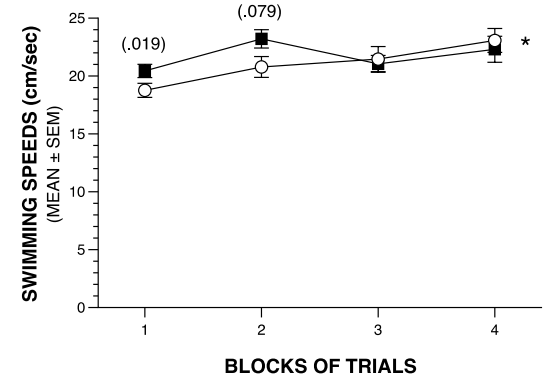

Significant Sex effect ( $p=.018$ ), and Group x Blocks of Trials interaction ( $*p=.035$ ).

### PLACE TRIALS: PATH LENGTH

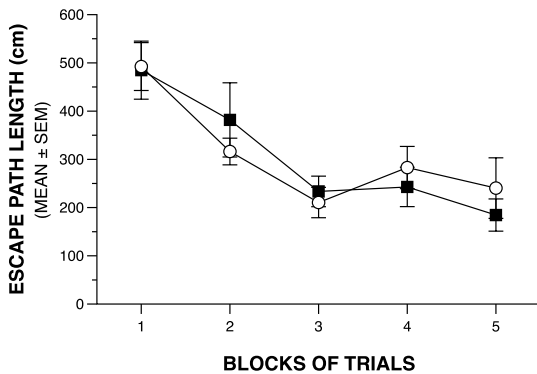

No significant effects involving Genotype or Sex and no significant comparisons.

### PLACE TRIALS: LATENCY

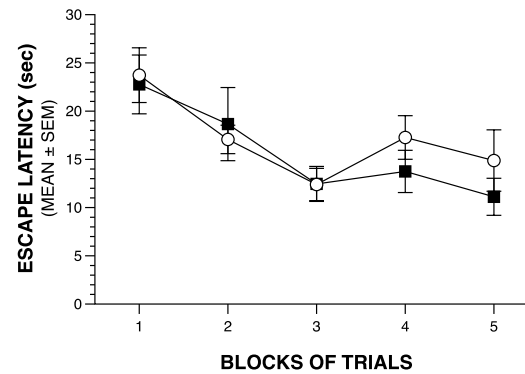

No significant effects involving Genotype or Sex and no significant comparisons.

### PLACE TRIALS: SWIMMING SPEEDS

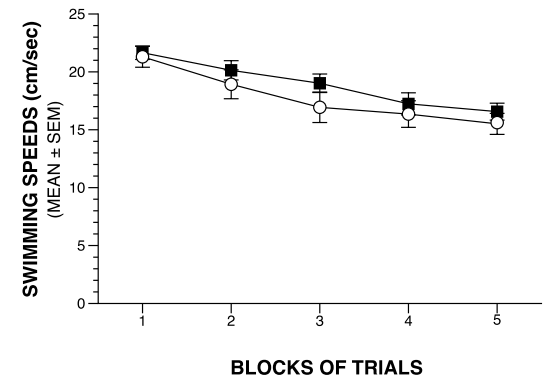

No significant effects involving Genotype, but a significant Sex effect ( $p=.018$ ).

## MORRIS WATER NAVIGATION: PROBE TRIAL

### PLATFORM CROSSINGS

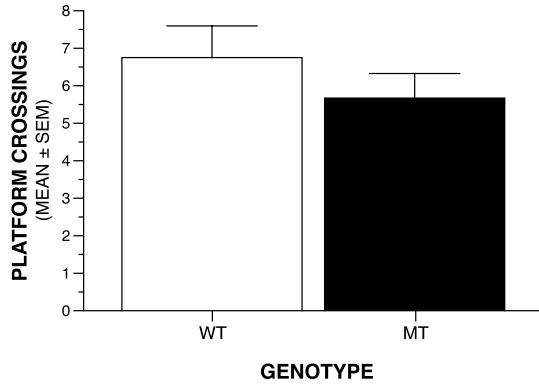

No significant effects involving Genotype or Sex.

### TIME IN TARGET QUADRANT

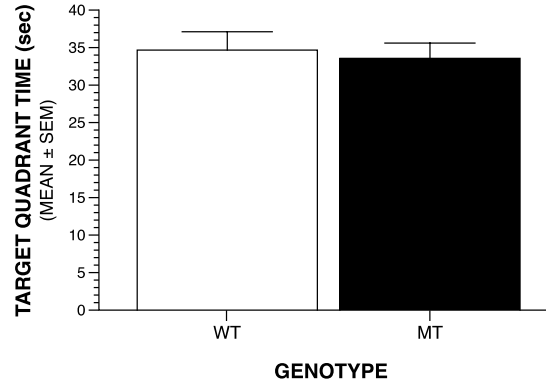

No significant effects involving Genotype or Sex.

### SPATIAL BIAS

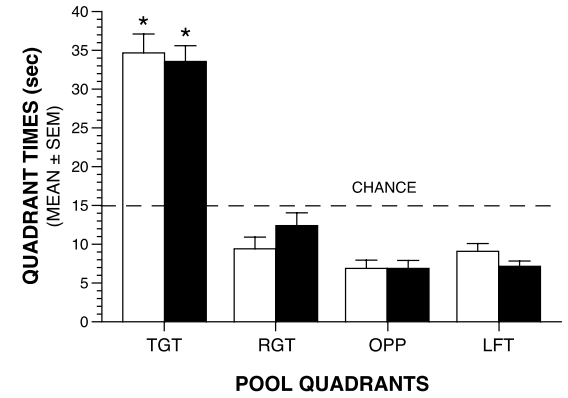

The WT and MT groups each showed spatial bias for the target quadrant by spending significantly (\* $p < 0.00005$ ) more time in the target quadrant vs each of the other quadrants.

## ELEVATED PLUS MAZE: OPEN ARM VARIABLES

### TIME IN OPEN ARMS

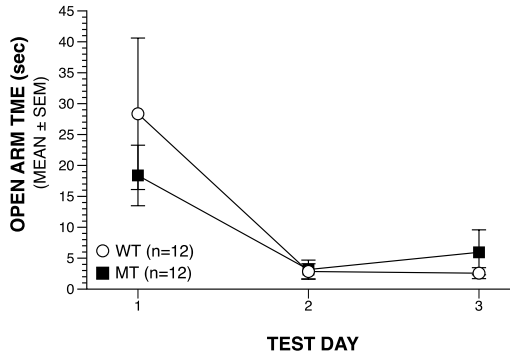

No significant effects involving Genotype or Sex and no significant comparisons.

### ENTRIES INTO OPEN ARMS

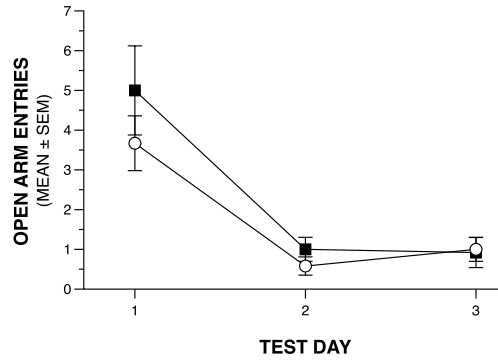

No significant effects involving Genotype or Sex and no significant comparisons.

### DISTANCE TRAVELED IN OPEN ARMS

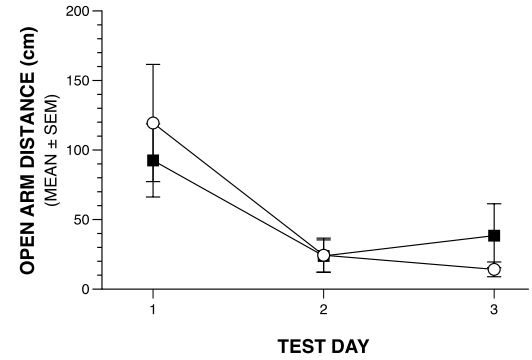

No significant effects involving Genotype or Sex and no significant comparisons.

### % OF TOTAL ARM TIME SPENT IN OPEN ARMS

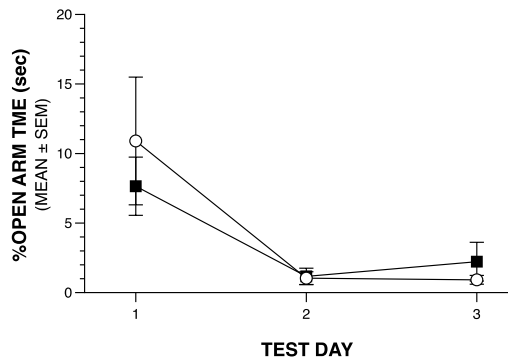

No significant effects involving Genotype or Sex and no significant comparisons.

### % OF TOTAL ARM ENTRIES MADE INTO OPEN ARMS

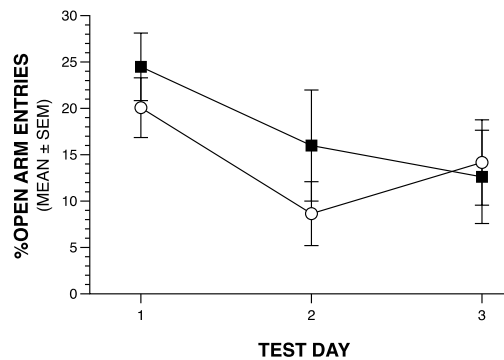

No significant effects involving Genotype or Sex and no significant comparisons.

### % OF TOTAL ARM DISTANCE TRAVELED IN OPEN ARMS

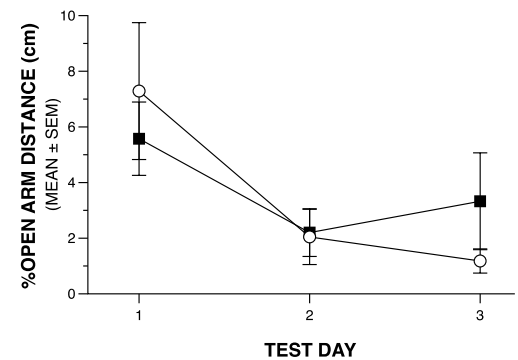

No significant effects involving Genotype or Sex and no significant comparisons.

# ELEVATED PLUS MAZE

## DISTANCE VARIABLES

### TOTAL DISTANCE TRAVELED

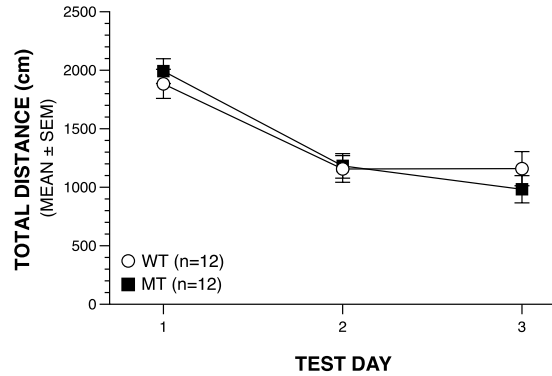

No significant effects involving Genotype or Sex and no significant comparisons.

### DISTANCE TRAVELED IN CLOSED ARMS

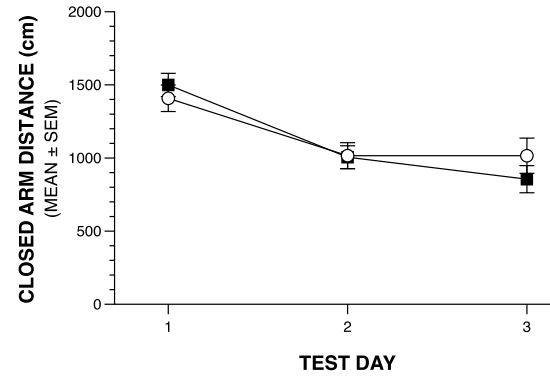

Significant Genotype x Sex x Test Day interaction:  $p=0.031$ .

### DISTANCE TRAVELED IN CENTER

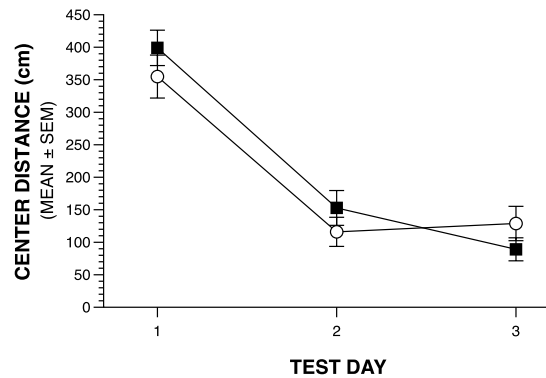

No significant effects involving Genotype or Sex and no significant comparisons.

### DISTANCE TRAVELED IN OPEN ARMS

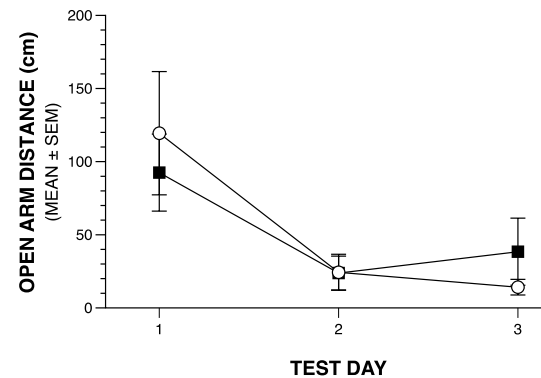

No significant effects involving Genotype or Sex and no significant comparisons.

## CONDITIONED FEAR

### DAY 1: BASELINE - T/S TRAINING BOTH SEXES COMBINED

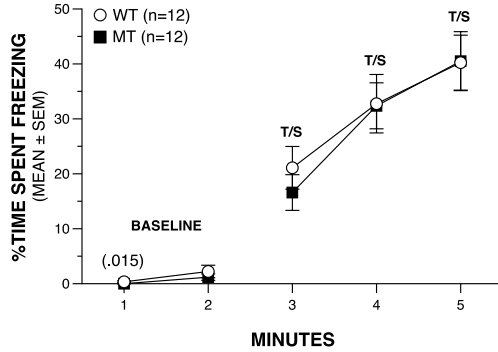

**BASELINE:** no significant effects involving Genotype but a significant Sex effect ( $p=.049$ ).

**T/S TRAINING:** no significant effects involving Genotype or Sex and no significant comparisons.

### DAY 2: CONTEXTUAL FEAR BOTH SEXES COMBINED

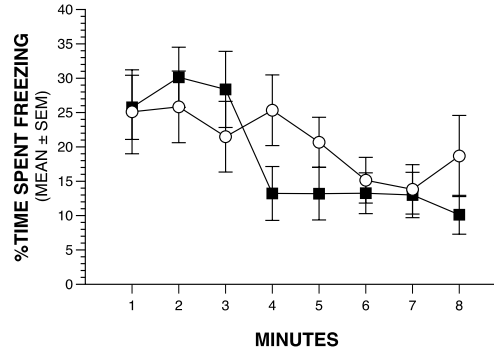

Significant Genotype x Minutes interaction ( $*p=.029$ ), and Genotype x Sex x Minutes interaction ( $p=.017$ ).

### DAY 3: AUDITORY CUE BOTH SEXES COMBINED

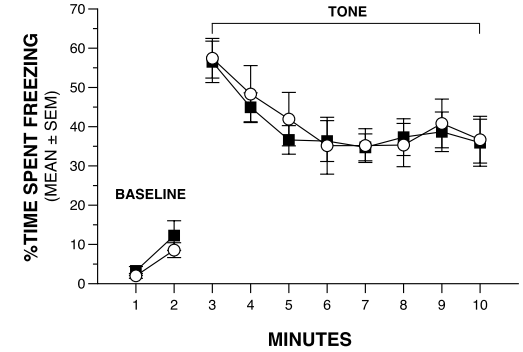

**BASELINE:** no significant effects involving Genotype or Sex and no significant comparisons.

**AUDITORY CUE:** no significant effects involving Genotype or Sex and no significant comparisons.

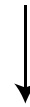

### DAY 2: CONTEXTUAL FEAR SEX BY GENOTYPE

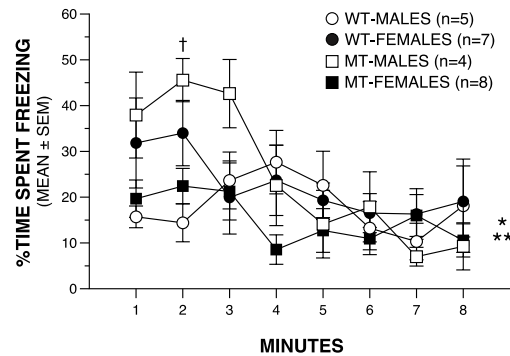

Significant Genotype x Minutes interaction ( $*p=.029$ ), and Genotype x Minutes x Sex interaction ( $**p=.017$ ).  
WT-Males vs MT-Males: ns; Minute 2 ( $\dagger p=.002$ )



## ACOUSTIC STARTLE/PPI

### ACOUSTIC STARTLE

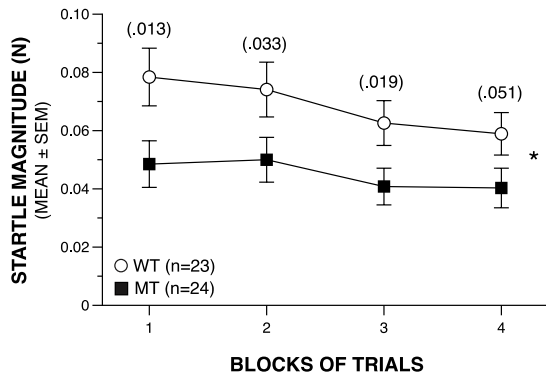

Significant Genotype (\* $p=.018$ ) and Sex ( $p=.004$ ) effects.

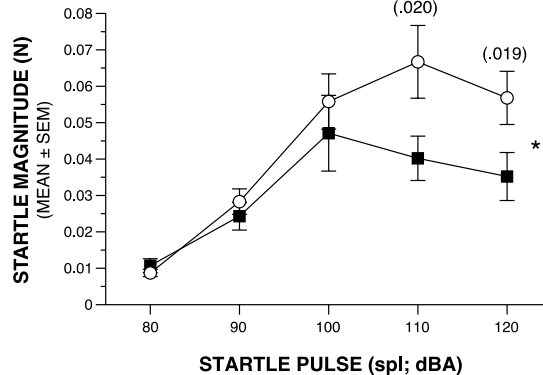

Significant Sex effect ( $p=.006$ ), and Genotype x Pulse (\* $p=.018$ ), and Sex x Pulse ( $p=.004$ ) interactions.

### % OF MICE SIGNIFICANTLY STARTLED

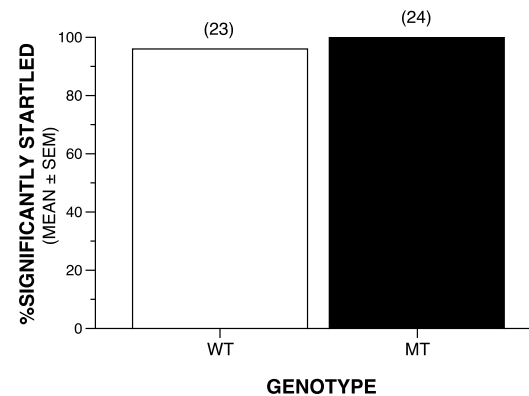

24/24 MT mice and 23/24 WT mice exhibited a significantly increased startle magnitude compared to those during no stimulation trials.

### TOTAL MEAN %PPI

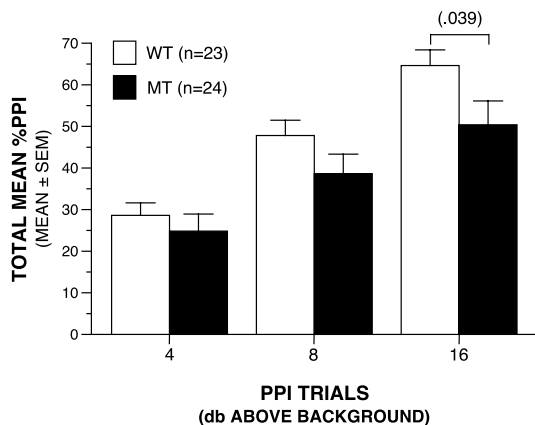

Significant Genotype x PPI trials interaction:  $p=.029$ . Genotype effect:  $p=.10$ .

### SINGLE BLOCK %PPI

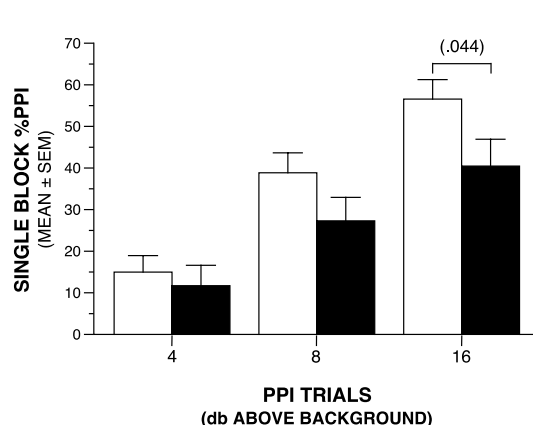

Significant Genotype x PPI trials interaction:  $p=.048$ . Sex effect:  $p=.051$ . Genotype effect:  $p=.11$ .

### BODY WEIGHTS AT TESTING

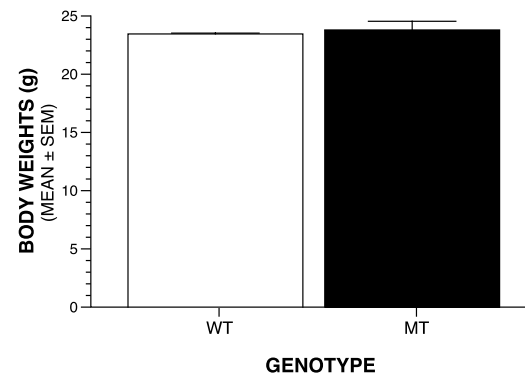

No Significant effect involving Genotype, but a significant Sex effect ( $p<.00005$ ).

## ACOUSTIC STARTLE/PPI

### ACOUSTIC STARTLE

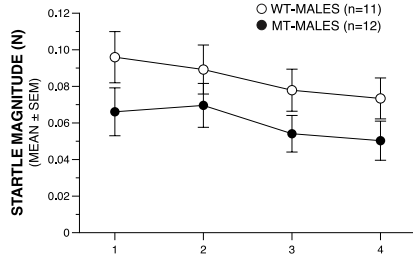

Significant Genotype (\* $p=.018$ ) and Sex ( $p=.004$ ) effects.  
 WT-MALES vs MT-MALES: ns; and no significant between-groups comparisons.  
 Genotype effect:  $p=.096$ .

### ACOUSTIC STARTLE: INCREASING SPLs

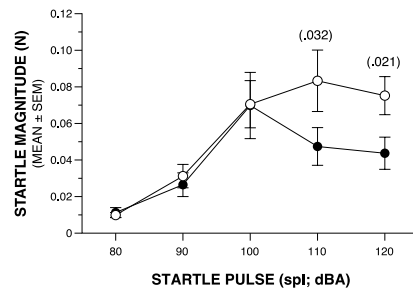

Significant Sex effect ( $p=.006$ ), and Genotype x Pulse (\* $p=.018$ ), and Sex x Pulse ( $p=.004$ ) interactions.  
 WT-MALES vs MT-MALES: ns.

### TOTAL MEAN %PPI

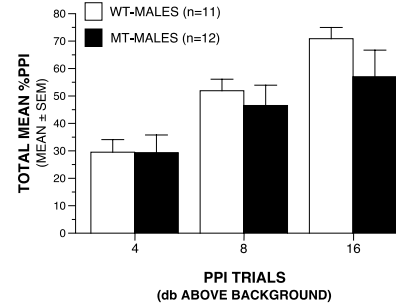

Significant Genotype x PPI trials interaction:  $p=.029$ .  
 WT-MALES vs MT-MALES: ns; and no significant between-groups comparisons.

### SINGLE BLOCK %PPI

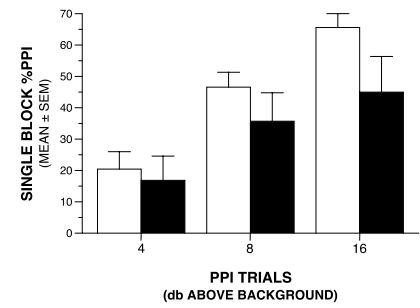

Significant Genotype x PPI trials interaction:  $p=.048$ . Sex effect:  $p=.051$ .  
 WT-MALES vs MT-MALES: ns; and no significant between-groups comparisons.

### ACOUSTIC STARTLE

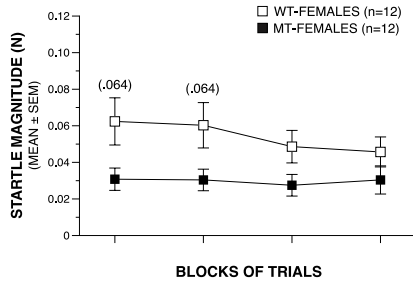

Significant Genotype (\* $p=.018$ ) and Sex ( $p=.004$ ) effects.  
 WT-FEMALES vs MT-FEMALES: ns; and no significant between-groups comparisons.  
 Genotype effect:  $p=.084$ .

### ACOUSTIC STARTLE: INCREASING SPLs

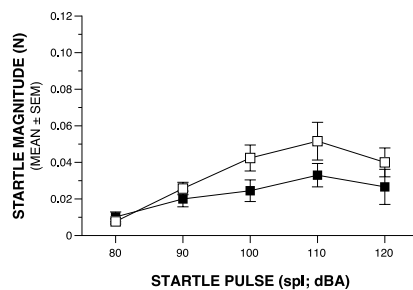

Significant Sex effect ( $p=.006$ ), and Genotype x Pulse (\* $p=.018$ ), and Sex x Pulse ( $p=.004$ ) interactions.  
 WT-FEMALES vs MT-FEMALES: ns; and no significant between-groups comparisons.

### TOTAL MEAN %PPI

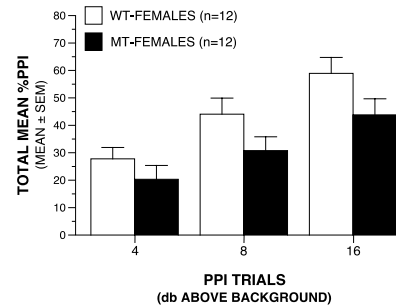

Significant Genotype x PPI trials interaction:  $p=.029$ .  
 WT-FEMALES vs MT-FEMALES: ns; and no significant between-groups comparisons.

### SINGLE BLOCK %PPI

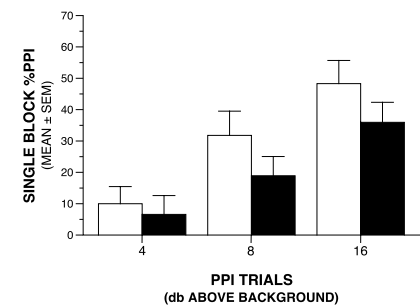

Significant Genotype x PPI trials interaction:  $p=.048$ . Sex effect:  $p=.051$ .  
 WT-FEMALES vs MT-FEMALES: ns; and no significant between-groups comparisons.

## SOCIAL APPROACH TEST TRIAL - ZONE VARIABLES

### TIME IN INVESTIGATION ZONE

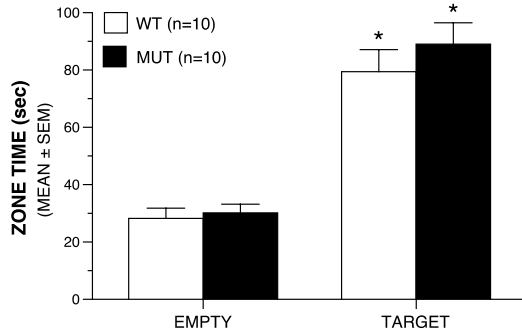

#### INVESTIGATION ZONE

Significant Genotype x Sex x Zone interaction ( $p=.044$ ), but no significant between-groups comparisons.  
 WT: Empty vs Target:  $*p<.00005$ .  
 MUT: Empty vs Target:  $*p<.00005$ .

### INVESTIGATION ZONE ENTRIES

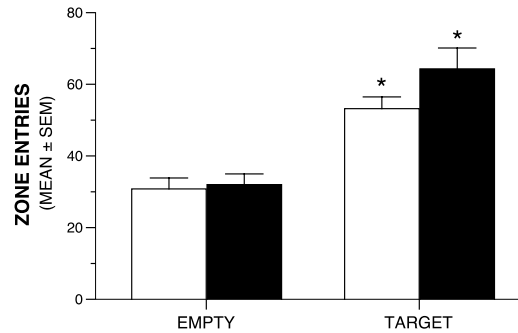

#### INVESTIGATION ZONE

No significant effects involving Genotype or Sex, and no significant between-groups comparisons.  
 WT: Empty vs Target:  $*p=.0009$ .  
 MUT: Empty vs Target:  $*p<.00005$ .

### LATENCY INTO INVESTIGATION ZONE

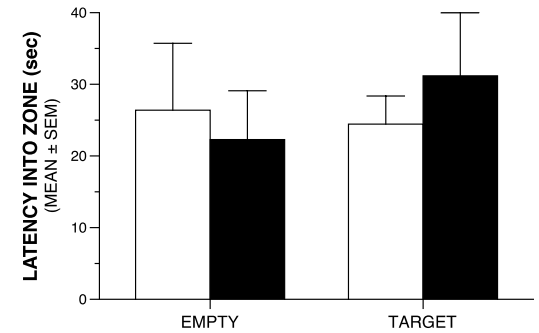

#### INVESTIGATION ZONE

No significant effects involving Genotype or Sex, and no significant comparisons.

### TIME IN INVESTIGATION ZONE

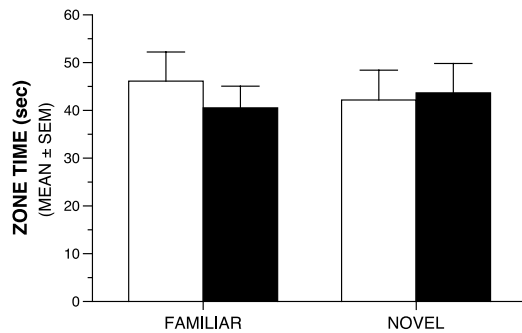

#### INVESTIGATION ZONE

Significant Genotype x Sex x Zone interaction ( $p=.0003$ ), but no significant comparisons.

### INVESTIGATION ZONE ENTRIES

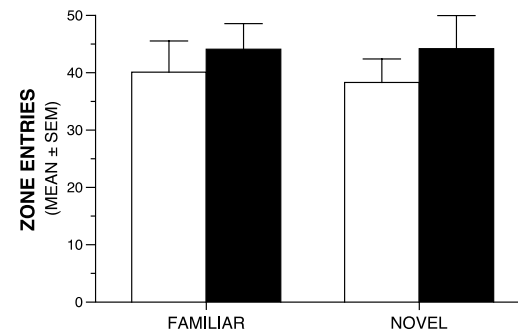

#### INVESTIGATION ZONE

Significant Genotype x Sex x Zone interaction ( $p=.0002$ ), but no significant comparisons.

### LATENCY INTO INVESTIGATION ZONE

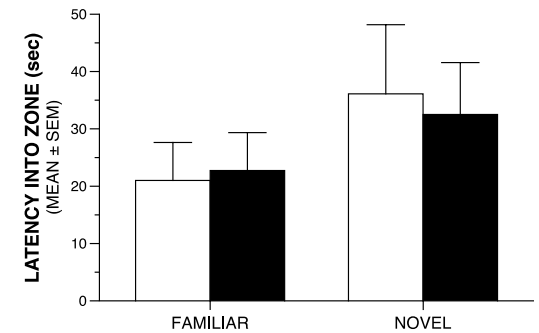

#### INVESTIGATION ZONE

No significant effects involving Genotype or Sex, and no significant comparisons.

## SOCIAL APPROACH TEST TRIAL - CHAMBER VARIABLES

### TIME IN CHAMBERS

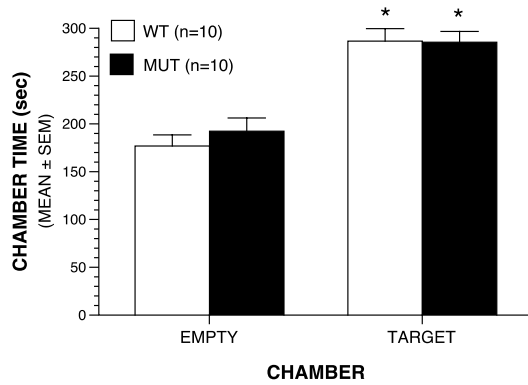

No significant effects involving Genotype or Sex, and no significant between-groups comparisons.

WT: Empty vs Target: \* $p=0.0004$ .  
MUT: Empty vs Target: \* $p=0.002$ .

### ENTRIES INTO CHAMBERS

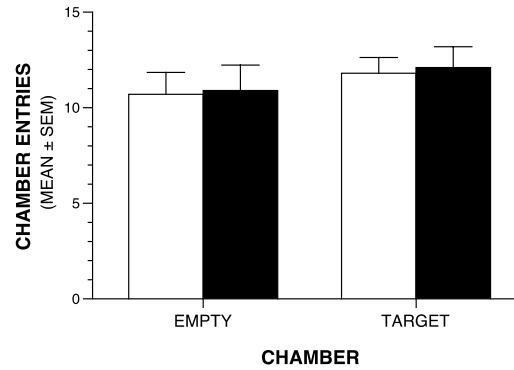

No significant effects involving Genotype or Sex, and no significant comparisons.

### LATENCY INTO CHAMBERS

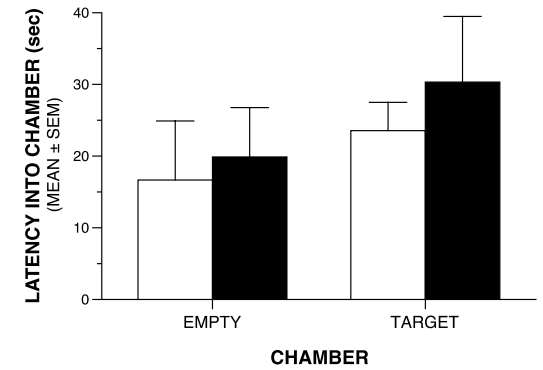

No significant effects involving Genotype or Sex, and no significant comparisons.

### TIME IN CHAMBERS

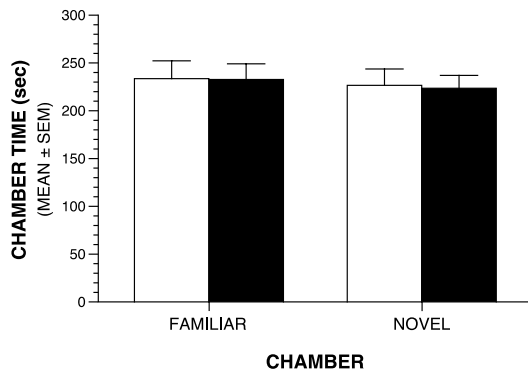

No significant effects involving Genotype, but a significant Sex x Chamber interaction ( $p=0.009$ ). No significant comparisons.

### ENTRIES INTO CHAMBERS

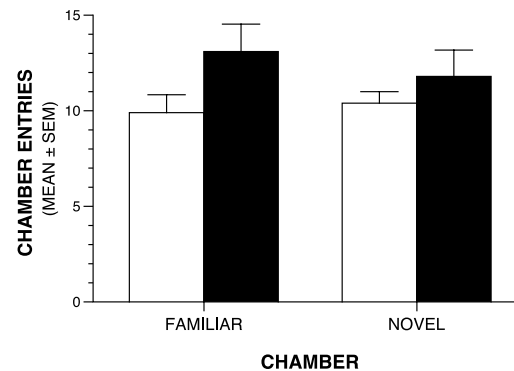

No significant effects involving Genotype or Sex, and no significant comparisons.

### LATENCY INTO CHAMBERS

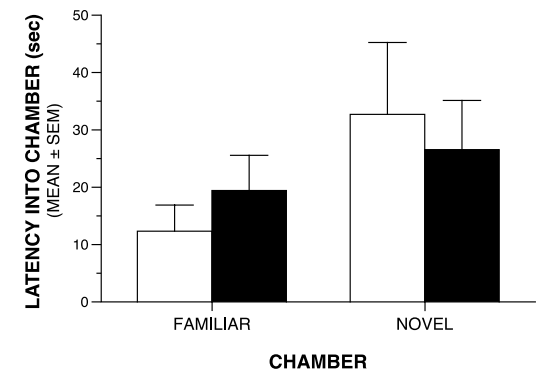

No significant effects involving Genotype or Sex, and no significant comparisons.

## TAIL-SUSPENSION TEST

### TOTAL IMMOBILITY TIME

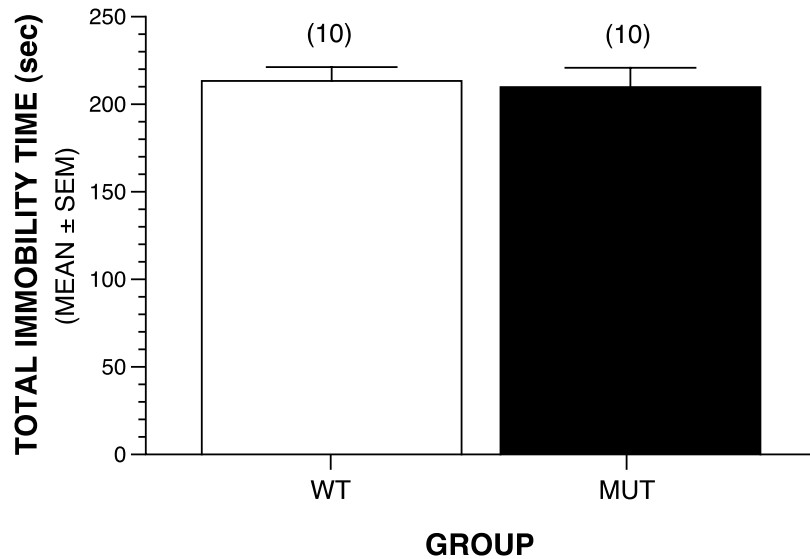

No significant effects involving Genotype or Sex.

### IMMOBILITY ACROSS TIME BLOCKS

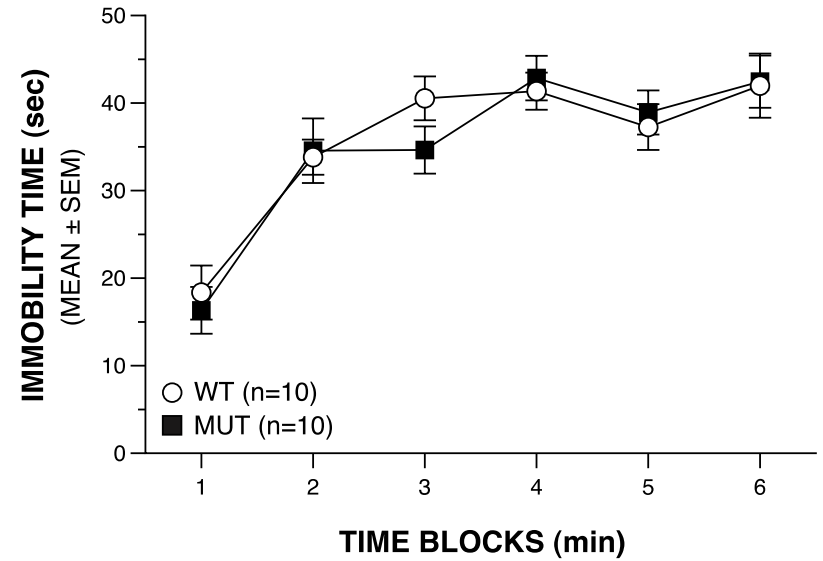

No significant effects involving Genotype or Sex, and no significant between-groups comparisons.
